# Supplementary material for: Tandem buildup of complexity of aromatic molecules through multiple successive electrophile generation in one pot, controlled by varying the reaction temperature
Source: Royal Society of Chemistry journal article supplement (doi:10.1039/c5ob02240a), 2015-12-24
Supplement: c5ob02240a1.pdf [file c5ob02240a1.pdf]

## Supporting Information

### Tandem Buildup of Complexity of Aromatic Molecules Through Multiple Successive Electrophile Generation in One Pot, Controlled by Varying the Reaction Temperature

Akinari Sumita,<sup>[a]</sup> Yuko Otani,<sup>[a]</sup> Tomohiko Ohwada<sup>[a]\*</sup>

[a] Graduate School of Pharmaceutical Sciences, The University of Tokyo, 7-3-1  
Hongo, Bunkyo-ku, Tokyo 113-0033, Japan

#### \*Corresponding Author

TEL: +81-3-5841-4730

FAX: +81-3-5841-4735

E-mail: ohwada@mol.f.u-toko.ac.jp

#### Table of contents

##### I. General Method

##### II. Kinetic Study

##### III. Computational Study

##### IV. Synthesis of Chemical Compounds and One-pot Reactions

##### V. NMR spectra

##### VI. References in Supporting Information

##### I. General Method

Melting points were determined with a Yanaco micro melting point apparatus without correction. <sup>1</sup>H-NMR (400 MHz) and <sup>13</sup>C-NMR spectra (100 MHz) were recorded on a Bruker Avance400. Chemical shifts were calibrated with tetramethylsilane as an internal standard or with the solvent peak, and are shown in ppm (δ) values, and coupling constants are shown in hertz (Hz). The following abbreviations are used: s = singlet, d = doublet, t = triplet, q = quartet, dd = double doublet, ddd = double double doublet, dt = double triplet, td = triple doublet, qd = quarto doublet, qt = quarto triplet m = multiplet, and brs = broad singlet. Electron spray ionization time-of-flight mass spectra (ESI-TOF MS) were recorded on a Bruker micrOTOF-05 to give

high-resolution mass spectra (HRMS). All of the reactions were performed in heat-gun-dried or oven-dried glassware. Trifluoromethanesulfonic acid (TfOH) was treated with trifluoromethanesulfonic anhydride (Tf<sub>2</sub>O) before distillation, and purified prior to use by distillation under reduced pressure. Other commercially available compounds and solvents were used as received.

## II. Kinetic Study

A weighed substrate (carbamate **1b** or **1f**) and *para*-xylene were stored in a dry flask, filled with dry argon gas and mixture of distilled TfOH and distilled TFA<sup>[S1]</sup> in specified weight ratios (total 0.7 mL for 0.07 mmol of carbamate **1b** or **1f**) was added and the solution was stirred at -40°C. An aliquot of the solution was transferred into an NMR tube, drying in a test tube filled with argon and the tube was shielded tightly. The NMR tube, containing the solution of the carbamate was heated in the NMR machine at specified temperature (at 31°C for **1b** and -6°C for **1f** in this case). Temperature of the sample in the NMR probe was calibrated by using methanol according to the Geet's method.<sup>[S2]</sup> Magnetic field locking was not used, but the shimming was maximized with using CDCl<sub>3</sub> before measurements. The peak of TfOH was used as an internal standard of integration.

The integration value of protons of the carbamate (**1b** or **1f**), as compared with that of TfOH, was obtained and the concentrations of the carbamate (**1b** or **1f**) are calculated. The logarithms of the concentration of starting substrate (log[C]) were plotted against time (*t*, min) to give pseudo first order kinetics (regression coefficient *r* > 0.99 in all cases). The rate constants were obtained on the basis of the data.

### [A] Kinetic study about the reaction of ortho ester carbamate **1b** and *para*-xylene.

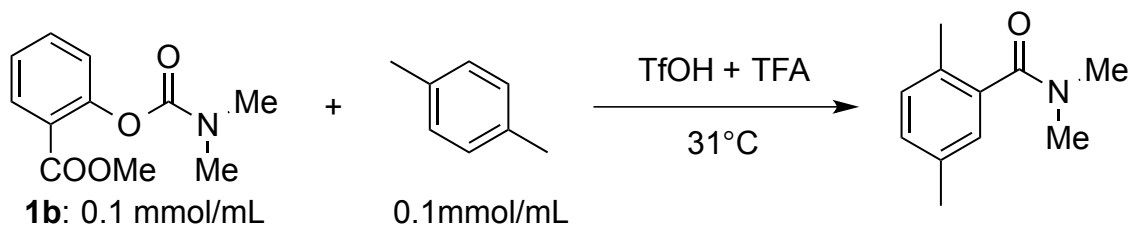

(a)  $-H_0 = 7.7$  (TfOH/TFA = 0.9 (w/w%))

| Time [min] | Concentration [mmol/mL] | log[C]  |
|------------|-------------------------|---------|
| 0          | 0.1000                  | -1.0000 |
| 2          | 0.0920                  | -1.0361 |
| 4          | 0.0861                  | -1.0650 |
| 6          | 0.0812                  | -1.0902 |
| 8          | 0.0759                  | -1.1197 |
| 10         | 0.0715                  | -1.1457 |
| 12         | 0.0688                  | -1.1626 |
| 14         | 0.0668                  | -1.1754 |
| 16         | 0.0626                  | -1.2036 |

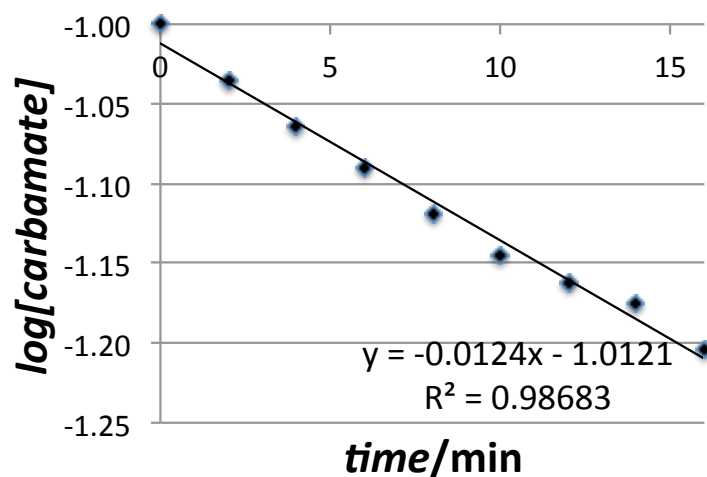

(b)  $-H_0 = 9.7$  (TfOH/TFA = 11.4 (w/w%))

| Time [min] | Concentration [mmol/mL] | log[C]  |
|------------|-------------------------|---------|
| 0          | 0.1000                  | -1.0000 |
| 2          | 0.0746                  | -1.1275 |
| 4          | 0.0570                  | -1.2443 |
| 6          | 0.0438                  | -1.3583 |
| 8          | 0.0342                  | -1.4660 |
| 10         | 0.0252                  | -1.5986 |
| 12         | 0.0174                  | -1.7592 |
| 14         | 0.0162                  | -1.7908 |
| 16         | 0.0131                  | -1.8819 |
| 18         | 0.0107                  | -1.9727 |
| 20         | 0.0088                  | -2.0579 |

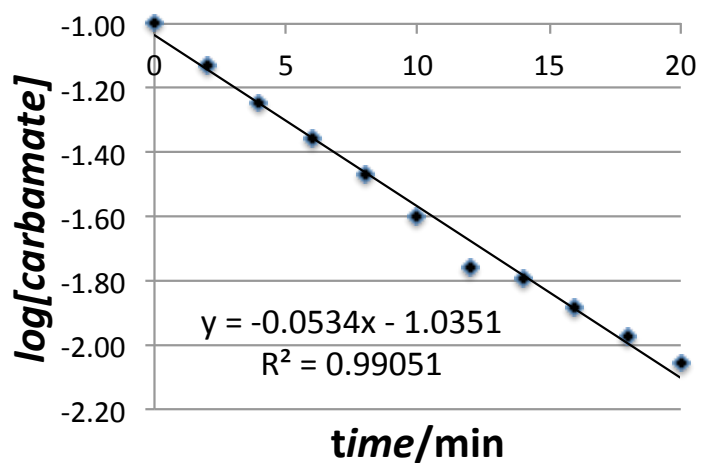

(c)  $-H_0 = 11.8$  (TfOH/TFA = 53.4 (w/w%))

| Time [min] | Concentration [mmol/mL] | log[C]  |
|------------|-------------------------|---------|
| 0          | 0.1000                  | -1.0000 |
| 2          | 0.0790                  | -1.1023 |
| 4          | 0.0612                  | -1.2130 |
| 6          | 0.0477                  | -1.3218 |
| 8          | 0.0374                  | -1.4275 |
| 10         | 0.0272                  | -1.5648 |
| 12         | 0.0208                  | -1.6826 |
| 14         | 0.0162                  | -1.7894 |
| 16         | 0.0126                  | -1.8990 |
| 18         | 0.0098                  | -2.0091 |
| 20         | 0.0076                  | -2.1187 |

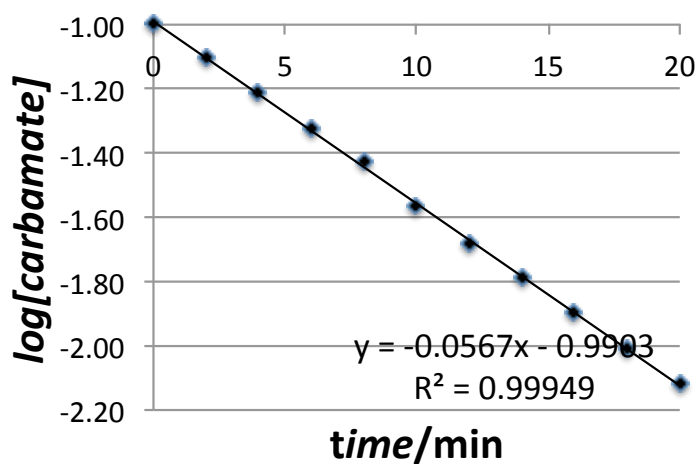

(d)  $-H_0 = 12.2$  (TfOH/TFA = 62.4 (w/w%))

| Time [min] | Concentration [mmol/mL] | log[C]  |
|------------|-------------------------|---------|
| 0          | 0.1000                  | -1.0000 |
| 2          | 0.0803                  | -1.0952 |
| 4          | 0.0647                  | -1.1893 |
| 6          | 0.0520                  | -1.2838 |
| 8          | 0.0418                  | -1.3793 |
| 10         | 0.0339                  | -1.4694 |
| 12         | 0.0273                  | -1.5634 |
| 14         | 0.0220                  | -1.6577 |
| 16         | 0.0180                  | -1.7436 |
| 18         | 0.0146                  | -1.8358 |
| 20         | 0.0119                  | -1.9230 |

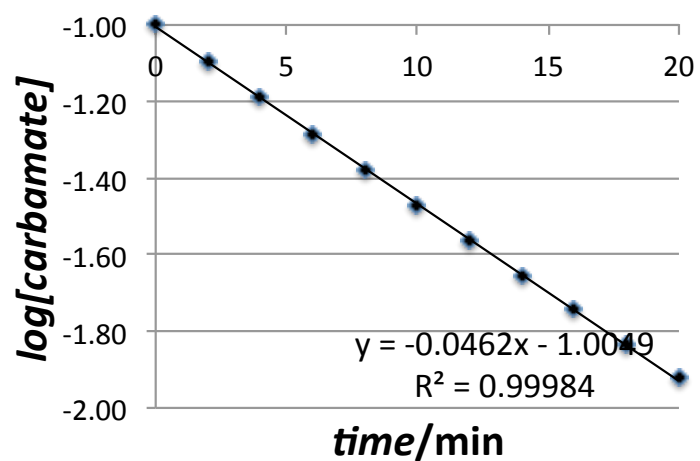

(e)  $-H_0 = 13.5$  (TfOH/TFA = 98.2 (w/w%))

| Time [min] | Concentration [mmol/mL] | log[C]  |
|------------|-------------------------|---------|
| 0          | 0.1000                  | -1.0000 |
| 2          | 0.0945                  | -1.0244 |
| 4          | 0.0889                  | -1.0509 |
| 6          | 0.0840                  | -1.0755 |
| 8          | 0.0792                  | -1.1010 |
| 10         | 0.0752                  | -1.1236 |
| 12         | 0.0709                  | -1.1493 |
| 14         | 0.0668                  | -1.1755 |
| 16         | 0.0634                  | -1.1980 |
| 18         | 0.0599                  | -1.2228 |

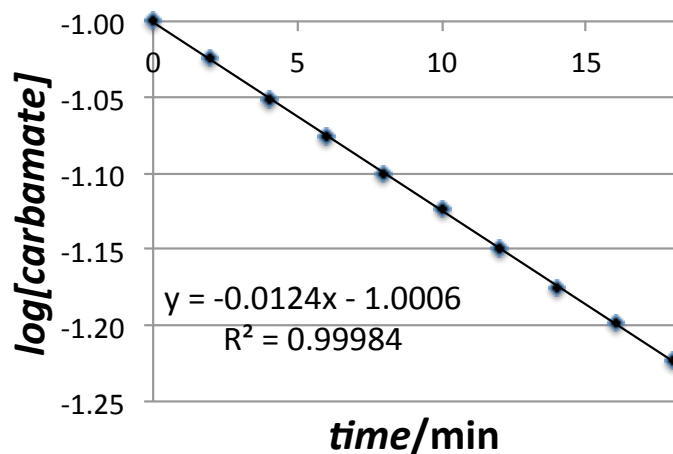

[B] Kinetic study about the reaction of *ortho, para*-diester carbamate **1f** and *para*-xylene.

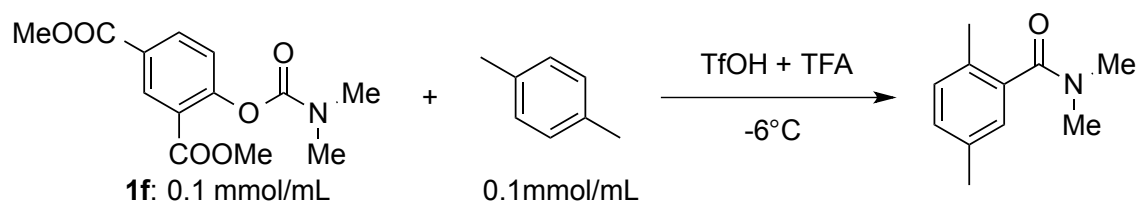

(a')  $-H_0 = 9.7$  (TfOH/TFA = 11.4 (w/w%))

| Time [min] | Concentration [mmol/mL] | $\log[C]$ |
|------------|-------------------------|-----------|
| 0          | 0.1000                  | -1.0000   |
| 2          | 0.0987                  | -1.0059   |
| 4          | 0.0981                  | -1.0085   |
| 6          | 0.0976                  | -1.0106   |
| 8          | 0.0963                  | -1.0165   |
| 10         | 0.0963                  | -1.0164   |
| 12         | 0.0952                  | -1.0213   |
| 14         | 0.0950                  | -1.0224   |
| 16         | 0.0943                  | -1.0253   |
| 18         | 0.0937                  | -1.0281   |
| 20         | 0.0930                  | -1.0317   |
| 22         | 0.0923                  | -1.0349   |
| 24         | 0.0920                  | -1.0363   |
| 26         | 0.0912                  | -1.0401   |
| 28         | 0.0907                  | -1.0422   |
| 30         | 0.0900                  | -1.0459   |
| 32         | 0.0893                  | -1.0492   |
| 34         | 0.0888                  | -1.0514   |

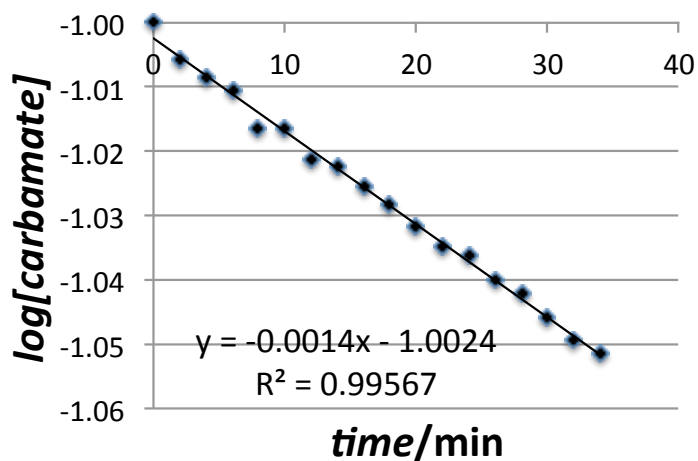

(b')  $-H_0 = 11.8$  (TfOH/TFA = 53.4 (w/w%))

| Time [min] | Concentration [mmol/mL] | $\log[C]$ |
|------------|-------------------------|-----------|
| 0          | 0.1000                  | -1.0000   |
| 2          | 0.0922                  | -1.0354   |
| 4          | 0.0861                  | -1.0649   |
| 6          | 0.0804                  | -1.0945   |
| 8          | 0.0758                  | -1.1205   |
| 10         | 0.0712                  | -1.1475   |
| 12         | 0.0658                  | -1.1815   |
| 14         | 0.0632                  | -1.1994   |
| 16         | 0.0592                  | -1.2277   |
| 18         | 0.0567                  | -1.2462   |
| 20         | 0.0530                  | -1.2756   |
| 22         | 0.0508                  | -1.2944   |
| 24         | 0.0477                  | -1.3211   |

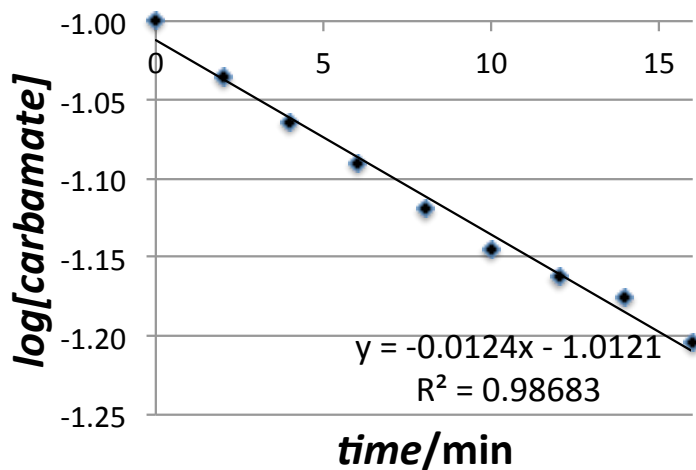

(c')  $-H_0 = 12.2$  (TfOH/TFA = 62.4 (w/w%))

| Time [min] | Concentration [mmol/mL] | log[C]  |
|------------|-------------------------|---------|
| 0          | 0.1000                  | -1.0000 |
| 2          | 0.0746                  | -1.1275 |
| 4          | 0.0570                  | -1.2443 |
| 6          | 0.0438                  | -1.3583 |
| 8          | 0.0342                  | -1.4660 |
| 10         | 0.0252                  | -1.5986 |
| 12         | 0.0174                  | -1.7592 |
| 14         | 0.0162                  | -1.7908 |
| 16         | 0.0131                  | -1.8819 |
| 18         | 0.0107                  | -1.9727 |
| 20         | 0.0088                  | -2.0579 |

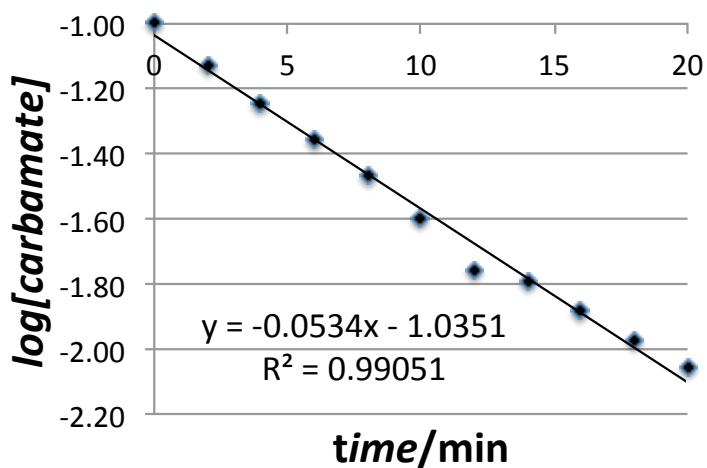

(d')  $-H_0 = 13.5$  (TfOH/TFA = 98.2 (w/w%))

| Time [min] | Concentration [mmol/mL] | log[C]  |
|------------|-------------------------|---------|
| 0          | 0.1000                  | -1.0000 |
| 2          | 0.0916                  | -1.0382 |
| 4          | 0.0834                  | -1.0788 |
| 6          | 0.0760                  | -1.1193 |
| 8          | 0.0700                  | -1.1552 |
| 10         | 0.0642                  | -1.1921 |
| 12         | 0.0591                  | -1.2286 |
| 14         | 0.0533                  | -1.2731 |
| 16         | 0.0490                  | -1.3101 |
| 18         | 0.0456                  | -1.3411 |
| 20         | 0.0403                  | -1.3951 |
| 22         | 0.0373                  | -1.4278 |

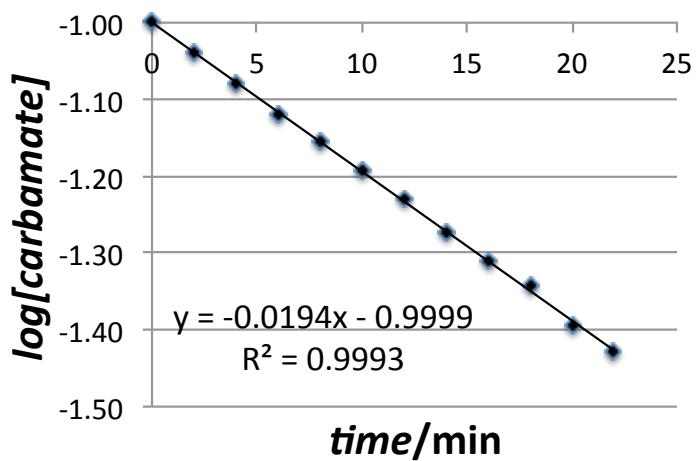

(e')  $-H_0 = 14.1$  (only TfOH)

| Time [min] | Concentration [mmol/mL] | log[C]  |
|------------|-------------------------|---------|
| 0          | 0.1000                  | -1.0000 |
| 2          | 0.0904                  | -1.0436 |
| 4          | 0.0829                  | -1.0812 |
| 6          | 0.0751                  | -1.1240 |
| 8          | 0.0687                  | -1.1627 |
| 10         | 0.0629                  | -1.2011 |
| 12         | 0.0567                  | -1.2465 |
| 14         | 0.0517                  | -1.2862 |
| 16         | 0.0468                  | -1.3294 |
| 18         | 0.0430                  | -1.3662 |
| 20         | 0.0384                  | -1.4152 |

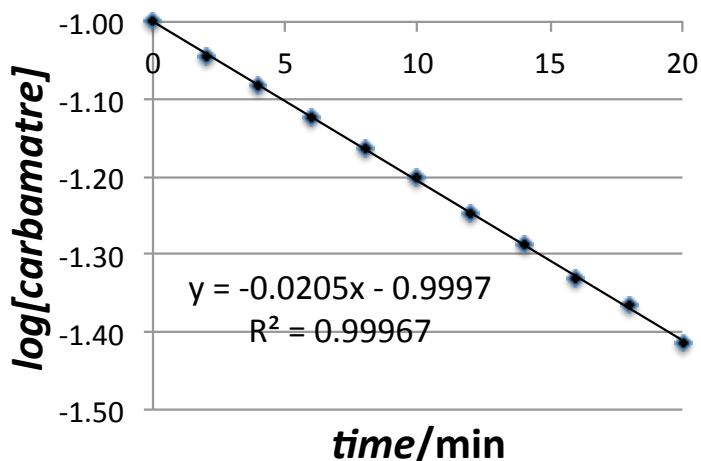

### III. Computational Studies

We carried out computational studies by using the Gaussian 09 suites of programs.<sup>[S3]</sup> The geometries of the reactants (**SM**), transition states (**TS**), and products (**PM**) for dissociation step were fully optimized using the CPCM-B3LYP/6-31+G(d) level. Harmonic vibrational frequency computations characterized the optimized structures. Intrinsic reaction coordinate (IRC) computations of the transition structures verified the reactants, intermediates, and products on the potential energy surface (PES). Bulk solvation effects (self-consistent reaction field, SCRF) were simulated by the CPCM method in trifluoromethanesulfonic acid as a solvent ( $\epsilon_{\text{ps}} = 77.4$ ,<sup>[S4]</sup>  $\text{rsolv} = 2.5985274$ ,<sup>[S4]</sup>  $\text{density} = 1.696$ ,<sup>[S5]</sup>  $\text{epsinf} = 1.882384$  (the value of acetic acid was employed)). Single point energies were calculated with CPCM-M06-2X/6-311++G(d,p) (and some other calculation levels) on the basis of the optimized structures. The zero-point vibrational energy corrections were done without scaling.



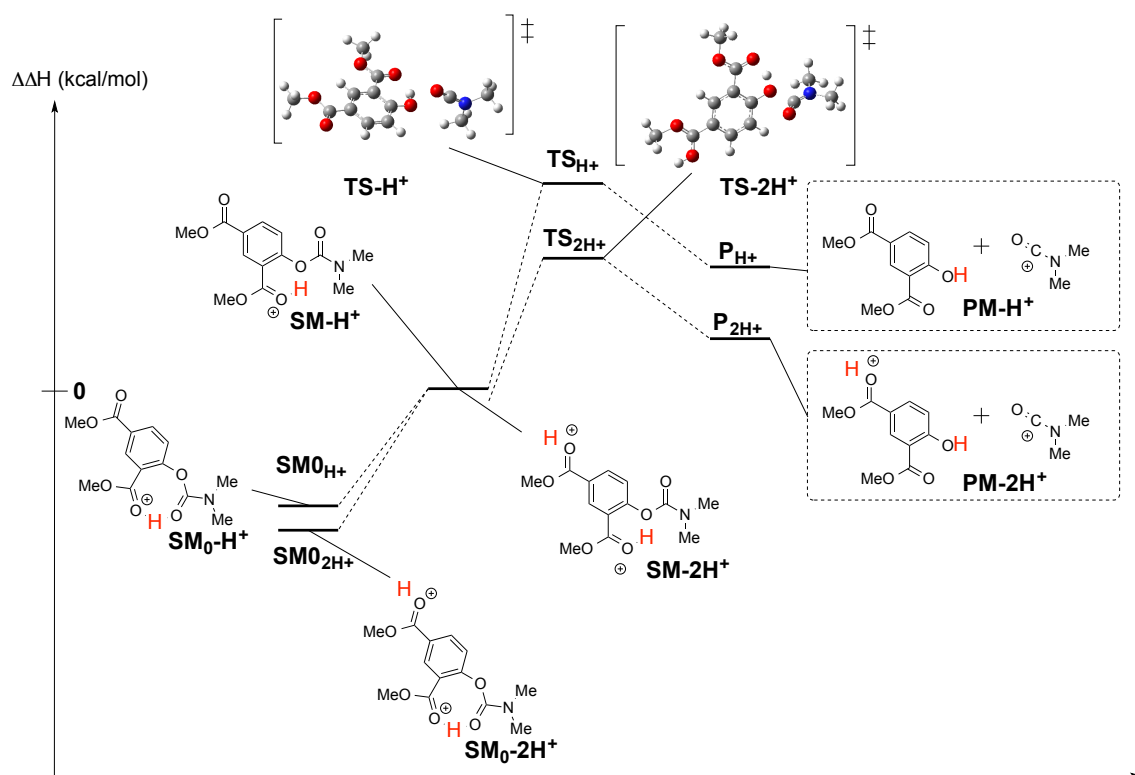

| Energy Level              | Reaction Coordinate             |                                 |                                |                              |                               |                               |                             |  |
|---------------------------|---------------------------------|---------------------------------|--------------------------------|------------------------------|-------------------------------|-------------------------------|-----------------------------|--|
|                           | SMO <sub>2</sub> H <sup>+</sup> | SMO <sub>0</sub> H <sup>+</sup> | TS <sub>2</sub> H <sup>+</sup> | TS <sub>H</sub> <sup>+</sup> | $\Delta E(=E_{H^+}-E_{2H^+})$ | P <sub>2</sub> H <sup>+</sup> | P <sub>H</sub> <sup>+</sup> |  |
| CPCM-M06/6-311++G(d,p)    | -4.0                            | -4.4                            | 12.5                           | 13.4                         | <b>0.9</b>                    | 4.7                           | 9.2                         |  |
| CPCM-M06-2x/6-311++G(d,p) | -6.6                            | -6.8                            | 12.5                           | 15.4                         | <b>2.9</b>                    | 7.7                           | 12.2                        |  |
| CPCM-M06-HF/6-311++G(d,p) |                                 |                                 | 12.2                           | 16.5                         | <b>4.3</b>                    | 11.5                          | 15.5                        |  |
| CPCM-B3LYP/6-311++G(d,p)  |                                 |                                 | 9.5                            | 11.2                         | <b>1.7</b>                    | 1.3                           | 6.6                         |  |
| CPCM-B3PW91/6-311++G(d,p) |                                 |                                 | 10.6                           | 13.2                         | <b>2.6</b>                    | 4.0                           | 9.4                         |  |
| CPCM-MP2/6-311++G(d,p)    | -8.4                            | -8.2                            | 6.5                            | 8.7                          | <b>2.2</b>                    | 1.8                           | 6.2                         |  |
| CPCM-MP2/aug-ccVDZ        |                                 |                                 | 7.0                            | 9.4                          | <b>2.4</b>                    | 4.0                           | 8.3                         |  |

**Figure SI-1. Calculated energy diagram (in  $\Delta\Delta H$ ) of C-O bond cleavage step of 1f (structure was optimized at CPCM-B3LYP/6-31+G(d))**

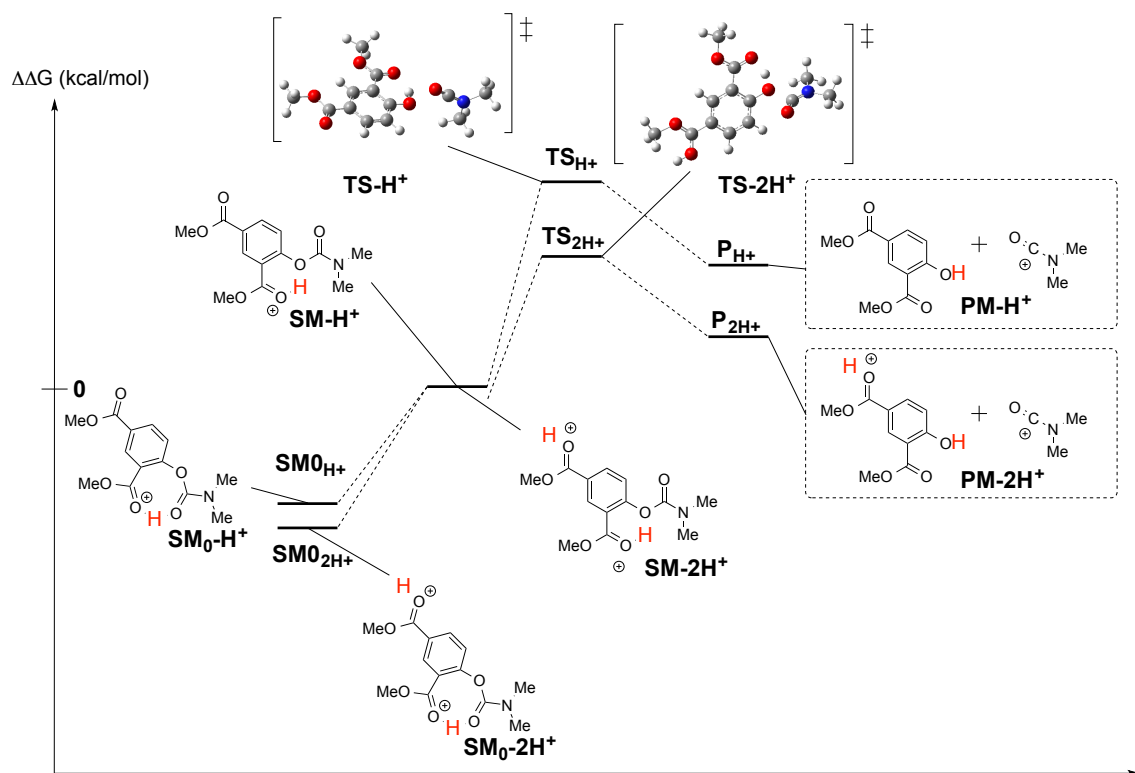

| Energy Level              | Reaction Coordinate             |                                 |                                |                              |                               |                               |                             |
|---------------------------|---------------------------------|---------------------------------|--------------------------------|------------------------------|-------------------------------|-------------------------------|-----------------------------|
|                           | SMO <sub>2</sub> H <sup>+</sup> | SMO <sub>0</sub> H <sup>+</sup> | TS <sub>2</sub> H <sup>+</sup> | TS <sub>H</sub> <sup>+</sup> | $\Delta G(=G_{H^+}-G_{2H^+})$ | P <sub>2</sub> H <sup>+</sup> | P <sub>H</sub> <sup>+</sup> |
| CPCM-M06/6-311++G(d,p)    | -3.5                            | -4.3                            | 12.6                           | 13.6                         | <b>1.0</b>                    | 1.5                           | 6.4                         |
| CPCM-M06-2x/6-311++G(d,p) | -6.0                            | -6.7                            | 12.6                           | 15.4                         | <b>2.8</b>                    | 4.7                           | 9.3                         |
| CPCM-M06-HF/6-311++G(d,p) |                                 |                                 | 12.2                           | 16.6                         | <b>4.4</b>                    | 8.5                           | 12.7                        |
| CPCM-B3LYP/6-311++G(d,p)  |                                 |                                 | 9.6                            | 11.3                         | <b>1.7</b>                    | -1.7                          | 3.7                         |
| CPCM-B3PW91/6-311++G(d,p) |                                 |                                 | 10.7                           | 13.3                         | <b>2.6</b>                    | 1.0                           | 6.6                         |
| CPCM-MP2/6-311++G(d,p)    | -7.8                            | -8.0                            | 6.5                            | 8.8                          | <b>2.3</b>                    | -1.2                          | 3.4                         |
| CPCM-MP2/aug-ccVDZ        |                                 |                                 | 7.0                            | 9.5                          | <b>2.5</b>                    | 1.0                           | 5.5                         |

**Figure SI-2. Calculated energy diagrams (in  $\Delta\Delta G_{298K}$ ) of C-O bond cleavage steps of 1f (structure was optimized at CPCM-B3LYP/6-31+G(d))**

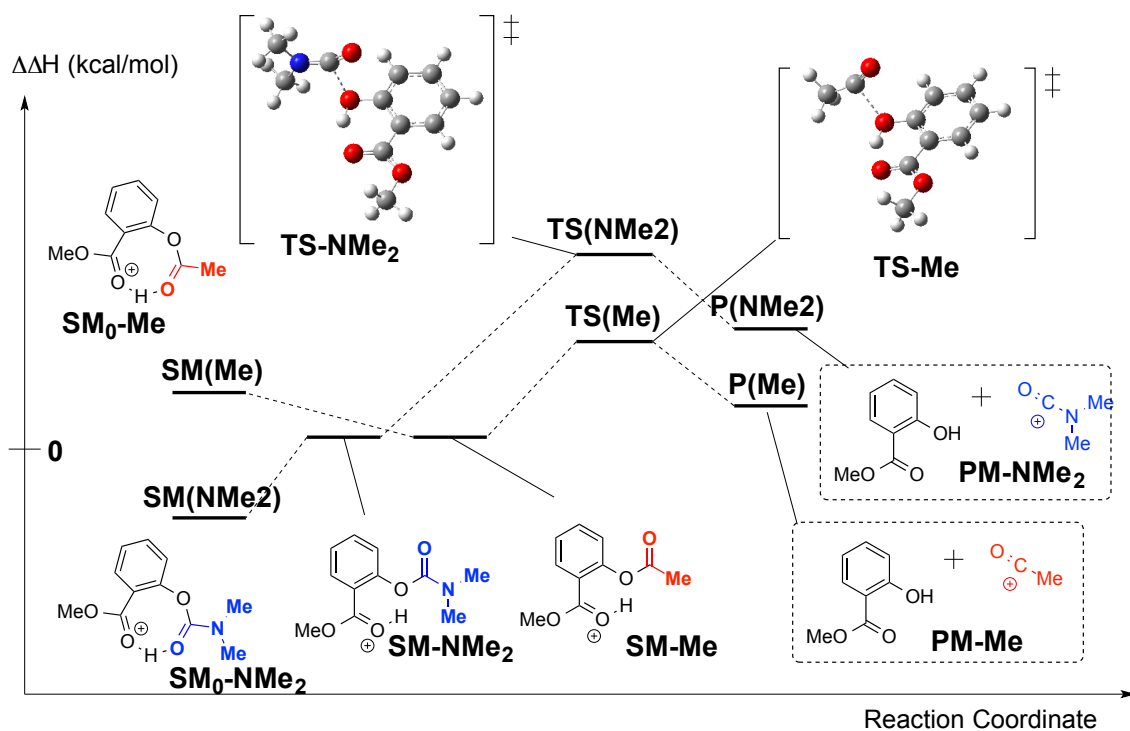

| Calculation Level         | SM(NMe2) | SM(Me) | TS(NMe2) | TS(Me) | $\Delta E(=E(\text{NMe}_2)-E(\text{Me}))$ | P(NMe2) | P(Me) |
|---------------------------|----------|--------|----------|--------|-------------------------------------------|---------|-------|
| CPCM-M06/6-311++G(d,p)    | -4.6     | 2.2    | 13.5     | 12.0   | 1.5                                       | 11.1    | 10.3  |
| CPCM-M06-2X/6-311++G(d,p) | -7.4     | 2      | 17.1     | 13.7   | 3.4                                       | 14.5    | 12.3  |
| CPCM-MP2/6-311++G(d,p)    | -7.6     | 1.9    | 9.6      | 7.0    | 2.6                                       | 8.0     | 5.8   |

**Figure SI-3. Calculated energy diagrams (in  $\Delta\Delta H$ ) of C-O bond cleavage steps of 1b and 1e (structure was optimized at CPCM-B3LYP/6-31+G(d))**

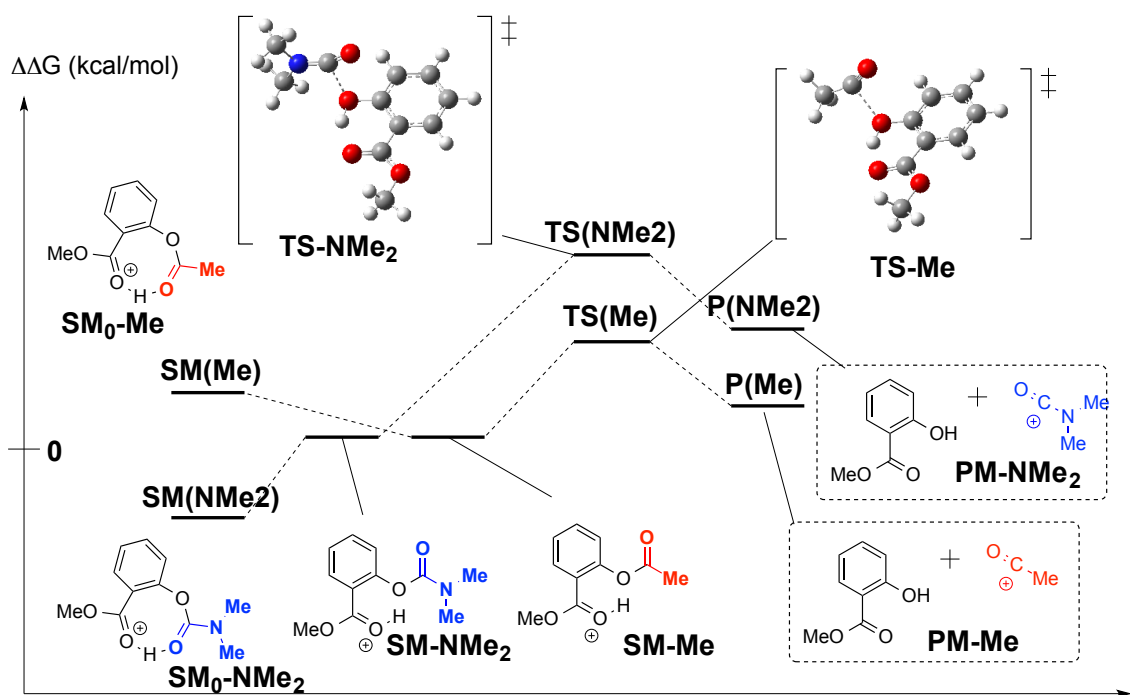

| Calculation Level         | Reaction Coordinate |        |          |        |                                           |         |       |
|---------------------------|---------------------|--------|----------|--------|-------------------------------------------|---------|-------|
|                           | SM(NMe2)            | SM(Me) | TS(NMe2) | TS(Me) | $\Delta G(=G(\text{NMe}_2)-G(\text{Me}))$ | P(NMe2) | P(Me) |
| CPCM-M06/6-311++G(d,p)    | -4.2                | 2.4    | 17.8     | 11.4   | 6.4                                       | 4.3     | 8.7   |
| CPCM-M06-2X/6-311++G(d,p) | -6.9                | 2.2    | 16.1     | 13.1   | 3.0                                       | 10.9    | 10.6  |
| CPCM-MP2/6-311++G(d,p)    | -7.2                | 2.2    | 8.6      | 6.4    | 2.2                                       | 4.4     | 4.2   |

**Figure SI-4.** Calculated energy diagrams (in  $\Delta\Delta G_{298\text{K}}$ ) of C-O bond cleavage steps of 1b and 1e (structure was optimized at CPCM-B3LYP/6-31+G(d))

## Calculation Coordinates

### Diprotonation of carbamate 1f (SM<sub>0</sub>-2H<sup>+</sup>)

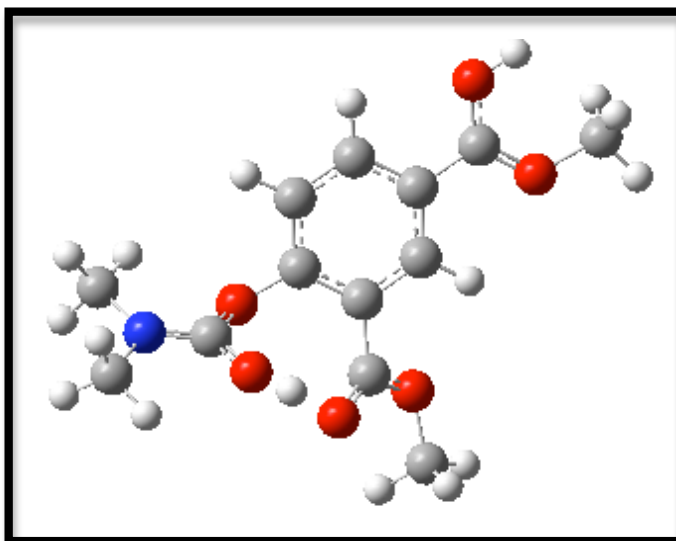

HF = -1011.027115 (M06/6-311++G(d,p))

HF = -1011.253772 (M06-2X/6-311++G(d,p))

HF = -1008.941968 (MP2/6-311++G(d,p))

ZPE = 0.298859 (Hartree/Particle)

Thermal correction to Gibbs Free Energy = 0.248634 (Hartree/Particle)

NIMAG = 0

---

| Center | Atomic | Atomic | Coordinates (Angstroms) |           |           |
|--------|--------|--------|-------------------------|-----------|-----------|
| Number | Number | Type   | X                       | Y         | Z         |
| 1      | 7      | 0      | 3.053131                | -0.341351 | 0.115094  |
| 2      | 6      | 0      | 1.777956                | -0.387476 | -0.173143 |
| 3      | 8      | 0      | 1.346663                | -1.014087 | -1.225136 |
| 4      | 8      | 0      | 0.916936                | 0.185729  | 0.672576  |
| 5      | 6      | 0      | -0.167558               | 0.972831  | 0.199595  |
| 6      | 6      | 0      | -1.443913               | 0.423061  | 0.001851  |
| 7      | 6      | 0      | 0.062588                | 2.339277  | 0.103411  |
| 8      | 6      | 0      | -2.501051               | 1.301725  | -0.292293 |
| 9      | 6      | 0      | -0.997343               | 3.191061  | -0.218160 |
| 10     | 1      | 0      | 1.056417                | 2.731114  | 0.292195  |
| 11     | 6      | 0      | -2.280061               | 2.672625  | -0.410386 |

---

|    |   |   |           |           |           |
|----|---|---|-----------|-----------|-----------|
| 12 | 1 | 0 | -3.493340 | 0.892422  | -0.446674 |
| 13 | 1 | 0 | -0.816931 | 4.258153  | -0.302692 |
| 14 | 6 | 0 | -1.698878 | -1.040462 | 0.021309  |
| 15 | 8 | 0 | -0.903061 | -1.884681 | -0.409712 |
| 16 | 8 | 0 | -2.881217 | -1.364106 | 0.507741  |
| 17 | 6 | 0 | -3.257740 | -2.769233 | 0.482509  |
| 18 | 1 | 0 | -3.254925 | -3.131472 | -0.546834 |
| 19 | 1 | 0 | -2.561190 | -3.345827 | 1.093055  |
| 20 | 1 | 0 | -4.260453 | -2.794632 | 0.904217  |
| 21 | 6 | 0 | 4.036892  | -1.107785 | -0.668997 |
| 22 | 1 | 0 | 3.527950  | -1.822009 | -1.311994 |
| 23 | 1 | 0 | 4.627379  | -0.414997 | -1.274644 |
| 24 | 1 | 0 | 4.693006  | -1.633089 | 0.028365  |
| 25 | 6 | 0 | 3.596905  | 0.461230  | 1.223068  |
| 26 | 1 | 0 | 4.394493  | 1.095067  | 0.828293  |
| 27 | 1 | 0 | 2.818047  | 1.075732  | 1.666571  |
| 28 | 1 | 0 | 4.007857  | -0.214394 | 1.977907  |
| 29 | 1 | 0 | 0.395880  | -1.363202 | -1.039118 |
| 30 | 6 | 0 | -3.454090 | 3.609128  | -0.751293 |
| 31 | 8 | 0 | -4.622731 | 2.935969  | -0.901449 |
| 32 | 6 | 0 | -5.686409 | 3.838267  | -1.216646 |
| 33 | 1 | 0 | -6.597586 | 3.289228  | -1.331593 |
| 34 | 1 | 0 | -5.796385 | 4.550245  | -0.425512 |
| 35 | 1 | 0 | -5.461153 | 4.350474  | -2.128679 |
| 36 | 8 | 0 | -3.476398 | 4.858173  | -0.902816 |
| 37 | 1 | 0 | -4.370140 | 5.139754  | -1.111469 |

---

### Diprotonation of carbamate 1f (SM-2H<sup>+</sup>)

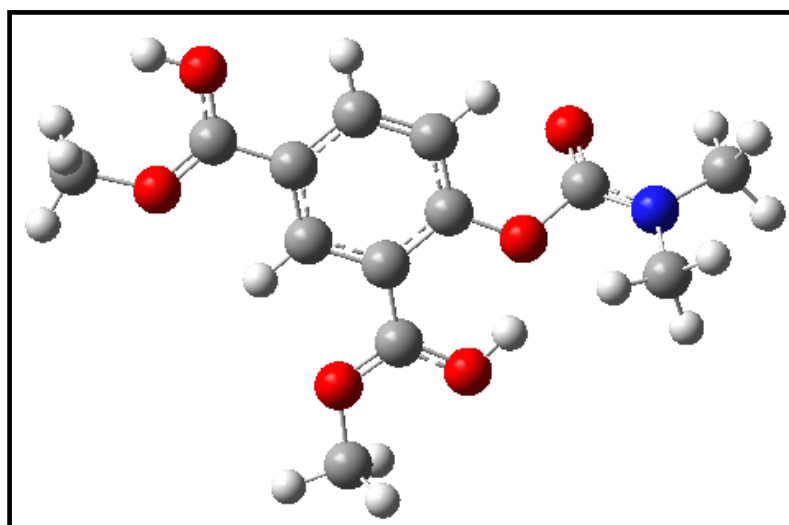

HF = -1011.3951975 (B3LYP/6-31+G(d))

HF = -1011.0208974 (M06/6-311++G(d,p))

HF = -1011.2434414 (M06-2X/6-311++G(d,p))

HF = -1011.3509331 (M06-HF/6-311++G(d,p))

HF = -1011.6562944 (B3LYP/6-311++G(d,p))

HF = -1011.2536199 (B3PW91/6-311++G(d,p))

HF = -1005.7768545 (MP2/6-311++G(d,p))

HF = -1005.6492891 (MP2/aug-ccVDZ)

ZPE = 0.299051 (Hartree/Particle)

Thermal correction to Gibbs Free Energy = 0.247918 (Hartree/Particle)

NIMAG = 0

---

| Center | Atomic | Atomic | Coordinates (Angstroms) |           |           |
|--------|--------|--------|-------------------------|-----------|-----------|
| Number | Number | Type   | X                       | Y         | Z         |
| 1      | 7      | 0      | 4.120261                | -0.951559 | -0.124565 |
| 2      | 6      | 0      | 2.964332                | -0.986969 | 0.537438  |
| 3      | 8      | 0      | 2.661553                | -1.586290 | 1.548908  |
| 4      | 8      | 0      | 1.996594                | -0.104957 | -0.085467 |
| 5      | 6      | 0      | 0.668267                | -0.387853 | -0.020657 |
| 6      | 6      | 0      | -0.232114               | 0.712055  | 0.012306  |
| 7      | 6      | 0      | 0.182850                | -1.699446 | -0.053171 |

---

|    |   |   |           |           |           |
|----|---|---|-----------|-----------|-----------|
| 8  | 6 | 0 | -1.611534 | 0.468334  | 0.010239  |
| 9  | 6 | 0 | -1.182113 | -1.925842 | -0.052033 |
| 10 | 1 | 0 | 0.872256  | -2.532787 | -0.089929 |
| 11 | 6 | 0 | -2.088956 | -0.843222 | -0.018115 |
| 12 | 1 | 0 | -2.300196 | 1.303560  | 0.033076  |
| 13 | 1 | 0 | -1.551280 | -2.944301 | -0.088013 |
| 14 | 6 | 0 | 0.233220  | 2.095465  | 0.056573  |
| 15 | 8 | 0 | 1.478224  | 2.440061  | 0.041901  |
| 16 | 8 | 0 | -0.648278 | 3.024134  | 0.116945  |
| 17 | 6 | 0 | -0.238595 | 4.436688  | 0.170214  |
| 18 | 1 | 0 | 0.354675  | 4.594659  | 1.070449  |
| 19 | 1 | 0 | 0.327741  | 4.671425  | -0.730521 |
| 20 | 1 | 0 | -1.178774 | 4.979646  | 0.207856  |
| 21 | 6 | 0 | 5.282597  | -1.631728 | 0.458787  |
| 22 | 1 | 0 | 5.038293  | -1.984803 | 1.459205  |
| 23 | 1 | 0 | 5.567929  | -2.480539 | -0.171068 |
| 24 | 1 | 0 | 6.118002  | -0.926968 | 0.511721  |
| 25 | 1 | 0 | 2.061311  | 1.639387  | -0.008320 |
| 26 | 6 | 0 | 4.349862  | -0.258536 | -1.398906 |
| 27 | 1 | 0 | 3.411297  | -0.086593 | -1.921620 |
| 28 | 1 | 0 | 4.859078  | 0.695996  | -1.226297 |
| 29 | 1 | 0 | 4.987104  | -0.893863 | -2.019405 |
| 30 | 6 | 0 | -3.520455 | -1.091989 | -0.021809 |
| 31 | 8 | 0 | -4.318961 | -0.087207 | -0.029063 |
| 32 | 6 | 0 | -5.782496 | -0.226317 | -0.032913 |
| 33 | 1 | 0 | -6.098669 | -0.722407 | 0.886332  |
| 34 | 1 | 0 | -6.142473 | 0.798546  | -0.056281 |
| 35 | 1 | 0 | -6.091493 | -0.760311 | -0.933414 |
| 36 | 8 | 0 | -3.907535 | -2.329628 | -0.018572 |
| 37 | 1 | 0 | -4.874942 | -2.471239 | -0.025652 |

---



### TS-cleavage of C-O bond in deprotonated carbamate 1f (TS-2H<sup>+</sup>)

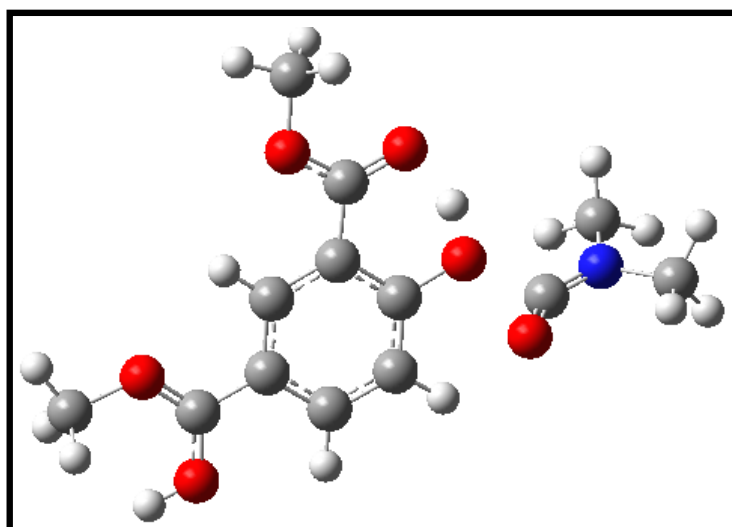

HF = -1011.3737261 (B3LYP/6-31+G(d))

HF = -1010.9976380 (M06/6-311++G(d,p))

HF = -1011.2201845 (M06-2X/6-311++G(d,p))

HF = -1011.3282710 (M06-HF/6-311++G(d,p))

HF = -1011.6378803 (B3LYP/6-311++G(d,p))

HF = -1011.2334248 (B3PW91/6-311++G(d,p))

HF = -1005.7399098 (MP2/6-311++G(d,p))

HF = -1005.6123368 (MP2/aug-ccVDZ)

ZPE = 0.295783 (Hartree/Particle)

Thermal correction to Gibbs Free Energy = 0.244747 (Hartree/Particle)

NIMAG = 1 (153.80i)

---

| Center<br>Number | Atomic<br>Number | Atomic<br>Type | Coordinates (Angstroms) |           |           |
|------------------|------------------|----------------|-------------------------|-----------|-----------|
|                  |                  |                | X                       | Y         | Z         |
| 1                | 7                | 0              | -3.309015               | -0.338827 | 0.027045  |
| 2                | 6                | 0              | -2.352833               | 0.175698  | 0.734282  |
| 3                | 8                | 0              | -2.074476               | 0.661231  | 1.767635  |
| 4                | 8                | 0              | -0.871961               | 0.058244  | -0.341596 |
| 5                | 6                | 0              | 0.184122                | 0.889534  | -0.039619 |
| 6                | 6                | 0              | 1.450959                | 0.311233  | 0.207535  |
| 7                | 6                | 0              | -0.009924               | 2.269617  | -0.012621 |
| 8                | 6                | 0              | 2.530851                | 1.148534  | 0.473972  |

---

|    |   |   |           |           |           |
|----|---|---|-----------|-----------|-----------|
| 9  | 6 | 0 | 1.070972  | 3.094595  | 0.261697  |
| 10 | 1 | 0 | -0.988945 | 2.688923  | -0.214020 |
| 11 | 6 | 0 | 2.344542  | 2.538735  | 0.504008  |
| 12 | 1 | 0 | 3.507374  | 0.717636  | 0.657039  |
| 13 | 1 | 0 | 0.931945  | 4.169231  | 0.280972  |
| 14 | 6 | 0 | 1.583466  | -1.163506 | 0.154781  |
| 15 | 8 | 0 | 0.611260  | -1.886538 | -0.133840 |
| 16 | 8 | 0 | 2.776509  | -1.630149 | 0.426956  |
| 17 | 6 | 0 | 2.968400  | -3.074862 | 0.381283  |
| 18 | 1 | 0 | 2.323158  | -3.549401 | 1.121775  |
| 19 | 1 | 0 | 2.740540  | -3.439346 | -0.621222 |
| 20 | 1 | 0 | 4.018650  | -3.219871 | 0.623854  |
| 21 | 6 | 0 | -4.607695 | -0.542255 | 0.727078  |
| 22 | 1 | 0 | -4.505359 | -0.288418 | 1.780878  |
| 23 | 1 | 0 | -5.356801 | 0.098118  | 0.256246  |
| 24 | 1 | 0 | -4.884884 | -1.593241 | 0.621623  |
| 25 | 1 | 0 | -0.466316 | -0.921930 | -0.324376 |
| 26 | 6 | 0 | -3.251323 | -0.772624 | -1.385791 |
| 27 | 1 | 0 | -2.514809 | -0.190834 | -1.932582 |
| 28 | 1 | 0 | -3.016786 | -1.839199 | -1.432785 |
| 29 | 1 | 0 | -4.240426 | -0.596752 | -1.809632 |
| 30 | 6 | 0 | 3.475052  | 3.406712  | 0.782148  |
| 31 | 8 | 0 | 4.624563  | 2.868045  | 0.977559  |
| 32 | 6 | 0 | 5.834580  | 3.649974  | 1.257854  |
| 33 | 1 | 0 | 5.687537  | 4.230990  | 2.169592  |
| 34 | 1 | 0 | 6.605151  | 2.898575  | 1.406974  |
| 35 | 1 | 0 | 6.067881  | 4.270983  | 0.391561  |
| 36 | 8 | 0 | 3.259111  | 4.685763  | 0.817556  |
| 37 | 1 | 0 | 4.043213  | 5.238773  | 1.008641  |

---

After cleavage of C-O bond to generate monoprotanated diester and dimethyl isocyanate cation (PM-2H<sup>+</sup>)

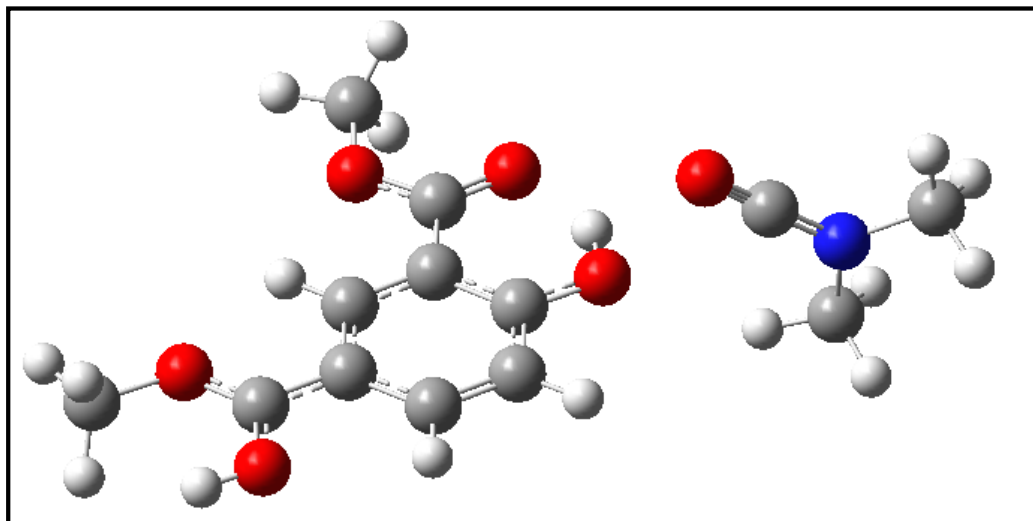

HF = -1011.3851069 (B3LYP/6-31+G(d))

HF = -1011.0110822 (M06/6-311++G(d,p))

HF = -1011.2284163 (M06-2X/6-311++G(d,p))

HF = -1011.3299912 (M06-HF/6-311++G(d,p))

HF = -1011.6514725 (B3LYP/6-311++G(d,p))

HF = -1005.6447781 (B3PW91/6-311++G(d,p))

HF = -1005.7734016 (MP2/6-311++G(d,p))

HF = -1011.2445806 (MP2/aug-ccVDZ)

ZPE = 0.296359 (Hartree/Particle)

Thermal correction to Gibbs Free Energy = 0.240461 (Hartree/Particle)

NIMAG = 0

| Center Number | Atomic Number | Atomic Type | Coordinates (Angstroms) |           |           |
|---------------|---------------|-------------|-------------------------|-----------|-----------|
|               |               |             | X                       | Y         | Z         |
| 1             | 7             | 0           | 5.073973                | -0.884093 | 0.100600  |
| 2             | 6             | 0           | 4.156258                | -0.913027 | 0.963025  |
| 3             | 8             | 0           | 3.335316                | -0.943836 | 1.766114  |
| 4             | 8             | 0           | 1.637155                | 0.457775  | -0.560830 |
| 5             | 6             | 0           | 0.373918                | 0.043167  | -0.440767 |
| 6             | 6             | 0           | -0.696911               | 0.943841  | -0.167254 |
| 7             | 6             | 0           | 0.117733                | -1.334970 | -0.592399 |

|    |   |   |           |           |           |
|----|---|---|-----------|-----------|-----------|
| 8  | 6 | 0 | -1.989593 | 0.442934  | -0.049100 |
| 9  | 6 | 0 | -1.166932 | -1.817309 | -0.473927 |
| 10 | 1 | 0 | 0.949353  | -1.998947 | -0.801942 |
| 11 | 6 | 0 | -2.240218 | -0.931554 | -0.198219 |
| 12 | 1 | 0 | -2.803811 | 1.125462  | 0.160506  |
| 13 | 1 | 0 | -1.356270 | -2.878342 | -0.590165 |
| 14 | 6 | 0 | -0.404204 | 2.388509  | -0.013750 |
| 15 | 8 | 0 | 0.737207  | 2.850111  | -0.115389 |
| 16 | 8 | 0 | -1.470855 | 3.135095  | 0.240473  |
| 17 | 6 | 0 | -1.258859 | 4.561204  | 0.404862  |
| 18 | 1 | 0 | -0.588597 | 4.740575  | 1.247479  |
| 19 | 1 | 0 | -0.838734 | 4.980886  | -0.510993 |
| 20 | 1 | 0 | -2.248340 | 4.969789  | 0.601492  |
| 21 | 6 | 0 | 6.491898  | -1.153059 | 0.509208  |
| 22 | 1 | 0 | 6.536943  | -1.326888 | 1.583468  |
| 23 | 1 | 0 | 6.824343  | -2.036411 | -0.037118 |
| 24 | 1 | 0 | 7.077129  | -0.273504 | 0.239505  |
| 25 | 1 | 0 | 1.649023  | 1.446582  | -0.431461 |
| 26 | 6 | 0 | 4.773919  | -0.603566 | -1.341314 |
| 27 | 1 | 0 | 3.710962  | -0.397009 | -1.455430 |
| 28 | 1 | 0 | 5.367675  | 0.265295  | -1.627894 |
| 29 | 1 | 0 | 5.064449  | -1.487562 | -1.910271 |
| 30 | 6 | 0 | -3.579554 | -1.435671 | -0.065573 |
| 31 | 8 | 0 | -4.536400 | -0.608526 | 0.199961  |
| 32 | 6 | 0 | -5.927757 | -1.035394 | 0.353322  |
| 33 | 1 | 0 | -6.011962 | -1.699814 | 1.215676  |
| 34 | 1 | 0 | -6.471147 | -0.111760 | 0.534957  |
| 35 | 1 | 0 | -6.273027 | -1.500772 | -0.572025 |
| 36 | 8 | 0 | -3.767766 | -2.717150 | -0.219543 |
| 37 | 1 | 0 | -4.690069 | -3.018379 | -0.106589 |

---

### Monoprotonation of carbamate 1f (SM<sub>0</sub>-H<sup>+</sup>)

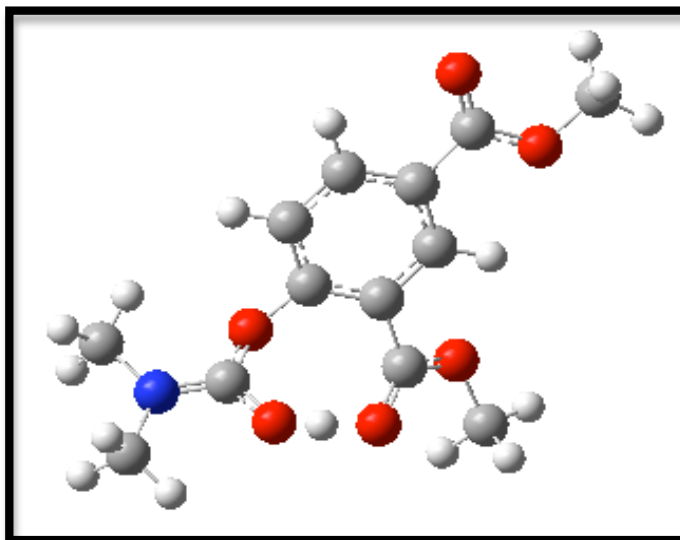

HF = -1010.637221 (M06/6-311++G(d,p))

HF = -1010.865624 (M06-2X/6-311++G(d,p))

HF = -1008.554059 (MP2/6-311++G(d,p))

ZPE = 0.285978 (Hartree/Particle)

Thermal correction to Gibbs Free Energy = 0.234873 (Hartree/Particle)

NIMAG = 0

---

| Center | Atomic | Atomic | Coordinates (Angstroms) |           |           |
|--------|--------|--------|-------------------------|-----------|-----------|
| Number | Number | Type   | X                       | Y         | Z         |
| 1      | 7      | 0      | 3.053131                | -0.341351 | 0.115094  |
| 2      | 6      | 0      | 1.777956                | -0.387476 | -0.173143 |
| 3      | 8      | 0      | 1.346663                | -1.014087 | -1.225136 |
| 4      | 8      | 0      | 0.916936                | 0.185729  | 0.672576  |
| 5      | 6      | 0      | -0.167558               | 0.972831  | 0.199595  |
| 6      | 6      | 0      | -1.443913               | 0.423061  | 0.001851  |
| 7      | 6      | 0      | 0.062588                | 2.339277  | 0.103411  |
| 8      | 6      | 0      | -2.501051               | 1.301725  | -0.292293 |
| 9      | 6      | 0      | -0.997343               | 3.191061  | -0.218160 |
| 10     | 1      | 0      | 1.056417                | 2.731114  | 0.292195  |
| 11     | 6      | 0      | -2.280061               | 2.672625  | -0.410386 |
| 12     | 1      | 0      | -3.493340               | 0.892422  | -0.446674 |
| 13     | 1      | 0      | -0.816931               | 4.258153  | -0.302692 |

---

|    |   |   |           |           |           |
|----|---|---|-----------|-----------|-----------|
| 14 | 6 | 0 | -1.698878 | -1.040462 | 0.021309  |
| 15 | 8 | 0 | -0.903061 | -1.884681 | -0.409712 |
| 16 | 8 | 0 | -2.881217 | -1.364106 | 0.507741  |
| 17 | 6 | 0 | -3.257740 | -2.769233 | 0.482509  |
| 18 | 1 | 0 | -3.254925 | -3.131472 | -0.546834 |
| 19 | 1 | 0 | -2.561190 | -3.345827 | 1.093055  |
| 20 | 1 | 0 | -4.260453 | -2.794632 | 0.904217  |
| 21 | 6 | 0 | 4.036892  | -1.107785 | -0.668997 |
| 22 | 1 | 0 | 3.527950  | -1.822009 | -1.311994 |
| 23 | 1 | 0 | 4.627379  | -0.414997 | -1.274644 |
| 24 | 1 | 0 | 4.693006  | -1.633089 | 0.028365  |
| 25 | 6 | 0 | 3.596905  | 0.461230  | 1.223068  |
| 26 | 1 | 0 | 4.394493  | 1.095067  | 0.828293  |
| 27 | 1 | 0 | 2.818047  | 1.075732  | 1.666571  |
| 28 | 1 | 0 | 4.007857  | -0.214394 | 1.977907  |
| 29 | 1 | 0 | 0.395880  | -1.363202 | -1.039118 |
| 30 | 6 | 0 | -3.454090 | 3.609128  | -0.751293 |
| 31 | 8 | 0 | -4.622731 | 2.935969  | -0.901449 |
| 32 | 6 | 0 | -5.686409 | 3.838267  | -1.216646 |
| 33 | 1 | 0 | -6.597586 | 3.289228  | -1.331593 |
| 34 | 1 | 0 | -5.796385 | 4.550245  | -0.425512 |
| 35 | 1 | 0 | -5.461153 | 4.350474  | -2.128679 |
| 36 | 8 | 0 | -3.476398 | 4.858173  | -0.902816 |

---

## Monoprotonation of carbamate 1f (SM-H<sup>+</sup>)

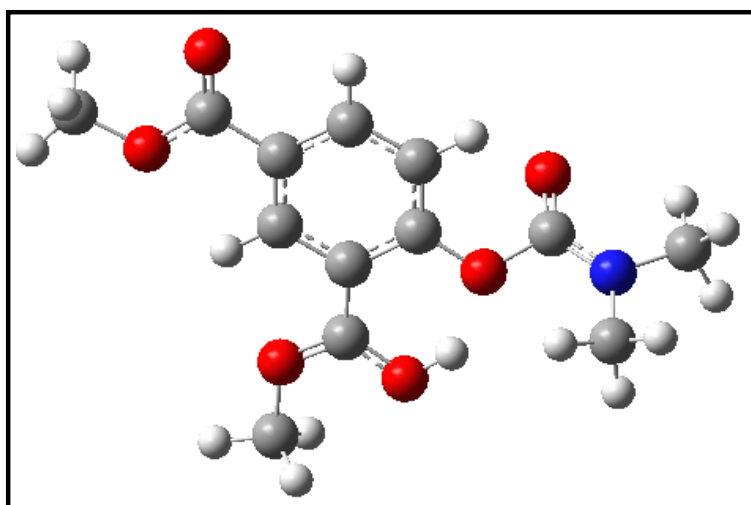

HF = -1011.0071535 (B3LYP/6-31+G(d))

HF = -1010.6306780 (M06/6-311++G(d,p))

HF = -1010.8552520 (M06-2X/6-311++G(d,p))

HF = -1010.9656815 (M06-HF/6-311++G(d,p))

HF = -1011.2635764 (B3LYP/6-311++G(d,p))

HF = -1010.8591816 (B3PW91/6-311++G(d,p))

HF = -1005.3768291 (MP2/6-311++G(d,p))

HF = -1005.2479501 (MP2/aug-ccVDZ)

ZPE = 0.286493 (Hartree/Particle)

Thermal correction to Gibbs Free Energy = 0.235224 (Hartree/Particle)

NIMAG = 0

---

| Center<br>Number | Atomic<br>Number | Atomic<br>Type | Coordinates (Angstroms) |           |           |
|------------------|------------------|----------------|-------------------------|-----------|-----------|
|                  |                  |                | X                       | Y         | Z         |
| 1                | 7                | 0              | 4.143023                | -0.892706 | -0.049957 |
| 2                | 6                | 0              | 2.947083                | -0.934048 | 0.544879  |
| 3                | 8                | 0              | 2.617178                | -1.502417 | 1.568629  |
| 4                | 8                | 0              | 1.998094                | -0.130785 | -0.172554 |
| 5                | 6                | 0              | 0.657066                | -0.419211 | -0.080801 |
| 6                | 6                | 0              | -0.249596               | 0.668838  | -0.018772 |
| 7                | 6                | 0              | 0.182470                | -1.728595 | -0.121381 |
| 8                | 6                | 0              | -1.634192               | 0.408475  | 0.005761  |

---

|    |   |   |           |           |           |
|----|---|---|-----------|-----------|-----------|
| 9  | 6 | 0 | -1.187333 | -1.961297 | -0.092947 |
| 10 | 1 | 0 | 0.878577  | -2.556090 | -0.180040 |
| 11 | 6 | 0 | -2.105733 | -0.898616 | -0.026478 |
| 12 | 1 | 0 | -2.328708 | 1.237415  | 0.048056  |
| 13 | 1 | 0 | -1.560599 | -2.979196 | -0.130034 |
| 14 | 6 | 0 | 0.204418  | 2.049144  | 0.018627  |
| 15 | 8 | 0 | 1.447844  | 2.405800  | -0.044894 |
| 16 | 8 | 0 | -0.677875 | 2.978463  | 0.120376  |
| 17 | 6 | 0 | -0.267098 | 4.388063  | 0.156141  |
| 18 | 1 | 0 | 0.365211  | 4.549278  | 1.028987  |
| 19 | 1 | 0 | 0.259443  | 4.626414  | -0.767745 |
| 20 | 1 | 0 | -1.204046 | 4.932668  | 0.235040  |
| 21 | 6 | 0 | 5.290570  | -1.498324 | 0.632749  |
| 22 | 1 | 0 | 4.991189  | -1.838383 | 1.622656  |
| 23 | 1 | 0 | 5.661596  | -2.347987 | 0.050130  |
| 24 | 1 | 0 | 6.087488  | -0.753581 | 0.726180  |
| 25 | 1 | 0 | 2.029169  | 1.604974  | -0.121907 |
| 26 | 6 | 0 | 4.426038  | -0.240602 | -1.333780 |
| 27 | 1 | 0 | 3.515254  | -0.125068 | -1.917692 |
| 28 | 1 | 0 | 4.888245  | 0.739768  | -1.171260 |
| 29 | 1 | 0 | 5.123787  | -0.872392 | -1.889834 |
| 30 | 6 | 0 | -3.565940 | -1.216639 | -0.000517 |
| 31 | 8 | 0 | -4.329687 | -0.118740 | 0.066937  |
| 32 | 6 | 0 | -5.761818 | -0.322486 | 0.100672  |
| 33 | 1 | 0 | -6.035120 | -0.904139 | 0.983768  |
| 34 | 1 | 0 | -6.189965 | 0.677586  | 0.149363  |
| 35 | 1 | 0 | -6.087004 | -0.839486 | -0.804664 |
| 36 | 8 | 0 | -4.007716 | -2.353954 | -0.035731 |

---



### TS-cleavage of C-O bond in monoprotonated carbamate 1f (TS-H<sup>+</sup>)

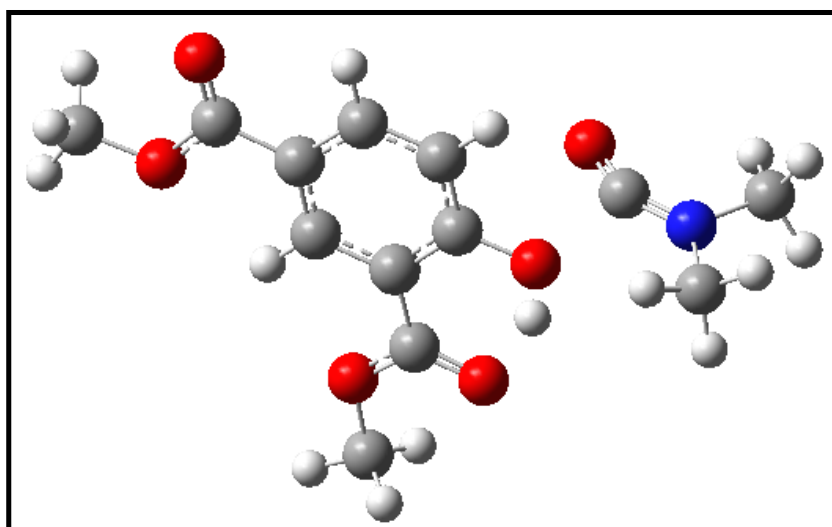

HF = -1010.9835863 (B3LYP/6-31+G(d))

HF = -1010.6068647 (M06/6-311++G(d,p))

HF = -1010.8285192 (M06-2X/6-311++G(d,p))

HF = -1010.9370624 (M06-HF/6-311++G(d,p))

HF = -1011.2434975 (B3LYP/6-311++G(d,p))

HF = -1010.8359288 (B3PW91/6-311++G(d,p))

HF = -1005.3418841 (MP2/6-311++G(d,p))

HF = -1005.2124406 (MP2/aug-ccVDZ)

ZPE = 0.284233 (Hartree/Particle)

Thermal correction to Gibbs Free Energy = 0.233094 (Hartree/Particle)

NIMAG = 1 (110.62i)

---

| Center<br>Number | Atomic<br>Number | Atomic<br>Type | Coordinates (Angstroms) |           |           |
|------------------|------------------|----------------|-------------------------|-----------|-----------|
|                  |                  |                | X                       | Y         | Z         |
| 1                | 7                | 0              | 4.217117                | -0.932619 | 0.074151  |
| 2                | 6                | 0              | 3.052328                | -0.995323 | 0.614810  |
| 3                | 8                | 0              | 2.355428                | -1.293094 | 1.501831  |
| 4                | 8                | 0              | 1.865255                | -0.111251 | -0.753058 |
| 5                | 6                | 0              | 0.518162                | -0.338655 | -0.565946 |
| 6                | 6                | 0              | -0.345490               | 0.734140  | -0.250348 |
| 7                | 6                | 0              | 0.032304                | -1.637283 | -0.706871 |
| 8                | 6                | 0              | -1.711104               | 0.472677  | -0.083943 |

---

|    |   |   |           |           |           |
|----|---|---|-----------|-----------|-----------|
| 9  | 6 | 0 | -1.326356 | -1.875351 | -0.531633 |
| 10 | 1 | 0 | 0.712061  | -2.444705 | -0.957829 |
| 11 | 6 | 0 | -2.206882 | -0.826369 | -0.218597 |
| 12 | 1 | 0 | -2.380796 | 1.290273  | 0.150186  |
| 13 | 1 | 0 | -1.718327 | -2.880939 | -0.639944 |
| 14 | 6 | 0 | 0.215350  | 2.098222  | -0.131977 |
| 15 | 8 | 0 | 1.415914  | 2.338709  | -0.336454 |
| 16 | 8 | 0 | -0.658406 | 3.030592  | 0.202426  |
| 17 | 6 | 0 | -0.169237 | 4.393206  | 0.324639  |
| 18 | 1 | 0 | 0.592458  | 4.442414  | 1.104654  |
| 19 | 1 | 0 | 0.241124  | 4.724238  | -0.630880 |
| 20 | 1 | 0 | -1.044717 | 4.979303  | 0.597128  |
| 21 | 6 | 0 | 5.365129  | -1.304222 | 0.958588  |
| 22 | 1 | 0 | 5.015976  | -1.449655 | 1.979781  |
| 23 | 1 | 0 | 5.807768  | -2.224740 | 0.573582  |
| 24 | 1 | 0 | 6.085135  | -0.484720 | 0.923544  |
| 25 | 1 | 0 | 1.990339  | 0.897914  | -0.659725 |
| 26 | 6 | 0 | 4.557847  | -0.532251 | -1.310756 |
| 27 | 1 | 0 | 3.700029  | -0.664944 | -1.962182 |
| 28 | 1 | 0 | 4.890314  | 0.508440  | -1.310399 |
| 29 | 1 | 0 | 5.372264  | -1.181690 | -1.633795 |
| 30 | 6 | 0 | -3.654984 | -1.142714 | -0.043531 |
| 31 | 8 | 0 | -4.390356 | -0.058011 | 0.243052  |
| 32 | 6 | 0 | -5.808602 | -0.264886 | 0.432871  |
| 33 | 1 | 0 | -5.979433 | -0.947156 | 1.268562  |
| 34 | 1 | 0 | -6.213339 | 0.722124  | 0.652520  |
| 35 | 1 | 0 | -6.253588 | -0.670807 | -0.478356 |
| 36 | 8 | 0 | -4.121544 | -2.267002 | -0.148866 |

---

After cleavage of C-O bond to generate neutral diester and dimethyl isocyanate cation (PM-H<sup>+</sup>)

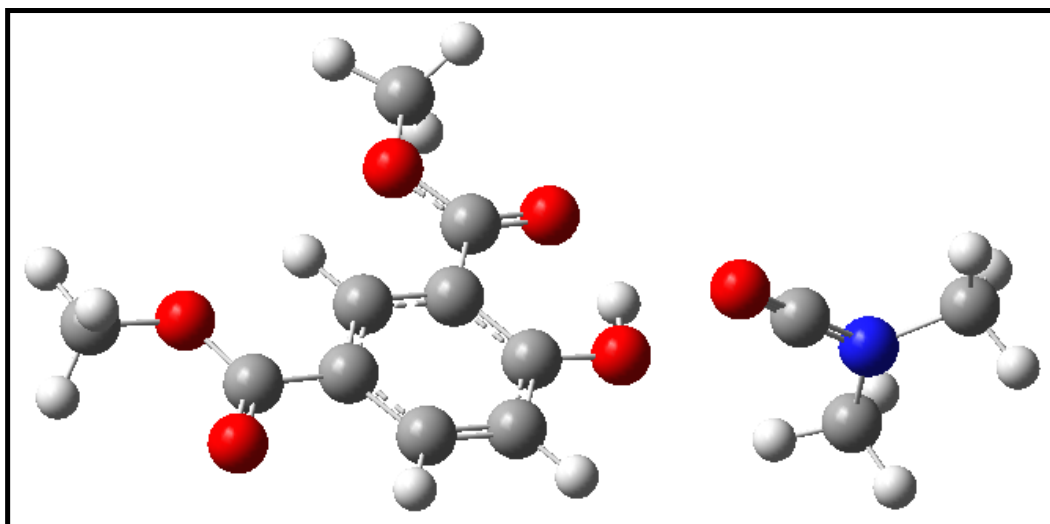

HF = -1010.9886583 (B3LYP/6-31+G(d))

HF = -1010.6134014 (M06/6-311++G(d,p))

HF = -1010.8332433 (M06-2X/6-311++G(d,p))

HF = -1010.9382821 (M06-HF/6-311++G(d,p))

HF = -1011.2505020 (B3LYP/6-311++G(d,p))

HF = -1010.8415436 (B3PW91/6-311++G(d,p))

HF = -1005.3657122 (MP2/6-311++G(d,p))

HF = -1005.2353747 (MP2/aug-ccVDZ)

ZPE = 0.283866 (Hartree/Particle)

Thermal correction to Gibbs Free Energy = 0.22811 (Hartree/Particle)

NIMAG = 0

| Center Number | Atomic Number | Atomic Type | Coordinates (Angstroms) |           |           |
|---------------|---------------|-------------|-------------------------|-----------|-----------|
|               |               |             | X                       | Y         | Z         |
| 1             | 7             | 0           | 4.871263                | -0.843813 | 0.194768  |
| 2             | 6             | 0           | 3.845740                | -1.085924 | 0.885992  |
| 3             | 8             | 0           | 2.937302                | -1.319598 | 1.549322  |
| 4             | 8             | 0           | 1.654465                | 0.232423  | -0.826804 |
| 5             | 6             | 0           | 0.370333                | -0.129118 | -0.618705 |
| 6             | 6             | 0           | -0.635024               | 0.810048  | -0.268408 |
| 7             | 6             | 0           | 0.039473                | -1.486651 | -0.757716 |

|    |   |   |           |           |           |
|----|---|---|-----------|-----------|-----------|
| 8  | 6 | 0 | -1.947875 | 0.359943  | -0.063417 |
| 9  | 6 | 0 | -1.263566 | -1.907448 | -0.550364 |
| 10 | 1 | 0 | 0.819625  | -2.190130 | -1.030478 |
| 11 | 6 | 0 | -2.274378 | -0.989890 | -0.198982 |
| 12 | 1 | 0 | -2.712653 | 1.078014  | 0.203730  |
| 13 | 1 | 0 | -1.518040 | -2.956819 | -0.657855 |
| 14 | 6 | 0 | -0.275013 | 2.236093  | -0.134271 |
| 15 | 8 | 0 | 0.871499  | 2.663439  | -0.318946 |
| 16 | 8 | 0 | -1.290351 | 3.029621  | 0.201782  |
| 17 | 6 | 0 | -1.005290 | 4.442553  | 0.344961  |
| 18 | 1 | 0 | -0.261063 | 4.595880  | 1.129009  |
| 19 | 1 | 0 | -0.644159 | 4.848105  | -0.602321 |
| 20 | 1 | 0 | -1.956652 | 4.894323  | 0.621222  |
| 21 | 6 | 0 | 6.214882  | -0.782522 | 0.860044  |
| 22 | 1 | 0 | 6.107063  | -0.980987 | 1.925834  |
| 23 | 1 | 0 | 6.841567  | -1.542309 | 0.391791  |
| 24 | 1 | 0 | 6.613345  | 0.219070  | 0.695328  |
| 25 | 1 | 0 | 1.710208  | 1.217111  | -0.703185 |
| 26 | 6 | 0 | 4.788767  | -0.649129 | -1.288707 |
| 27 | 1 | 0 | 3.744161  | -0.645483 | -1.593783 |
| 28 | 1 | 0 | 5.254169  | 0.312029  | -1.509837 |
| 29 | 1 | 0 | 5.334754  | -1.469955 | -1.755303 |
| 30 | 6 | 0 | -3.654352 | -1.497977 | 0.014242  |
| 31 | 8 | 0 | -4.525010 | -0.527004 | 0.344989  |
| 32 | 6 | 0 | -5.892162 | -0.932040 | 0.573669  |
| 33 | 1 | 0 | -5.941306 | -1.644591 | 1.400398  |
| 34 | 1 | 0 | -6.423365 | -0.014868 | 0.825534  |
| 35 | 1 | 0 | -6.308668 | -1.382135 | -0.330527 |
| 36 | 8 | 0 | -3.976283 | -2.673653 | -0.095713 |

---

### Monoprotonation of ester 1e (SM<sub>0</sub>-Me)

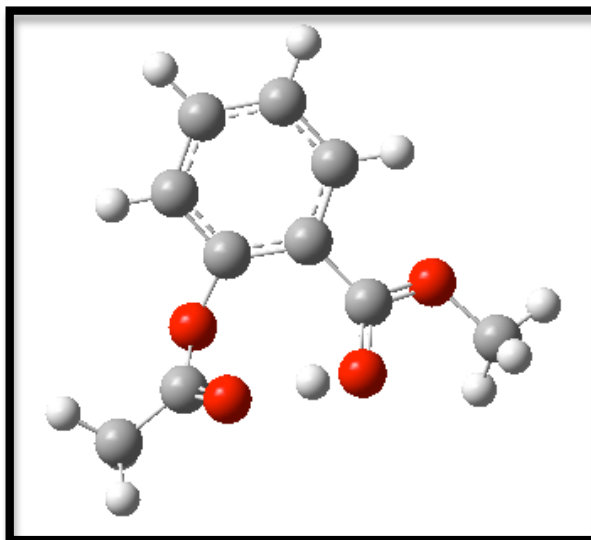

HF = -688.1694373 (M06/6-311++G(d,p))

HF = -688.3307554 (M06-2X/6-311++G(d,p))

HF = -686.7412388 (MP2/6-311++G(d,p))

ZPE = 0.197266 (Hartree/Particle)

Thermal correction to Gibbs Free Energy = 0.157108 (Hartree/Particle)

NIMAG = 0

---

| Center | Atomic | Atomic | Coordinates (Angstroms) |           |           |
|--------|--------|--------|-------------------------|-----------|-----------|
| Number | Number | Type   | X                       | Y         | Z         |
| 1      | 6      | 0      | 1.777956                | -0.387476 | -0.173143 |
| 2      | 8      | 0      | 1.346663                | -1.014087 | -1.225136 |
| 3      | 8      | 0      | 0.916936                | 0.185729  | 0.672576  |
| 4      | 6      | 0      | -0.167558               | 0.972831  | 0.199595  |
| 5      | 6      | 0      | -1.443913               | 0.423061  | 0.001851  |
| 6      | 6      | 0      | 0.062588                | 2.339277  | 0.103411  |
| 7      | 6      | 0      | -2.501051               | 1.301725  | -0.292293 |
| 8      | 6      | 0      | -0.997343               | 3.191061  | -0.218160 |
| 9      | 1      | 0      | 1.056417                | 2.731114  | 0.292195  |
| 10     | 6      | 0      | -2.280061               | 2.672625  | -0.410386 |
| 11     | 1      | 0      | -3.493340               | 0.892423  | -0.446674 |
| 12     | 1      | 0      | -0.816930               | 4.258153  | -0.302692 |
| 13     | 1      | 0      | -3.107453               | 3.332621  | -0.650639 |

|    |   |   |           |           |           |
|----|---|---|-----------|-----------|-----------|
| 14 | 6 | 0 | -1.698878 | -1.040462 | 0.021309  |
| 15 | 8 | 0 | -0.903061 | -1.884681 | -0.409712 |
| 16 | 8 | 0 | -2.881217 | -1.364106 | 0.507741  |
| 17 | 6 | 0 | -3.257740 | -2.769233 | 0.482509  |
| 18 | 1 | 0 | -3.254925 | -3.131472 | -0.546834 |
| 19 | 1 | 0 | -2.561190 | -3.345827 | 1.093055  |
| 20 | 1 | 0 | -4.260453 | -2.794631 | 0.904217  |
| 21 | 1 | 0 | 0.395880  | -1.363202 | -1.039118 |
| 22 | 6 | 0 | 3.098986  | -0.339692 | 0.125459  |
| 23 | 1 | 0 | 3.545252  | -1.290679 | -0.077938 |
| 24 | 1 | 0 | 3.572618  | 0.411527  | -0.471402 |
| 25 | 1 | 0 | 3.222109  | -0.102197 | 1.161479  |

---

### Monoprotonation of ester 1e (SM-Me)

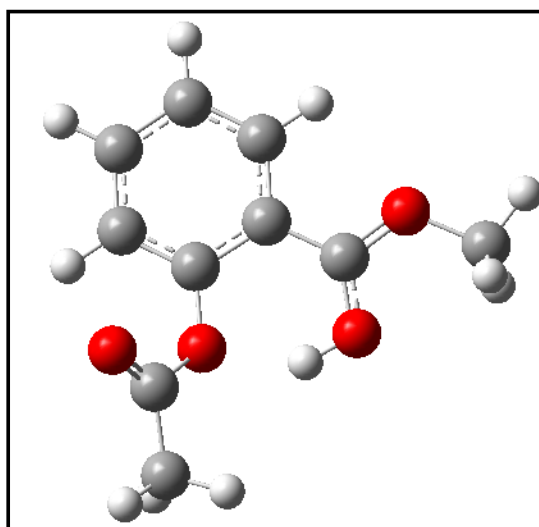

HF = -688.44431060 (B3LYP/6-31+G(d))

HF = -688.17362201 (M06/6-311++G(d,p))

HF = -688.33463960 (M06-2X/6-311++G(d,p))

HF = -686.74500337 (MP2/6-311++G(d,p))

ZPE = 0.197989 (Hartree/Particle)

Thermal correction to Gibbs Free Energy = 0.157408 (Hartree/Particle)

NIMAG = 0

| Center<br>Number | Atomic<br>Number | Atomic<br>Type | Coordinates (Angstroms) |           |           |
|------------------|------------------|----------------|-------------------------|-----------|-----------|
|                  |                  |                | X                       | Y         | Z         |
| 1                | 6                | 0              | -2.440291               | -0.981320 | 0.247074  |
| 2                | 8                | 0              | -2.856629               | -0.287952 | 1.133903  |
| 3                | 8                | 0              | -1.269400               | -0.640516 | -0.472309 |
| 4                | 6                | 0              | -0.639354               | 0.582901  | -0.264442 |
| 5                | 6                | 0              | 0.763195                | 0.584667  | -0.068541 |
| 6                | 6                | 0              | -1.348027               | 1.776462  | -0.318761 |
| 7                | 6                | 0              | 1.428793                | 1.819845  | 0.093452  |
| 8                | 6                | 0              | -0.666853               | 2.984679  | -0.156053 |
| 9                | 1                | 0              | -2.417285               | 1.765331  | -0.489881 |
| 10               | 6                | 0              | 0.717576                | 3.009897  | 0.055270  |
| 11               | 1                | 0              | 2.502996                | 1.825374  | 0.235972  |
| 12               | 1                | 0              | -1.225595               | 3.914412  | -0.202279 |
| 13               | 1                | 0              | 1.235950                | 3.954929  | 0.177299  |
| 14               | 6                | 0              | 1.543478                | -0.639665 | -0.060198 |
| 15               | 8                | 0              | 1.061741                | -1.811892 | -0.332548 |
| 16               | 8                | 0              | 2.795865                | -0.564556 | 0.223066  |
| 17               | 6                | 0              | 3.628581                | -1.773893 | 0.226331  |
| 18               | 1                | 0              | 3.257447                | -2.454758 | 0.992504  |
| 19               | 1                | 0              | 3.596987                | -2.230384 | -0.762650 |
| 20               | 1                | 0              | 4.623003                | -1.407261 | 0.466212  |
| 21               | 1                | 0              | 0.093301                | -1.743759 | -0.533088 |
| 22               | 6                | 0              | -3.004440               | -2.267171 | -0.270691 |
| 23               | 1                | 0              | -3.164094               | -2.198639 | -1.351238 |
| 24               | 1                | 0              | -2.304840               | -3.090255 | -0.088012 |
| 25               | 1                | 0              | -3.946439               | -2.474064 | 0.237633  |

### TS-cleavage of C-O bond in monoprotonated ester 1e (TS-Me)

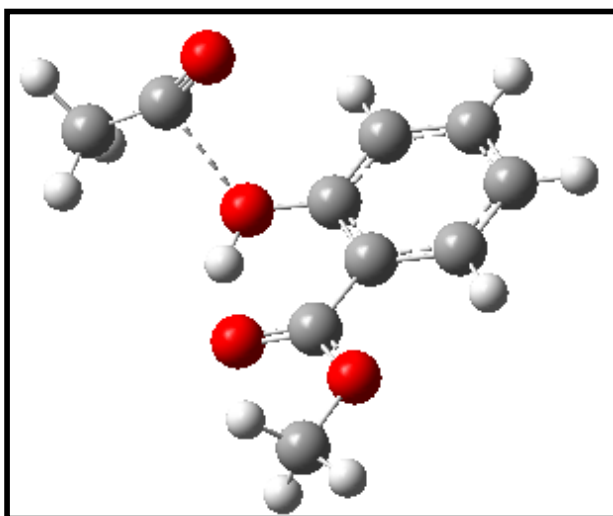

HF = -688.41991320 (B3LYP/6-31+G(d))

HF = -688.15138682 (M06/6-311++G(d,p))

HF = -688.30967320 (M06-2X/6-311++G(d,p))

HF = -686.73068812 (MP2/6-311++G(d,p))

ZPE = 0.194855 (Hartree/Particle)

Thermal correction to Gibbs Free Energy = 0.153271 (Hartree/Particle)

NIMAG = 1 (55.68i)

---

| Center<br>Number | Atomic<br>Number | Atomic<br>Type | Coordinates (Angstroms) |           |           |
|------------------|------------------|----------------|-------------------------|-----------|-----------|
|                  |                  |                | X                       | Y         | Z         |
| 1                | 6                | 0              | -2.790304               | -0.952595 | 0.539401  |
| 2                | 8                | 0              | -2.687251               | -0.236698 | 1.417940  |
| 3                | 8                | 0              | -1.225489               | -0.468485 | -0.794609 |
| 4                | 6                | 0              | -0.494105               | 0.654192  | -0.461611 |
| 5                | 6                | 0              | 0.870025                | 0.547508  | -0.106513 |
| 6                | 6                | 0              | -1.134676               | 1.892024  | -0.485609 |
| 7                | 6                | 0              | 1.573361                | 1.718913  | 0.221647  |
| 8                | 6                | 0              | -0.415549               | 3.039793  | -0.150531 |
| 9                | 1                | 0              | -2.179349               | 1.949774  | -0.774199 |
| 10               | 6                | 0              | 0.936782                | 2.956824  | 0.204596  |
| 11               | 1                | 0              | 2.622254                | 1.645185  | 0.486324  |
| 12               | 1                | 0              | -0.914517               | 4.004163  | -0.171712 |

---



|    |   |   |           |           |           |
|----|---|---|-----------|-----------|-----------|
| 13 | 1 | 0 | 1.490536  | 3.854312  | 0.461336  |
| 14 | 6 | 0 | 1.515103  | -0.781497 | -0.120272 |
| 15 | 8 | 0 | 0.919334  | -1.809920 | -0.476779 |
| 16 | 8 | 0 | 2.780424  | -0.787351 | 0.273701  |
| 17 | 6 | 0 | 3.472656  | -2.062360 | 0.272143  |
| 18 | 1 | 0 | 2.974261  | -2.755254 | 0.952628  |
| 19 | 1 | 0 | 3.492655  | -2.472098 | -0.739394 |
| 20 | 1 | 0 | 4.478917  | -1.834099 | 0.618790  |
| 21 | 1 | 0 | -0.566072 | -1.235517 | -0.796312 |
| 22 | 6 | 0 | -3.385163 | -2.005773 | -0.257312 |
| 23 | 1 | 0 | -3.596487 | -1.618658 | -1.258191 |
| 24 | 1 | 0 | -2.683506 | -2.843400 | -0.329815 |
| 25 | 1 | 0 | -4.303615 | -2.316944 | 0.252887  |

---

**After cleavage of C-O bond to generate neutral ester and acyl cation (PM-Me)**

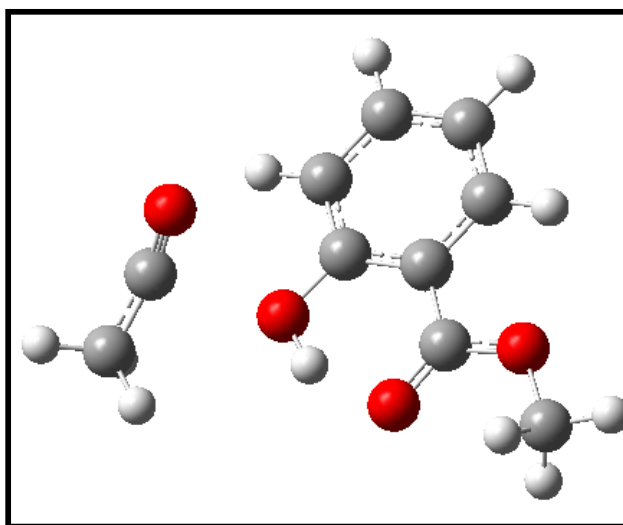

HF = -688.41991320 (B3LYP/6-31+G(d))

HF = -688.15401117 (M06/6-311++G(d,p))

HF = -688.31190150 (M06-2X/6-311++G(d,p))

HF = -686.73251818 (MP2/6-311++G(d,p))

ZPE = 0.194803 (Hartree/Particle)

Thermal correction to Gibbs Free Energy = 0.151624 (Hartree/Particle)

NIMAG = 0

| Center<br>Number | Atomic<br>Number | Atomic<br>Type | Coordinates (Angstroms) |           |           |
|------------------|------------------|----------------|-------------------------|-----------|-----------|
|                  |                  |                | X                       | Y         | Z         |
| 1                | 6                | 0              | -3.121662               | -0.889466 | 0.581608  |
| 2                | 8                | 0              | -2.931731               | -0.157314 | 1.420121  |
| 3                | 8                | 0              | -1.175063               | -0.461934 | -0.797210 |
| 4                | 6                | 0              | -0.422189               | 0.632556  | -0.468283 |
| 5                | 6                | 0              | 0.941334                | 0.513282  | -0.104993 |
| 6                | 6                | 0              | -1.037257               | 1.887911  | -0.498833 |
| 7                | 6                | 0              | 1.659638                | 1.677751  | 0.224893  |
| 8                | 6                | 0              | -0.304575               | 3.024985  | -0.164599 |
| 9                | 1                | 0              | -2.079360               | 1.961160  | -0.793901 |
| 10               | 6                | 0              | 1.045618                | 2.925135  | 0.200163  |
| 11               | 1                | 0              | 2.704922                | 1.587706  | 0.498951  |
| 12               | 1                | 0              | -0.789798               | 3.996545  | -0.192236 |
| 13               | 1                | 0              | 1.611073                | 3.815090  | 0.458028  |
| 14               | 6                | 0              | 1.572034                | -0.821012 | -0.099869 |
| 15               | 8                | 0              | 0.969438                | -1.854514 | -0.422944 |
| 16               | 8                | 0              | 2.847783                | -0.826728 | 0.277627  |
| 17               | 6                | 0              | 3.527648                | -2.105944 | 0.293769  |
| 18               | 1                | 0              | 3.034178                | -2.781722 | 0.995090  |
| 19               | 1                | 0              | 3.531263                | -2.538934 | -0.708508 |
| 20               | 1                | 0              | 4.541206                | -1.880839 | 0.621573  |
| 21               | 1                | 0              | -0.559185               | -1.248755 | -0.767431 |
| 22               | 6                | 0              | -3.609526               | -1.873672 | -0.340684 |
| 23               | 1                | 0              | -3.619522               | -1.441418 | -1.346276 |
| 24               | 1                | 0              | -2.943944               | -2.743869 | -0.310351 |
| 25               | 1                | 0              | -4.620629               | -2.150206 | -0.014728 |

### Monoprotonation of carbamate 1b (SM<sub>0</sub>-NMe<sub>2</sub>)

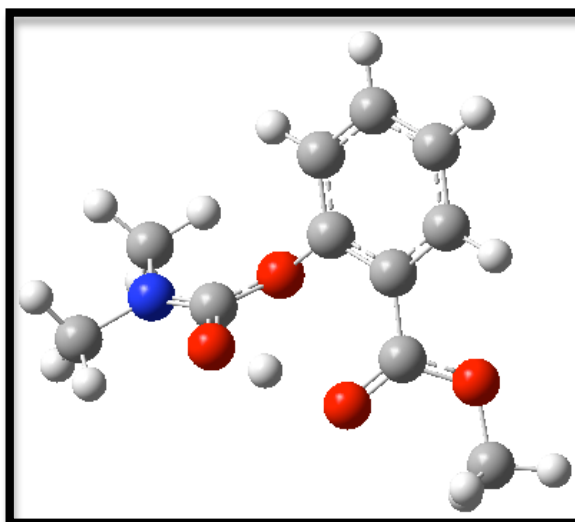

HF = -782.8123796 (M06/6-311++G(d,p))

HF = -783.0881193 (M06-2X/6-311++G(d,p))

HF = -781.1794158 (MP2/6-311++G(d,p))

ZPE = 0.243337 (Hartree/Particle)

Thermal correction to Gibbs Free Energy = 0.19918 (Hartree/Particle)

NIMAG = 0

---

| Center | Atomic | Atomic | Coordinates (Angstroms) |           |           |
|--------|--------|--------|-------------------------|-----------|-----------|
| Number | Number | Type   | X                       | Y         | Z         |
| 1      | 7      | 0      | 3.053131                | -0.341351 | 0.115094  |
| 2      | 6      | 0      | 1.777956                | -0.387476 | -0.173143 |
| 3      | 8      | 0      | 1.346663                | -1.014087 | -1.225136 |
| 4      | 8      | 0      | 0.916936                | 0.185729  | 0.672576  |
| 5      | 6      | 0      | -0.167558               | 0.972831  | 0.199595  |
| 6      | 6      | 0      | -1.443913               | 0.423061  | 0.001851  |
| 7      | 6      | 0      | 0.062588                | 2.339277  | 0.103411  |
| 8      | 6      | 0      | -2.501051               | 1.301725  | -0.292293 |
| 9      | 6      | 0      | -0.997343               | 3.191061  | -0.218160 |
| 10     | 1      | 0      | 1.056417                | 2.731114  | 0.292195  |
| 11     | 6      | 0      | -2.280061               | 2.672625  | -0.410386 |
| 12     | 1      | 0      | -3.493340               | 0.892422  | -0.446674 |
| 13     | 1      | 0      | -0.816931               | 4.258153  | -0.302692 |

---

|    |   |   |           |           |           |
|----|---|---|-----------|-----------|-----------|
| 14 | 1 | 0 | -3.107453 | 3.332621  | -0.650639 |
| 15 | 6 | 0 | -1.698878 | -1.040462 | 0.021309  |
| 16 | 8 | 0 | -0.903061 | -1.884681 | -0.409712 |
| 17 | 8 | 0 | -2.881217 | -1.364106 | 0.507741  |
| 18 | 6 | 0 | -3.257740 | -2.769233 | 0.482509  |
| 19 | 1 | 0 | -3.254925 | -3.131472 | -0.546834 |
| 20 | 1 | 0 | -2.561190 | -3.345827 | 1.093055  |
| 21 | 1 | 0 | -4.260453 | -2.794632 | 0.904217  |
| 22 | 6 | 0 | 4.036892  | -1.107785 | -0.668997 |
| 23 | 1 | 0 | 3.527950  | -1.822009 | -1.311994 |
| 24 | 1 | 0 | 4.627379  | -0.414997 | -1.274644 |
| 25 | 1 | 0 | 4.693006  | -1.633089 | 0.028365  |
| 26 | 6 | 0 | 3.596905  | 0.461230  | 1.223068  |
| 27 | 1 | 0 | 4.394493  | 1.095067  | 0.828293  |
| 28 | 1 | 0 | 2.818047  | 1.075732  | 1.666571  |
| 29 | 1 | 0 | 4.007857  | -0.214394 | 1.977907  |
| 30 | 1 | 0 | 0.395880  | -1.363202 | -1.039118 |

-----

**Monoprotonation of carbamate 1b (SM-NMe<sub>2</sub>)**

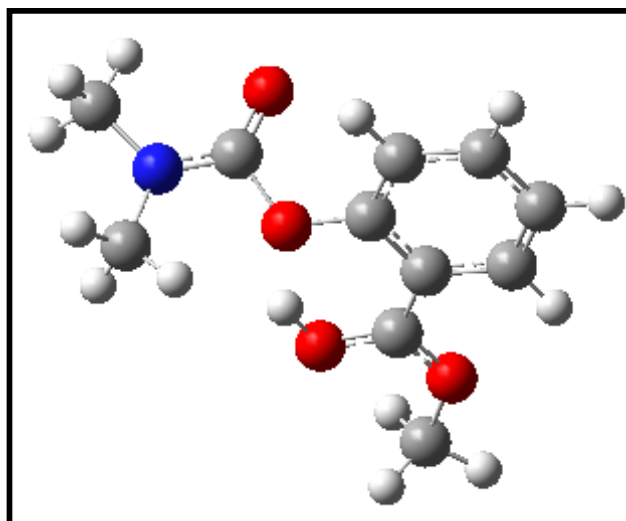

HF = -728.8751510 (B3LYP/6-31+G(d))

HF = -782.8054535 (M06/6-311++G(d,p))

HF = -783.0764360 (M06-2X/6-311++G(d,p))

HF = -781.1681371 (MP2/6-311++G(d,p))

ZPE = 0.243816 (Hartree/Particle)

Thermal correction to Gibbs Free Energy = 0.198917 (Hartree/Particle)

NIMAG = 0

---

| Center | Atomic | Atomic | Coordinates (Angstroms) |           |           |
|--------|--------|--------|-------------------------|-----------|-----------|
| Number | Number | Type   | X                       | Y         | Z         |
| 1      | 7      | 0      | -3.071997               | -0.504288 | 0.122317  |
| 2      | 6      | 0      | -2.042734               | 0.140518  | -0.439202 |
| 3      | 8      | 0      | -2.021995               | 0.798465  | -1.463658 |
| 4      | 8      | 0      | -0.845887               | -0.061765 | 0.316455  |
| 5      | 6      | 0      | 0.177284                | 0.863672  | 0.209433  |
| 6      | 6      | 0      | 1.501640                | 0.380380  | 0.073049  |
| 7      | 6      | 0      | -0.069456               | 2.228658  | 0.307750  |
| 8      | 6      | 0      | 2.568198                | 1.307280  | 0.033441  |
| 9      | 6      | 0      | 0.999621                | 3.123545  | 0.260163  |
| 10     | 1      | 0      | -1.085823               | 2.586527  | 0.422715  |
| 11     | 6      | 0      | 2.318275                | 2.667523  | 0.121888  |
| 12     | 1      | 0      | 3.582905                | 0.939152  | -0.062731 |
| 13     | 1      | 0      | 0.799927                | 4.187803  | 0.339835  |
| 14     | 1      | 0      | 3.141294                | 3.373478  | 0.090975  |
| 15     | 6      | 0      | 1.794090                | -1.036815 | -0.020147 |
| 16     | 8      | 0      | 0.898371                | -1.970118 | 0.066246  |
| 17     | 8      | 0      | 3.016030                | -1.400882 | -0.197654 |
| 18     | 6      | 0      | 3.357886                | -2.825521 | -0.281857 |
| 19     | 1      | 0      | 3.074048                | -3.314148 | 0.650135  |
| 20     | 1      | 0      | 2.841489                | -3.264775 | -1.135201 |
| 21     | 1      | 0      | 4.435405                | -2.829779 | -0.422693 |
| 22     | 6      | 0      | -4.345579               | -0.566634 | -0.599903 |
| 23     | 1      | 0      | -4.231768               | -0.117114 | -1.584913 |
| 24     | 1      | 0      | -4.648165               | -1.613348 | -0.707280 |
| 25     | 1      | 0      | -5.116590               | -0.028019 | -0.038731 |
| 26     | 6      | 0      | -3.023557               | -1.212991 | 1.405840  |
| 27     | 1      | 0      | -2.190929               | -0.859670 | 2.010528  |
| 28     | 1      | 0      | -3.957241               | -1.016498 | 1.939933  |

---

|    |   |   |           |           |          |
|----|---|---|-----------|-----------|----------|
| 29 | 1 | 0 | -2.929186 | -2.293028 | 1.243965 |
| 30 | 1 | 0 | 0.002443  | -1.563848 | 0.203401 |

---

**TS-cleavage of C-O bond in monoprottonated carbamate 1b (TS-NMe<sub>2</sub>)**

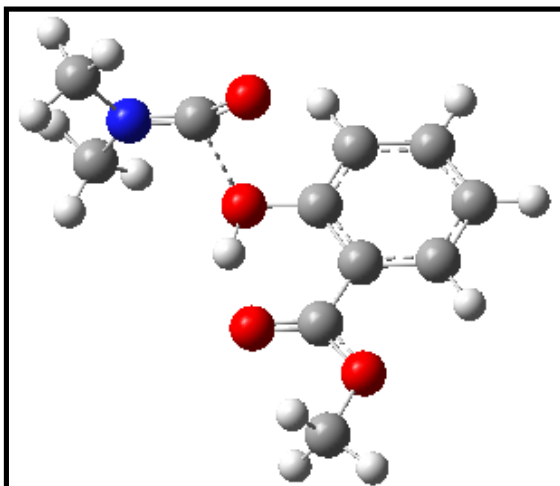

HF = -728.8522390 (B3LYP/6-31+G(d))

HF = -782.7813691 (M06/6-311++G(d,p))

HF = -783.0466561 (M06-2X/6-311++G(d,p))

HF = -781.1502918 (MP2/6-311++G(d,p))

ZPE = 0.241249 (Hartree/Particle)

Thermal correction to Gibbs Free Energy = 0.194782 (Hartree/Particle)

NIMAG = 1 (97.95i)

---

| Center<br>Number | Atomic<br>Number | Atomic<br>Type | Coordinates (Angstroms) |           |           |
|------------------|------------------|----------------|-------------------------|-----------|-----------|
|                  |                  |                | X                       | Y         | Z         |
| 1                | 7                | 0              | -3.270849               | -0.341600 | 0.021344  |
| 2                | 6                | 0              | -2.309698               | 0.223678  | 0.647888  |
| 3                | 8                | 0              | -1.795721               | 0.743375  | 1.550696  |
| 4                | 8                | 0              | -0.707362               | 0.117854  | -0.794229 |
| 5                | 6                | 0              | 0.379216                | 0.895764  | -0.458031 |
| 6                | 6                | 0              | 1.611724                | 0.302169  | -0.100955 |
| 7                | 6                | 0              | 0.233545                | 2.282458  | -0.484761 |
| 8                | 6                | 0              | 2.693934                | 1.139099  | 0.222542  |

---

|    |   |   |           |           |           |
|----|---|---|-----------|-----------|-----------|
| 9  | 6 | 0 | 1.321123  | 3.090971  | -0.155430 |
| 10 | 1 | 0 | -0.721337 | 2.714267  | -0.767479 |
| 11 | 6 | 0 | 2.552084  | 2.523309  | 0.199353  |
| 12 | 1 | 0 | 3.644003  | 0.689491  | 0.488834  |
| 13 | 1 | 0 | 1.206823  | 4.170751  | -0.178812 |
| 14 | 1 | 0 | 3.394731  | 3.158977  | 0.452317  |
| 15 | 6 | 0 | 1.729089  | -1.170343 | -0.101562 |
| 16 | 8 | 0 | 0.799130  | -1.916759 | -0.443304 |
| 17 | 8 | 0 | 2.909281  | -1.631736 | 0.289903  |
| 18 | 6 | 0 | 3.089645  | -3.070917 | 0.303742  |
| 19 | 1 | 0 | 2.378763  | -3.527228 | 0.995242  |
| 20 | 1 | 0 | 2.951134  | -3.472282 | -0.701903 |
| 21 | 1 | 0 | 4.112682  | -3.220920 | 0.644058  |
| 22 | 6 | 0 | -4.466830 | -0.704139 | 0.850177  |
| 23 | 1 | 0 | -4.271201 | -0.488899 | 1.899728  |
| 24 | 1 | 0 | -5.313123 | -0.115350 | 0.492560  |
| 25 | 1 | 0 | -4.647022 | -1.771505 | 0.712312  |
| 26 | 1 | 0 | -0.381289 | -0.836768 | -0.775868 |
| 27 | 6 | 0 | -3.334376 | -0.692584 | -1.419066 |
| 28 | 1 | 0 | -2.609200 | -0.108882 | -1.976317 |
| 29 | 1 | 0 | -3.143312 | -1.762332 | -1.527986 |
| 30 | 1 | 0 | -4.345078 | -0.456783 | -1.754010 |

---

After cleavage of C-O bond to generate neutral ester and dimethyl isocyanate cation (PM-NMe<sub>2</sub>)

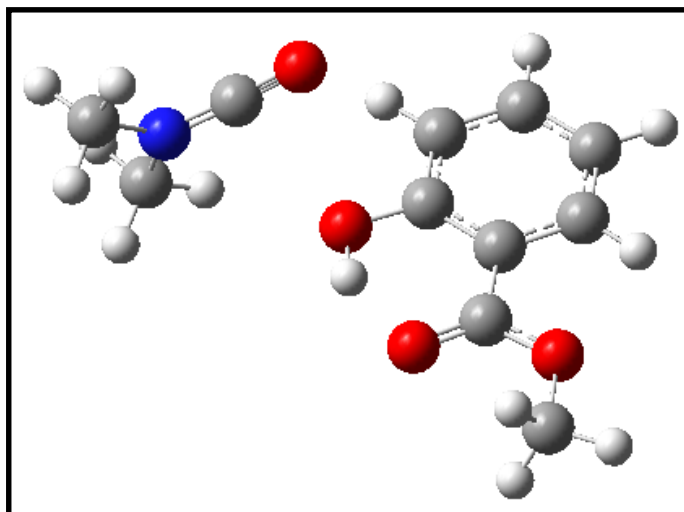

HF = -728.8552990 (B3LYP/6-31+G(d))

HF = -782.7848639 (M06/6-311++G(d,p))

HF = -783.0503338 (M06-2X/6-311++G(d,p))

HF = -781.1525106 (MP2/6-311++G(d,p))

ZPE = 0.240859 (Hartree/Particle)

Thermal correction to Gibbs Free Energy = 0.19023 (Hartree/Particle)

NIMAG = 0

---

| Center Number | Atomic Number | Atomic Type | Coordinates (Angstroms) |           |           |
|---------------|---------------|-------------|-------------------------|-----------|-----------|
|               |               |             | X                       | Y         | Z         |
| 1             | 7             | 0           | -3.728302               | -0.363728 | 0.041683  |
| 2             | 6             | 0           | -2.909642               | 0.167936  | 0.839750  |
| 3             | 8             | 0           | -2.212517               | 0.643406  | 1.619709  |
| 4             | 8             | 0           | -0.512314               | 0.051379  | -0.813888 |
| 5             | 6             | 0           | 0.533128                | 0.841073  | -0.451031 |
| 6             | 6             | 0           | 1.796322                | 0.306718  | -0.092344 |
| 7             | 6             | 0           | 0.331406                | 2.227871  | -0.437761 |
| 8             | 6             | 0           | 2.831618                | 1.190806  | 0.272937  |
| 9             | 6             | 0           | 1.370164                | 3.078466  | -0.072136 |
| 10            | 1             | 0           | -0.641938               | 2.618173  | -0.719576 |

---



|    |   |   |           |           |           |
|----|---|---|-----------|-----------|-----------|
| 11 | 6 | 0 | 2.626754  | 2.564610  | 0.286152  |
| 12 | 1 | 0 | 3.797404  | 0.779422  | 0.545059  |
| 13 | 1 | 0 | 1.201300  | 4.151868  | -0.066480 |
| 14 | 1 | 0 | 3.433032  | 3.233906  | 0.569774  |
| 15 | 6 | 0 | 1.994972  | -1.153836 | -0.116959 |
| 16 | 8 | 0 | 1.111199  | -1.956330 | -0.446830 |
| 17 | 8 | 0 | 3.216175  | -1.549692 | 0.246898  |
| 18 | 6 | 0 | 3.477601  | -2.973201 | 0.240933  |
| 19 | 1 | 0 | 2.808301  | -3.480125 | 0.939212  |
| 20 | 1 | 0 | 3.344260  | -3.374668 | -0.765769 |
| 21 | 1 | 0 | 4.513976  | -3.070275 | 0.560877  |
| 22 | 6 | 0 | -4.873473 | -1.159025 | 0.596887  |
| 23 | 1 | 0 | -4.795943 | -1.205556 | 1.682490  |
| 24 | 1 | 0 | -5.793975 | -0.655171 | 0.299692  |
| 25 | 1 | 0 | -4.810354 | -2.158785 | 0.166646  |
| 26 | 1 | 0 | -0.193318 | -0.888280 | -0.788111 |
| 27 | 6 | 0 | -3.634257 | -0.173887 | -1.440424 |
| 28 | 1 | 0 | -2.712758 | 0.352926  | -1.676770 |
| 29 | 1 | 0 | -3.629152 | -1.167969 | -1.889145 |
| 30 | 1 | 0 | -4.510630 | 0.395340  | -1.752815 |

---

#### IV. Synthesis of Chemical Compounds and Acid-catalyzed Reactions

##### Preparation of Substrates

##### Preparation of tetramethyl 4,4'-(carbonylbis(oxy))diisophthalate SI-1

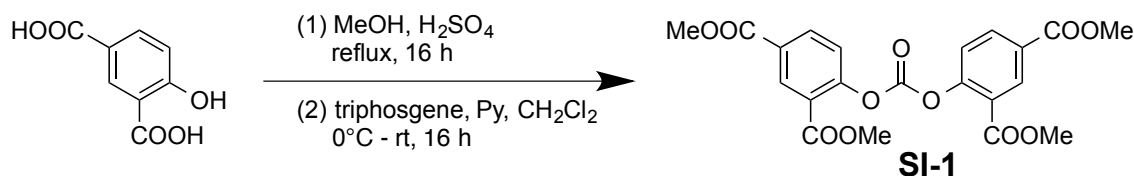

To a solution of 4-hydroxyisophthalic acid (2000.1 mg, 11.0 mmol) in MeOH (40 mL), added conc. H<sub>2</sub>SO<sub>4</sub> (10 mL) at room temperature, the whole was stirred for 16 hours at reflux. After the reaction completed, poured into ice-water and quenched with 2M aqueous solution of NaOH (30 mL). Then, The mixture was extracted with CH<sub>2</sub>Cl<sub>2</sub> (30 mL x 3). The organic phase was washed with brine (30 mL), dried over Na<sub>2</sub>SO<sub>4</sub>, and the solvent was evaporated under reduced pressure to give a crude (2240.1 mg). This crude in CH<sub>2</sub>Cl<sub>2</sub> (30 mL) was added to a solution of triphosgene (810.1 mg, 2.72 mmol) in CH<sub>2</sub>Cl<sub>2</sub> (10 mL), then pyridine (4.0 mL) was added at 0°C. The whole was warmed up from 0°C to room temperature, and stirred for 16 hours. After the reaction completed, the reaction was quenched with 2M aqueous solution of HCl (30 mL). This reaction mixture was extracted with CH<sub>2</sub>Cl<sub>2</sub> (30 mL x 4). The organic phase was washed with brine (40 mL), dried over Na<sub>2</sub>SO<sub>4</sub>, and the solvent was evaporated under reduced pressure to give a residue, which was column-chromatography on silica gel (eluent: EtOAc / n-Hexane = 2 / 3) to afford tetramethyl 4,4'-(carbonylbis(oxy))diisophthalate **SI-1** (1819.4 mg, 3.99 mmol, 74%) as a colorless solid. Mp. 176.9-177.6°C (colorless plates, recrystallized from CH<sub>2</sub>Cl<sub>2</sub>/n-Hexane). <sup>1</sup>H-NMR (CDCl<sub>3</sub>, 400 MHz (ppm): δ (ppm): 8.700 (1H, d, *J* = 2.4 Hz), 8.275 (1H, dd, *J* = 8.4, 2.4 Hz), 7.484 (1H, d, *J* = 8.4 Hz), 3.970 (3H, s), 3.948 (3H, s). <sup>13</sup>C-NMR (CDCl<sub>3</sub>, 100 MHz) δ (ppm): 165.85, 164.49, 154.31, 150.93, 135.70, 134.00, 129.43, 124.47, 123.84, 53.20, 53.11. HRMS (ESI-TOF, [M+Na]<sup>+</sup>): Calcd. for C<sub>21</sub>H<sub>18</sub>NaO<sub>11</sub><sup>+</sup>: 469.0741. Found: 469.0728. Anal. Calcd. for C<sub>21</sub>H<sub>18</sub>O<sub>11</sub>: C, 56.51; H, 4.06. Found: C, 56.20; H, 4.11.

##### Preparation of dimethyl 2,2'-(carbonylbis(oxy))dibenzoate SI-2

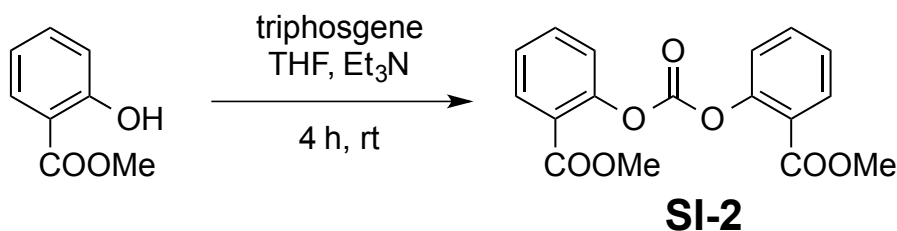

To a solution of methyl 2-hydroxybenzoate (1019.5 mg, 66.7 mmol) and  $\text{NEt}_3$  (15.0 mL, 107 mmol) in THF (30 mL) was added a solution of triphosgene (3000.1 mg, 10.1 mmol) in  $\text{CH}_2\text{Cl}_2$  (25 mL) at  $0^\circ\text{C}$ . The whole was stirred at  $0^\circ\text{C}$ , for 20 min and then stirring was continued at room temperature for an additional 4 hours. The reaction was quenched with saturated aqueous solution of  $\text{NaHCO}_3$  (30 mL). The whole was extracted with  $\text{CH}_2\text{Cl}_2$  (20 mL x 5) and the organic phase was washed with brine (20 mL), dried over  $\text{Na}_2\text{SO}_4$ , and the solvent was evaporated to give a residue, which was recrystallized from  $\text{CHCl}_3$  and n-Hexane to afford dimethyl 2,2'-(carbonylbis(oxy))dibenzoate **SI-2** (8863.4 mg, 26.9 mmol, 81%) as a colorless solid.

Mp.  $109.5\text{--}110.2^\circ\text{C}$  (colorless plates, recrystallized from  $\text{CHCl}_3/\text{n-Hexane}$ ).  $^1\text{H-NMR}$  (400 MHz,  $\text{CDCl}_3$ )  $\delta$  (ppm): 8.033 (1H, dd,  $J = 8.0, 1.6$  Hz), 7.605 (1H, ddd,  $J = 10.0, 7.0, 2.0$  Hz), 7.398–7.261 (2H, m), 3.945 (3H, s).  $^{13}\text{C-NMR}$  (100 MHz,  $\text{CDCl}_3$ )  $\delta$  (ppm): 165.36, 151.58, 151.23, 134.59, 132.38, 127.14, 124.06, 123.65, 52.93. HRMS (ESI-TOF,  $[\text{M}+\text{Na}]^+$ ): Calcd. for  $\text{C}_{17}\text{H}_{14}\text{NaO}_7^+$ : 353.0632. Found: 353.0632. Anal. Calcd. for  $\text{C}_{17}\text{H}_{14}\text{O}_7$ : C, 61.82; H, 4.27. Found: C, 61.64; H, 4.50.

#### Preparation of dimethyl 4,4'-(carbonylbis(oxy))dibenzoate **SI-3**

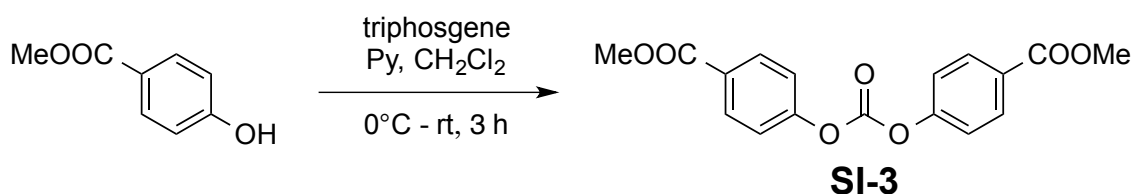

Methyl 4-hydroxybenzoate (1791.1 mg, 11.8 mmol) in  $\text{CH}_2\text{Cl}_2$  (30 mL) was added to a solution of triphosgene (940.5 mg, 3.17 mmol) in  $\text{CH}_2\text{Cl}_2$  (30 mL), then pyridine (5.0 mL) was added at  $0^\circ\text{C}$ . The whole was warmed up from  $0^\circ\text{C}$  to room temperature, and stirred for 16 hours. After the reaction completed, the reaction was quenched with 2M aqueous solution of  $\text{HCl}$  (40 mL). This reaction mixture was extracted with  $\text{CH}_2\text{Cl}_2$  (40 mL x 3). The organic phase was washed with brine (40 mL), dried over  $\text{Na}_2\text{SO}_4$ , and the solvent was evaporated under reduced pressure to give a residue, which was column-chromatography on silica gel (eluent :  $\text{EtOAc} / \text{n-Hexane} = 1 / 2$ ) to afford dimethyl 4,4'-(carbonylbis(oxy))dibenzoate **SI-3** (2983.1 mg, 9.03 mmol, 90%) as a colorless solid. Mp.  $189.1\text{--}190.1^\circ\text{C}$  (colorless needles, recrystallized from  $\text{CHCl}_3/\text{n-Hexane}$ ).

$^1\text{H-NMR}$  ( $\text{CDCl}_3$ , 400 MHz)  $\delta$  (ppm): 8.113 (4H, d,  $J = 8.0$  Hz), 7.361 (4H, d,  $J = 7.6$  Hz), 3.922 (6H, s).  $^{13}\text{C-NMR}$  ( $\text{CDCl}_3$ , 100 MHz)  $\delta$  (ppm): 166.58, 154.70, 151.39, 131.93, 128.95, 121.35, 52.83. HRMS (ESI-TOF,  $[\text{M}+\text{Na}]^+$ ): Calcd. for  $\text{C}_{17}\text{H}_{14}\text{NaO}_7^+$ :

353.0632. Found: 353.0656. Anal. Calcd. for  $C_{17}H_{14}O_7$ : C, 61.82; H, 4.27. Found: C, 61.66; H, 4.40.

#### Preparation of methyl 4-((dimethylcarbamoyl)oxy)benzoate **1a**

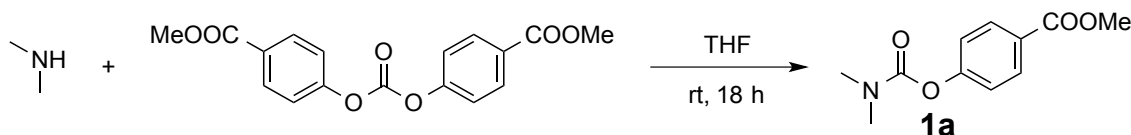

To a solution of dimethyl 4,4'-(carbonylbis(oxy))dibenzoate **SI-3** (696.4 mg, 2.11 mmol) in THF (2.0 mL), 50%(w/w) aqueous solution of dimethyl amine (194.5 mg, 2.16 mmol) in THF (3.0 mL) was added at room temperature. After the reaction completed, added 2M aqueous solution of NaOH (40 mL), then extracted with  $CH_2Cl_2$  (40 mL x 3). The organic phase was washed with brine (40 mL), dried over  $Na_2SO_4$ , and the solvent was evaporated under reduced pressure to give a residue, which was flash column-chromatographed on silica-gel (eluent: EtOAc / n-Hexane = 1 / 2) to afford methyl 4-((dimethylcarbamoyl)oxy)benzoate **1a** (400.4 mg, 1.79 mmol, 85%) as a colorless solid. Mp. 97.1-97.3°C (colorless needles, recrystallized from  $CH_2Cl_2$ /n-Hexane).  $^1H$ -NMR ( $CDCl_3$ , 400 MHz)  $\delta$  (ppm): 8.061 (2H, dt,  $J = 9.2, 2.8$  Hz), 7.211 (2H, dt,  $J = 9.2, 2.8$  Hz), 3.920 (3H, s), 3.123 (3H, s), 3.036 (3H, s).  $^{13}C$ -NMR ( $CDCl_3$ , 100 MHz)  $\delta$  (ppm): 167.01, 155.79, 154.64, 131.53, 127.48, 122.08, 52.62, 37.27, 37.03. HRMS (ESI-TOF,  $[M+Na]^+$ ): Calcd. for  $C_{11}H_{13}NNaO_4^+$ : 246.0737. Found: 246.0751. Anal. Calcd. for  $C_{11}H_{13}NO_4$ : C, 59.19; H, 5.87; N, 6.27. Found: C, 59.15; H, 6.03; N, 6.24.

#### Preparation of methyl 2-((dimethylcarbamoyl)oxy)benzoate **1b**

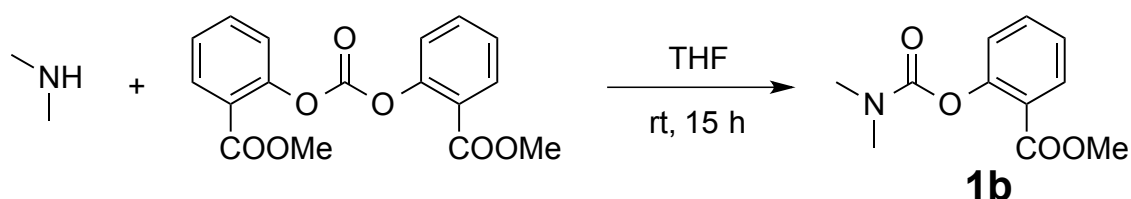

To a solution of dimethyl 2,2'-(carbonylbis(oxy))dibenzoate **SI-2** (1413.7 mg, 4.28 mmol) in THF (5.0 mL), 50%(w/w) aqueous solution of dimethyl amine (411.9 mg, 4.57 mmol) in THF (5.0 mL) was added at room temperature. The whole reaction mixture was stirred for 15 hours at room temperature. The reaction mixture was column-chromatographed on silica-gel (eluent: EtOAc / n-Hexane = 1 / 2) to afford methyl 2-((dimethylcarbamoyl)oxy)benzoate **1b** (870.2 mg, 3.90 mmol, 91%) as a colorless oil.  $^1H$ -NMR ( $CDCl_3$ , 400 MHz)  $\delta$  (ppm): 7.961 (1H, dd,  $J = 7.8, 1.6$  Hz), 7.506 (1H, td,  $J = 7.8, 1.6$  Hz), 7.242 (1H, td,  $J = 7.6, 1.2$  Hz), 7.145 (1H, dd,  $J = 8.2,$

1.2 Hz), 3.830 (3H, s), 3.115 (3H, s), 2.996 (3H, s).  $^{13}\text{C-NMR}$  ( $\text{CDCl}_3$ , 100 MHz)  $\delta$  (ppm): 165.46, 154.92, 151.64, 133.81, 131.71, 125.60, 124.42, 123.90, 52.22, 36.93, 36.73. HRMS (ESI-TOF,  $[\text{M}+\text{Na}]^+$ ): Calcd. for  $\text{C}_{11}\text{H}_{13}\text{NNaO}_4^+$ : 246.07368. Found: 246.07369. Anal. Calcd. for  $\text{C}_{11}\text{H}_{13}\text{NO}_4+0.02\text{CH}_2\text{Cl}_2$ : C, 58.85; H, 5.84; N, 6.23. Found: C, 58.62; H, 5.79; N, 6.12.

#### Preparation of dimethyl 4-((dimethylcarbamoyl)oxy)isophthalate **1f**

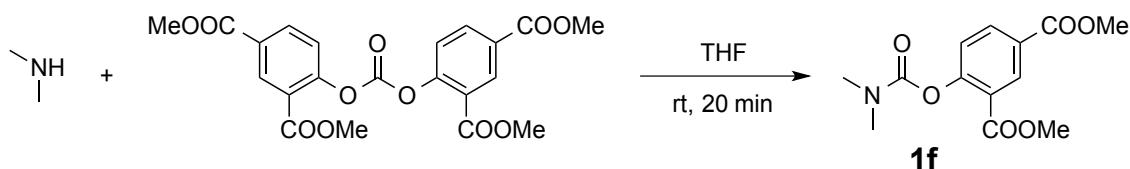

To a solution of tetramethyl 4,4'-(carbonylbis(oxy))diisophthalate **SI-1** (1511.9 mg, 3.39 mmol) in  $\text{CH}_2\text{Cl}_2$  (5.0 mL), 50%(w/w) aqueous solution of dimethyl amine (307.1 mg, 3.41 mmol) in  $\text{CH}_2\text{Cl}_2$  (10.0 mL) was added at room temperature. The whole mixture was stirred for 10 minutes at room temperature. The reaction mixture was purified by column-chromatography on silica gel (eluent : EtOAc / n-Hexane = 1 / 1) to afford dimethyl 4-((dimethylcarbamoyl)oxy)isophthalate **1f** (737.1 mg, 2.62 mmol, 77%) as a colorless solid. Mp. 90.6-91.2°C (colorless needles, recrystallized from  $\text{CH}_2\text{Cl}_2/\text{n-Hexane}$ ).  $^1\text{H-NMR}$  ( $\text{CDCl}_3$ , 400 MHz)  $\delta$  (ppm): 8.635 (1H, d,  $J = 2.0$  Hz), 8.189 (1H, dd,  $J = 8.6, 2.0$  Hz), 7.242 (1H, d,  $J = 8.8$  Hz), 3.926 (3H, s), 3.883 (3H, s), 3.148 (3H, s), 3.024 (3H, s).  $^{13}\text{C-NMR}$  ( $\text{CDCl}_3$ , 100 MHz)  $\delta$  (ppm): 166.19, 165.01, 155.41, 154.53, 135.08, 133.67, 127.88, 124.93, 124.36, 52.89, 52.79, 37.33, 37.13. HRMS (ESI-TOF,  $[\text{M}+\text{Na}]^+$ ): Calcd. for  $\text{C}_{13}\text{H}_{15}\text{NNaO}_6^+$ : 304.0792. Found: 304.0794. Anal. Calcd. for  $\text{C}_{13}\text{H}_{15}\text{NO}_6$ : C, 55.51; H, 5.38; N, 4.98. Found: C, 55.38; H, 5.32; N, 5.01.

#### Preparation of dimethyl 4-((diphenylcarbamoyl)oxy)isophthalate **4**

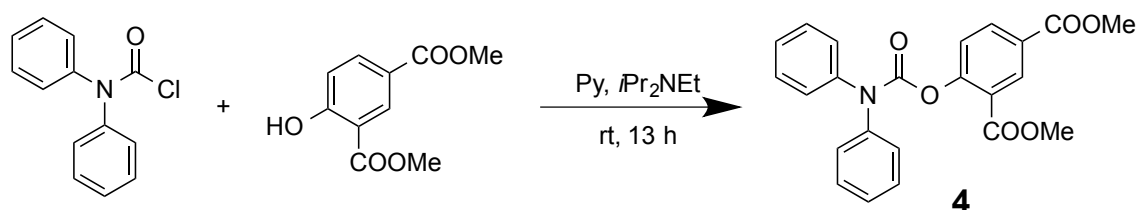

To a solution of dimethyl 4-hydroxyisophthalate (698.2 mg, 3.32 mmol) in  $i\text{Pr}_2\text{NEt}$  (0.65 mL), diphenylcarbamic chloride (717.8 mg, 3.10 mmol) was added at room temperature. The whole mixture was stirred for 13 hours at room temperature. After the reaction completed, added 2M aqueous solution of HCl (40 mL). then extracted with  $\text{CH}_2\text{Cl}_2$  (40 mL x 3). The organic phase was washed with brine (40 mL), dried over  $\text{Na}_2\text{SO}_4$ , and the solvent was evaporated under reduced pressure to give a residue, which

was flash column-chromatographed on silica-gel (eluent: EtOAc / n-Hexane = 1 / 2) to afford dimethyl 4-((diphenylcarbamoyl)oxy)isophthalate **4** (1223.8 mg, 3.02 mmol, 97%) as a colorless solid. Mp. 158.9-159.7°C (colorless needles, recrystallized from CH<sub>2</sub>Cl<sub>2</sub>/n-Hexane). <sup>1</sup>H-NMR (CDCl<sub>3</sub>, 400 MHz) δ (ppm): 8.649 (1H, d, *J* = 2.0 Hz), 8.173 (1H, dd, *J* = 8.4, 2.0 Hz), 7.448-7.352 (8H, m), 7.265-7.197 (3H, m), 3.933 (3H, s), 3.920 (3H, s). <sup>13</sup>C-NMR (CDCl<sub>3</sub>, 100 MHz) δ (ppm): 166.10, 164.86, 154.82, 152.75, 142.75, 135.13, 133.67, 129.60, 128.27, 127.23 (br), 124.67, 124.56, 52.98, 52.92. HRMS (ESI-TOF, [M+Na]<sup>+</sup>): Calcd. for C<sub>23</sub>H<sub>19</sub>NNaO<sub>6</sub><sup>+</sup>: 428.1105. Found: 428.1105. Anal. Calcd. for C<sub>23</sub>H<sub>19</sub>NO<sub>6</sub>: C, 68.14; H, 4.72; N, 3.46. Found: C, 67.79; H, 4.90; N, 3.32.

**Preparation of methyl 4-(((2-(2,5-dimethylphenyl)-2-phenylethyl)- carbamoyl)oxy) benzoate **5****

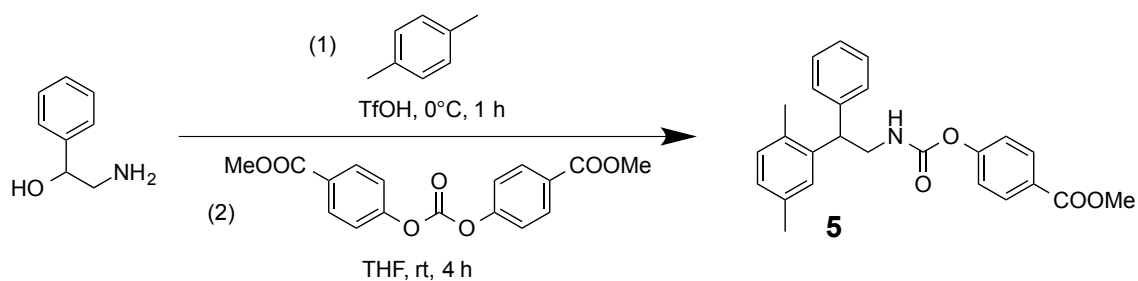

To a solution of *para*-xylene (5 mL) in TfOH (10 mL), 2-amino-1-phenylethanol (1011.2 mg, 7.37 mmol) was added at 0°C. The whole was warmed up from 0°C to 20°C, and stirred for 2 hours. After the reaction completed, the whole was poured into ice-water and added 2M aqueous solution of NaOH (50 mL). This reaction mixture was extracted with CH<sub>2</sub>Cl<sub>2</sub> (30 mL x 4). The organic phase was washed with brine (30 mL), dried over Na<sub>2</sub>SO<sub>4</sub>, and the solvent was evaporated under reduced pressure to give a yellow crude (1784.3 mg). Then this crude was added to the solution of dimethyl 4,4'-(carbonylbis(oxy))dibenzoate **SI-3** (2109.0 mg, 6.39 mmol) in THF (20 mL) at rt. The whole was stirred for 4 hours at room temperature. After the reaction completed, added 2M aqueous solution of NaOH (40 mL). then extracted with CH<sub>2</sub>Cl<sub>2</sub> (30 mL x 4). The organic phase was washed with brine (30 mL), dried over Na<sub>2</sub>SO<sub>4</sub>, and the solvent was evaporated under reduced pressure to give a residue, which was column-chromatographed on silica-gel (eluent: EtOAc / n-Hexane= 2 / 3) to afford methyl 4-(((2-(2,5-dimethylphenyl)- 2-phenylethyl)carbamoyl)oxy)benzoate **5** (222.0 mg, 4.99 mmol, 68% in two steps) as a colorless amorphous material. <sup>1</sup>H-NMR (CDCl<sub>3</sub>, 400 MHz) δ (ppm): 8.011 (2H, d, *J* = 8.4 Hz), 7.297 (2H, t, *J* = 7.6 Hz), 7.230-7.194 (3H, m), 7.135 (2H, td, *J* = 8.8, 2.0 Hz), 7.080-7.047 (2H, m), 6.990-6.971 (1H, m), 5.190-4.866 (1H, m), 4.419 (1H, t, *J* = 8.0 Hz), 3.878 (5H, m), 2.333 (3H, s), 2.229 (3H,

s.)  $^{13}\text{C}$ -NMR ( $\text{CDCl}_3$ , 100 MHz)  $\delta$  (ppm): 166.92, 155.23, 154.20, 141.77, 139.50, 136.17, 134.34, 131.55, 131.45, 129.23, 128.79, 128.08, 127.54, 127.31, 121.77, 52.60, 47.24, 46.00, 21.78, 19.80. HRMS (ESI-TOF,  $[\text{M}+\text{Na}]^+$ ): Calcd. for  $\text{C}_{25}\text{H}_{25}\text{NNaO}_4^+$ : 426.1676. Found: 426.1652. Anal. Calcd. for  $\text{C}_{25}\text{H}_{25}\text{NO}_4+0.2\text{H}_2\text{O}$ : C, 73.76; H, 6.29; N, 3.44. Found: C, 73.46; H, 6.02; N, 3.25.

### Preparation of 1-(2,4-bis(methoxycarbonyl)phenyl)-4-ethyl-piperazine-1,4-dicarboxylate **8**

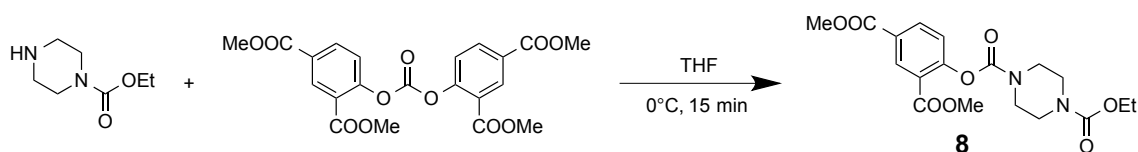

To a solution of tetramethyl 4,4'-(carbonylbis(oxy))diisophthalate **SI-1** (1349.5 mg, 3.02 mmol) in THF (10.0 mL), ethyl piperazine-1-carboxylate (490.1 mg, 3.10 mmol) in THF (5.0 mL) was added at  $0^\circ\text{C}$ . The whole mixture was stirred for 15 minutes at  $0^\circ\text{C}$ . The reaction mixture was purified by column-chromatography on silica gel (eluent : EtOAc / n-Hexane = 1 / 1) to afford 1-(2,4-bis(methoxycarbonyl)phenyl) 4-ethyl piperazine-1,4-dicarboxylate **8** (1147.7 mg, 2.91 mmol, 96%) as a colorless oil.  $^1\text{H}$ -NMR ( $\text{CDCl}_3$ , 400 MHz)  $\delta$  (ppm): 8.603 (1H, d,  $J = 2.4$  Hz), 8.160 (1H, dd,  $J = 8.4$ , 2.4 Hz), 7.203 (1H, d,  $J = 8.4$  Hz), 4.138 (2H, q,  $J = 7.2$  Hz), 3.888 (3H, s), 3.834 (3H, s), 3.664-3.528 (8H, m), 1.244 (3H, t,  $J = 7.2$  Hz).  $^{13}\text{C}$ -NMR ( $\text{CDCl}_3$ , 100 MHz)  $\delta$  (ppm): 166.00, 164.59, 155.88, 155.07, 153.28, 135.11, 133.62, 128.09, 124.77, 124.07, 62.13, 52.84, 52.76, 45.17, 44.40, 43.83, 15.10. HRMS (ESI-TOF,  $[\text{M}+\text{Na}]^+$ ): Calcd. for  $\text{C}_{18}\text{H}_{22}\text{N}_2\text{NaO}_8^+$ : 417.1268. Found: 417.1277. Anal. Calcd. for  $\text{C}_{18}\text{H}_{22}\text{N}_2\text{O}_8+0.6 \text{H}_2\text{O}$ : C, 53.36; H, 5.77; N, 6.91. Found: C, 53.11; H, 5.53; N, 6.78.

### Preparation of dimethyl 4-(((1-cyclohexylethyl)carbamoyl)oxy)isophthalate **11**

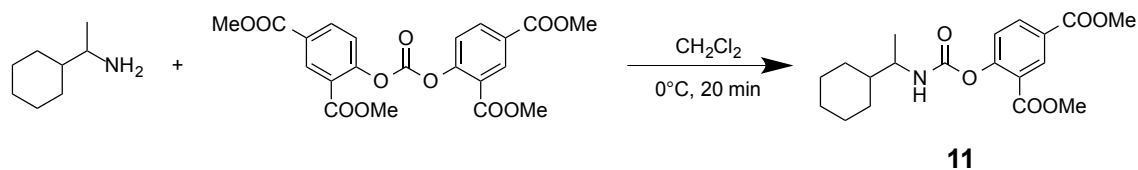

To a solution of tetramethyl 4,4'-(carbonylbis(oxy))diisophthalate **SI-1** (2234.9 mg, 5.01 mmol) in  $\text{CH}_2\text{Cl}_2$  (5.0 mL), 1-cyclohexylethan-1-amine (647.6 mg, 5.09 mmol) in  $\text{CH}_2\text{Cl}_2$  (5.0 mL) was added at  $0^\circ\text{C}$ . The whole mixture was stirred for 20 minutes at  $0^\circ\text{C}$ . The reaction mixture was purified by column-chromatography on silica gel (eluent: EtOAc / n-Hexane = 1 / 3) to afford dimethyl 4-(((1-cyclohexylethyl)carbamoyl)-oxy)isophthalate **11** (1787.2 mg, 4.92 mmol, 98%) as a colorless solid. Mp.  $105.1$ - $105.9^\circ\text{C}$  (colorless powder, recrystallized from

CH<sub>2</sub>Cl<sub>2</sub>/n-Hexane). <sup>1</sup>H-NMR (CDCl<sub>3</sub>, 400 MHz) δ (ppm) (presence of two amide conformers): 8.633-8.601 (1H, m), 8.177 (1H, dd, *J* = 8.4, 2.0 Hz), 7.237 (1H, d, *J* = 8.4 Hz), 5.071 (0.91H, d, *J* = 8.8 Hz), 4.707 (0.10H, d, *J* = 8.4 Hz), 3.925 (3H, s), 3.885 (3H, s), 3.647-3.559 (1H, m), 1.854-0.965 (14H, m). <sup>13</sup>C-NMR (CDCl<sub>3</sub>, 100 MHz) δ (ppm): 166.23, 165.28, 154.63, 153.72, 134.99, 133.59, 127.95, 124.91, 124.88, 52.92, 52.90, 52.64, 43.67, 29.51, 29.44, 26.95, 26.72, 18.62. HRMS (ESI-TOF, [M+Na]<sup>+</sup>): Calcd. for C<sub>19</sub>H<sub>25</sub>NNaO<sub>6</sub><sup>+</sup>: 386.1574. Found: 386.1567. Anal. Calcd. for C<sub>19</sub>H<sub>25</sub>NO<sub>6</sub>: C, 62.80; H, 6.93; N, 3.85. Found: C, 62.46; H, 6.81; N, 3.69.

**Preparation of dimethyl 4-(((4-(ethoxycarbonyl)cyclohexyl)methyl)carbamoyl)oxy)- isophthalate **14****

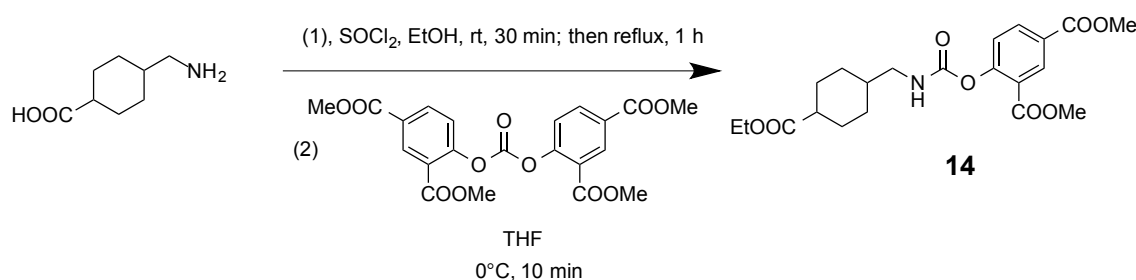

To a solution of SOCl<sub>2</sub> (0.5 mL, 6.9 mmol) in EtOH (20 mL), added 4-(aminomethyl)cyclohexane-1-carboxylic acid (847.2 mg, 5.39 mmol) at 0°C, the whole was stirred for 30 minutes at room temperature, then for 1 hour at reflux. After the reaction completed, poured into ice-water and quenched with 2M aqueous solution of NaOH (50 mL). Then, EtOAc (100 mL) was added and the mixture was washed with 2M aqueous solution of NaOH (50 mL x 2). The organic phase was washed with brine (30 mL), dried over Na<sub>2</sub>SO<sub>4</sub>, and the solvent was evaporated under reduced pressure to give a crude (947.6 mg). To a solution of tetramethyl 4,4'-(carbonylbis(oxy))diisophthalate **SI-1** (1362.0 mg, 3.05 mmol) in THF (8.0 mL), crude (947.6 mg) in THF (2.0 mL) was added at 0°C. The whole mixture was stirred for 10 minutes at 0°C. The reaction mixture was purified by column-chromatography on silica gel (eluent : EtOAc / n-Hexane = 2 / 3) to afford dimethyl 4-(((4-(ethoxycarbonyl)cyclohexyl)methyl)carbamoyl)oxy)isophthalate **14** (947.6 mg, 2.25 mmol, 42% in two steps) as a colorless solid. Mp. 122.3-123.2°C (colorless needles, recrystallized from CH<sub>2</sub>Cl<sub>2</sub>/n-Hexane). <sup>1</sup>H-NMR (CDCl<sub>3</sub>, 400 MHz) δ (ppm) (presence of two amide conformers): 8.646-8.607 (1H, m), 8.186 (1H, dd, *J* = 8.6, 2.0 Hz), 7.236 (1H, d, *J* = 8.4 Hz), 5.413 (0.89H, t, *J* = 13.2 Hz), 5.085 (0.11H, brs), 4.121 (2H, q, *J* = 6.8 Hz), 3.930 (3H, s), 3.883 (3H, s), 3.238 (0.24H, t, *J* = 6.4 Hz), 3.129 (1.84H, t, *J* = 6.4 Hz), 2.238 (1H, tt, *J* = 12.1, 3.6 Hz), 2.051-2.017 (2H, m), 1.929-1.850 (2H, m), 1.605-1.390 (3H, m), 1.250 (3H, t, *J* = 7.2 Hz), 1.015 (2H, qd, *J* =



13.2, 3.2 Hz).  $^{13}\text{C}$ -NMR ( $\text{CDCl}_3$ , 100 MHz)  $\delta$  (ppm): 176.33, 166.10, 165.05, 154.57, 154.35, 134.99, 133.49, 127.97, 124.78, 124.65, 60.69, 52.87, 52.81, 47.81, 43.72, 38.00, 30.06, 28.88, 14.70. HRMS (ESI-TOF,  $[\text{M}+\text{Na}]^+$ ): Calcd. for  $\text{C}_{21}\text{H}_{27}\text{NNaO}_8^+$ : 444.16129. Found: 444.1619. Anal. Calcd. for  $\text{C}_{21}\text{H}_{27}\text{NO}_8$ : C, 59.85; H, 6.46; N, 3.32. Found: C, 59.73; H, 6.35; N, 3.29.

#### Preparation of methyl 2-(((4-methoxyphenethyl)carbamoyl)oxy)benzoate **15**

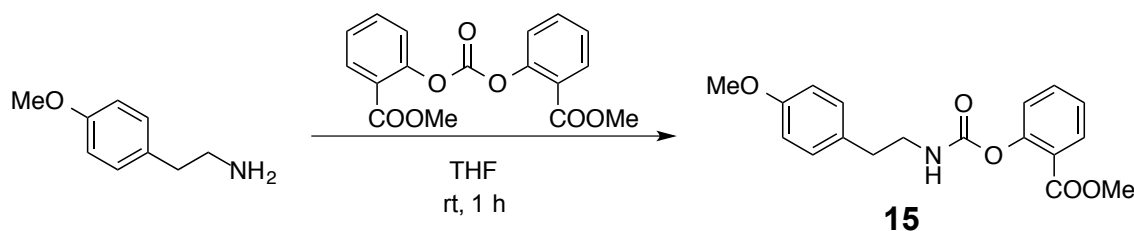

To a solution of dimethyl 2,2'-carboxybenzoate **SI-2** (1660.9 mg, 5.03 mmol) in THF (10.0 mL), a solution of 2-(4-methoxyphenethyl)ethan-1-amine (776.1 mg, 5.13 mmol) in THF (5.0 mL) was added at room temperature. The whole was stirred for 1 hour at room temperature. The reaction mixture was directly purified by column-chromatography on silica gel (eluent: EtOAc / *n*-Hexane = 1 / 1) to afford methyl 2-(((4-methoxyphenethyl)-carbamoyl)oxy)benzoate **15** (1630.2 mg, 4.95 mmol, 90%) as a colorless solid. Mp. 61.2-61.5°C (colorless cube, recrystallized from  $\text{CH}_2\text{Cl}_2$ /*n*-Hexane).  $^1\text{H}$ -NMR ( $\text{CDCl}_3$ , 400 MHz)  $\delta$  (ppm) (presence of two amide conformers): 7.954 (1H, dd,  $J = 8.0, 1.2$  Hz), 7.519 (1H, td,  $J = 7.8, 1.6$  Hz), 7.268 (1H, t,  $J = 7.2$  Hz), 7.192-7.128 (3H, m), 5.196 (0.93H, brs), 4.828 (0.14H, brs), 3.845 (3H, s), 3.792 (3H, s), 3.495 (2H, q,  $J = 6.8$  Hz), 2.839 (3H, t,  $J = 7.2$  Hz)  $^{13}\text{C}$ -NMR ( $\text{CDCl}_3$ , 100 MHz)  $\delta$  (ppm): 165.89, 158.94, 154.94, 151.21, 134.06, 132.01, 131.22, 130.35, 126.11, 124.67, 124.55, 114.70, 55.84, 52.64, 43.32, 35.68. HRMS (ESI-TOF,  $[\text{M}+\text{Na}]^+$ ): Calcd. for  $\text{C}_{19}\text{H}_{18}\text{NNaO}_5^+$ : 352.1152. Found: 352.1165. Anal. Calcd. for  $\text{C}_{19}\text{H}_{18}\text{NO}_5$ : C, 65.64; H, 5.82; N, 4.25. Found: C, 65.32; H, 5.79; N, 4.11.

#### Preparation of methyl 2-(((4-methylphenethyl)carbamoyl)oxy)benzoate **19**

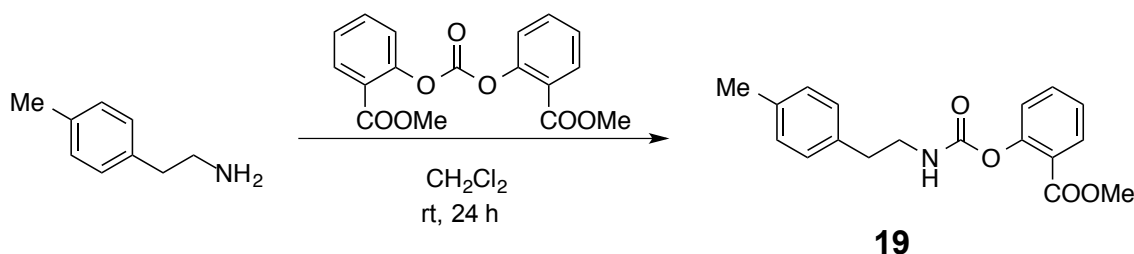

To a solution of dimethyl 2,2'-carboxybenzoate **SI-2** (2520.0 mg, 7.63 mmol) in  $\text{CH}_2\text{Cl}_2$  (15.0 mL), a solution of 2-(*para*-tolyl)ethan-1-amine (1061.9 mg, 7.85 mmol) in  $\text{CH}_2\text{Cl}_2$  (5.0 mL) was added at room temperature. The whole was stirred for 24 hours at

room temperature. The reaction mixture was directly purified by column-chromatography on silica gel (eluent: EtOAc / n-Hexane = 1 / 2) to afford methyl 2-(((4-methylphenethyl)carbamoyl)oxy)benzoate **19** (2318.8 mg, 7.40 mmol, 97%) as a colorless oil. <sup>1</sup>H-NMR (CDCl<sub>3</sub>, 400 MHz) δ (ppm) (presence of two amide conformers): 7.944 (1H, dd, *J* = 7.8, 1.2 Hz), 7.496 (1H, td, *J* = 8.0, 1.6 Hz), 7.246 (1H, t, *J* = 7.6 Hz), 7.136-7.096 (5H, m), 5.395 (0.88H, t, *J* = 5.6 Hz), 5.102 (0.17H, brs), 3.816 (3H, s), 3.474 (2H, q, *J* = 6.8 Hz), 2.827 (2H, t, *J* = 7.2 Hz), 2.315 (3H, s). <sup>13</sup>C-NMR (CDCl<sub>3</sub>, 100 MHz) δ (ppm): 165.82, 154.87, 151.05, 136.43, 136.00, 133.96, 131.86, 129.74, 129.13, 125.96, 124.55, 124.42, 52.51, 43.09, 35.94, 21.43. HRMS (ESI-TOF, [M+Na]<sup>+</sup>): Calcd. for C<sub>18</sub>H<sub>19</sub>NNaO<sub>4</sub><sup>+</sup>: 336.1206. Found: 336.1202. Anal. Calcd. for C<sub>18</sub>H<sub>19</sub>NO<sub>4</sub>+0.05 CH<sub>2</sub>Cl<sub>2</sub>: C, 68.26; H, 6.06; N, 4.41. Found: C, 68.13; H, 6.08; N, 4.43.

#### Preparation of methyl 2-((diphenylcarbamoyl)oxy)benzoate **26**

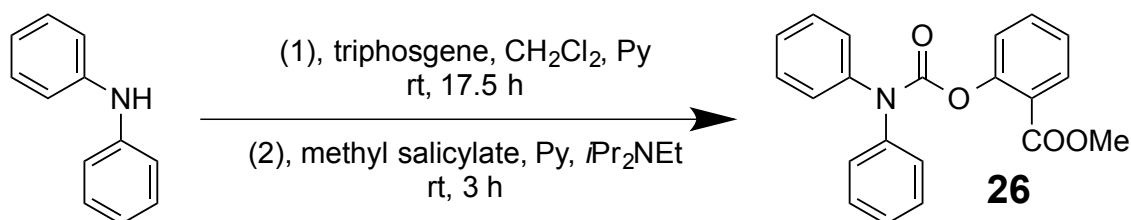

To a solution of triphosgene (300.3 mg, 1.01 mmol) in CH<sub>2</sub>Cl<sub>2</sub> (3.0 mL) was added a solution of diphenylamine (364.4 mg, 2.15 mmol) in CH<sub>2</sub>Cl<sub>2</sub> (4.0 mL) and dry pyridine (1.0 mL) at 0°C. The resulting mixture was stirred at 0°C for 15 min and at room temperature for an additional 17.5 hours. The reaction was quenched with 2M aqueous solution of HCl (20 mL). The reaction mixture was extracted with CH<sub>2</sub>Cl<sub>2</sub> (20 mL x 5). The organic phase was washed with brine (20 mL), dried over Na<sub>2</sub>SO<sub>4</sub>, and the solvent was evaporated to give the crude (498.9 mg). To a solution of methyl 2-hydroxybenzoate (518.3 mg, 3.41 mmol), pyridine (3.0 mL) and *i*Pr<sub>2</sub>NEt (0.5 mL, 2.87 mmol), a solution of the above crude (498.9 mg) in CH<sub>2</sub>Cl<sub>2</sub> (4.0 mL) was added at room temperature. The whole was stirred for 3 hours at room temperature. The crude reaction mixture was purified by column-chromatography on silica gel (eluent: EtOAc / n-Hexane = 1 / 2) to afford methyl 2-((diphenylcarbamoyl)oxy)benzoate **26** (636.2 mg, 1.83 mmol, 85%) as a colorless solid. Mp. 82.6-84.9°C (colorless needles, recrystallized from CH<sub>2</sub>Cl<sub>2</sub>/n-Hexane). <sup>1</sup>H-NMR (CDCl<sub>3</sub>, 400 MHz) δ (ppm): 7.976 (1H, d, *J* = 7.6 Hz), 7.519-7.340 (9H, m), 7.277-7.118 (4H, m), 3.907 (3H, s). <sup>13</sup>C-NMR (CDCl<sub>3</sub>, 100 MHz) δ (ppm): 165.51, 153.24, 151.24, 142.89, 134.05, 131.97, 129.43, 127.51, 126.92, 126.16, 124.22, 124.19, 52.64. HRMS (ESI-TOF, [M+Na]<sup>+</sup>): Calcd. for C<sub>21</sub>H<sub>17</sub>NNaO<sub>4</sub><sup>+</sup>: 370.10498. Found: 370.10432. Anal. Calcd. for C<sub>21</sub>H<sub>17</sub>NO<sub>4</sub>: C, 72.61; H, 4.93; N, 4.03.

Found: C, 72.77; H, 4.82; N, 4.12.

### Preparation of methyl 2-((4-(trifluoromethyl)benzoyl)oxy)benzoate **27**

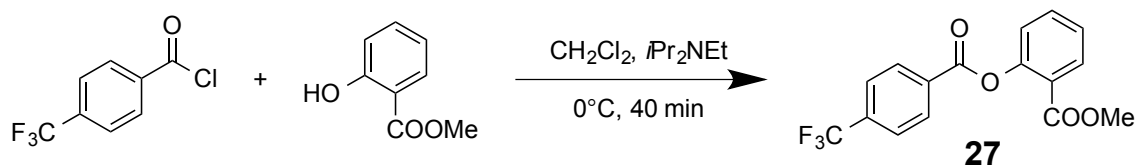

To a solution of methyl salicylate (15657.5 mg, 10.3 mmol) in  $\text{CH}_2\text{Cl}_2$  (20 mL) and  $i\text{Pr}_2\text{NEt}$  (9.0 mL), 4-(trifluoromethyl)benzoyl chloride (1823.9 mg, 8.74 mmol) in  $\text{CH}_2\text{Cl}_2$  (10 mL) was added at  $0^\circ\text{C}$ . The whole mixture was stirred for 40 minutes at  $0^\circ\text{C}$ . The reaction mixture was purified by column-chromatography on silica gel (eluent : EtOAc / n-Hexane = 1 / 4) to afford methyl 2-((4-(trifluoromethyl)benzoyl)oxy)benzoate **27** (1142.8 mg, 3.52 mmol, 40%) as a colorless solid. Mp.  $68.7\text{--}69.2^\circ\text{C}$  (colorless plates, recrystallized from  $\text{CH}_2\text{Cl}_2/\text{n-Hexane}$ ).  $^1\text{H-NMR}$  ( $\text{CDCl}_3$ , 400 MHz)  $\delta$  (ppm): 8.339 (2H, d,  $J = 8.0$  Hz), 8.091 (1H, dd,  $J = 7.8, 1.6$  Hz), 7.788 (2H, d,  $J = 8.0$  Hz), 7.627 (1H, td,  $J = 7.6, 2.0$  Hz), 7.383 (1H, td,  $J = 7.8, 1.2$  Hz), 7.252–7.230 (1H, m), 3.750 (3H, s).  $^{13}\text{C-NMR}$  ( $\text{CDCl}_3$ , 100 MHz)  $\delta$  (ppm): 165.33, 164.83, 151.14, 135.55 (q,  $J = 32$  Hz), 134.60, 133.39, 132.60, 131.25, 126.98, 126.22 (q,  $J = 3$  Hz), 124.39, 124.18 (q,  $J = 271$  Hz), 123.73, 52.81. HRMS (ESI-TOF,  $[\text{M}+\text{Na}]^+$ ): Calcd. for  $\text{C}_{16}\text{H}_{11}\text{F}_3\text{NaO}_4^+$ : 347.0507. Found: 347.0496. Anal. Calcd. for  $\text{C}_{16}\text{H}_{11}\text{F}_3\text{O}_4$ : C, 59.27; H, 3.42. Found: C, 59.08; H, 3.58.

### Preparation of 2-(methoxycarbonyl)phenyl methyl terephthalate **30**

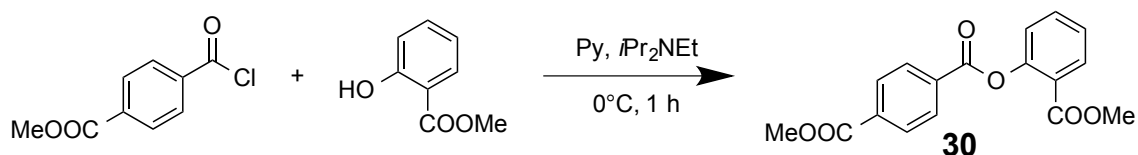

To a solution of methyl salicylate (6.0 mL, 46.9 mmol) in  $i\text{Pr}_2\text{NEt}$  (7.0 mL), methyl 4-(chlorocarbonyl)benzoate (8010.1 mg, 40.3 mmol) was added at  $20^\circ\text{C}$ . The whole mixture was stirred for 1 hour at  $20^\circ\text{C}$ . After the reaction completed, added 2M aqueous solution of HCl (60 mL). then extracted with  $\text{CH}_2\text{Cl}_2$  (50 mL x 4). The organic phase was washed with brine (40 mL), dried over  $\text{Na}_2\text{SO}_4$ , and the solvent was evaporated under reduced pressure to give a residue, which was column-chromatographed on silica-gel (eluent: EtOAc/n-Hexane = 1 / 2) to afford 2-(methoxycarbonyl)phenyl methyl terephthalate **30** (10901.6 mg, 34.7 mmol, 86%) as a colorless solid. Mp.  $117.5\text{--}118.4^\circ\text{C}$  (colorless cubes, recrystallized from  $\text{CH}_2\text{Cl}_2/\text{n-Hexane}$ ).  $^1\text{H-NMR}$  ( $\text{CDCl}_3$ , 400 MHz)  $\delta$  (ppm): 8.287 (2H, dt,  $J = 8.4, 1.2$  Hz), 8.180 (2H, dt,  $J = 8.4, 1.6$

(Hz), 8.084 (1H, dd,  $J = 7.8, 2.0$  Hz), 7.617 (1H, td,  $J = 7.7, 2.0$  Hz), 7.368 (1H, td,  $J = 7.6, 1.2$  Hz), 7.245 (1H, dd,  $J = 8.2, 1.2$  Hz), 3.966 (3H, s), 3.735 (3H, s).  $^{13}\text{C-NMR}$  ( $\text{CDCl}_3$ , 100 MHz)  $\delta$  (ppm): 166.74, 165.37, 165.16, 151.14, 134.97, 134.50, 133.85, 132.53, 130.76, 130.27, 126.84, 124.38, 123.79, 53.03, 52.74. HRMS (ESI-TOF,  $[\text{M}+\text{Na}]^+$ ): Calcd. for  $\text{C}_{17}\text{H}_{14}\text{NaO}_6^+$ : 337.0688. Found: 337.0670. Anal. Calcd. for  $\text{C}_{17}\text{H}_{14}\text{O}_6$ : C, 64.97; H, 4.49. Found: C, 64.84; H, 4.71.

### Preparation of methyl 2-(isobutyryloxy)benzoate **33**

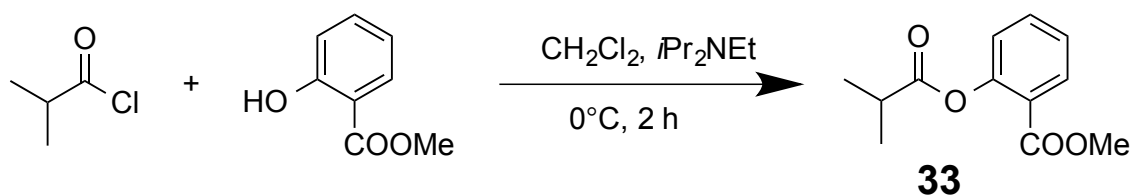

To a solution of methyl salicylate (2399.7 mg, 15.8 mmol) in  $i\text{Pr}_2\text{NEt}$  (3.0 mL), isobutyryl chloride (1178.8 mg, 11.1 mmol) in  $\text{CH}_2\text{Cl}_2$  (4.0 mL) was added at  $0^\circ\text{C}$ . The whole mixture was stirred for 2 hours at  $0^\circ\text{C}$ . The reaction mixture was purified by column-chromatography on silica gel (eluent : EtOAc / n-Hexane = 1 / 4) to afford methyl 2-(isobutyryloxy)benzoate **33** (2261.8 mg, 9.57 mmol, 87%) as a colorless oil.

$^1\text{H-NMR}$  ( $\text{CDCl}_3$ , 400 MHz)  $\delta$  (ppm): 8.011 (1H, s), 7.547 (1H, s), 7.300 (1H, s), 7.091 (1H, s), 3.865 (3H, s), 2.894 (1H, d,  $J = 5.6$  Hz), 1.371 (6H, s).  $^{13}\text{C-NMR}$  ( $\text{CDCl}_3$ , 100 MHz)  $\delta$  (ppm): 175.80, 165.47, 151.10, 134.07, 132.10, 126.24, 124.15, 124.01, 52.48, 34.56, 19.22. HRMS (ESI-TOF,  $[\text{M}+\text{Na}]^+$ ): Calcd. for  $\text{C}_{12}\text{H}_{14}\text{NaO}_4^+$ : 245.0790. Found: 245.0788. Anal. Calcd. for  $\text{C}_{12}\text{H}_{14}\text{O}_4$ : C, 64.85; H, 6.35. Found: C, 64.65; H, 6.38.

### Multiple Successive Electrophile Substitution Reactions in One Pot

General procedure for the acid-catalyzed amidation and acylation reactions are shown in Figure 1 and 2 of the main text.

(even though the reaction temperature is different, other procedures are same)

#### Acylation affording aromatic ketone **3c**

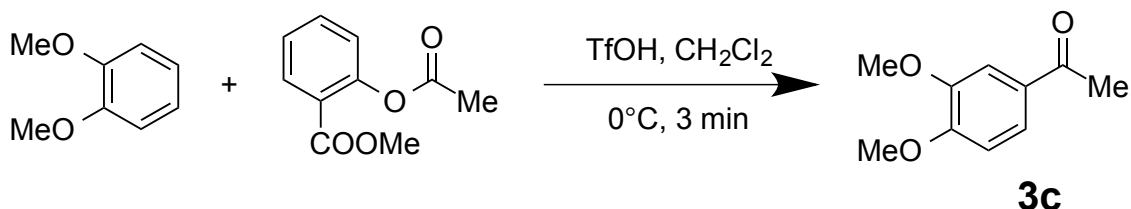

To a solution of 1,2-dimethoxy benzene (141.2 mg, 1.02 mmol) in TfOH (1.0 mL), methyl 2-acetoxybenzoate (196.7 mg, 1.01 mmol) was added at  $0^\circ\text{C}$ . The whole was stirred for 3 minutes at  $0^\circ\text{C}$ . After the reaction completed, the whole was poured into

ice-water. This reaction mixture was extracted with  $\text{CH}_2\text{Cl}_2$  (30 mL x 4). The organic phase was washed with brine (40 mL), dried over  $\text{Na}_2\text{SO}_4$ , and the solvent was evaporated under reduced pressure to give a residue, which was column-chromatographed on silica-gel (eluent: EtOAc / n-Hexane = 1 / 1) to afford 1-(3,4-dimethoxyphenyl)ethanone **3c** (149.8 mg, 0.83 mmol, 82%) as a colorless oil.

$^1\text{H-NMR}$  ( $\text{CDCl}_3$ , 400 MHz)  $\delta$  (ppm): 7.567 (1H, dd,  $J = 8.4, 2.0$  Hz), 7.519 (1H, d,  $J = 2.0$  Hz), 6.884 (1H, d,  $J = 8.4$  Hz), 3.938 (3H, s), 3.927 (3H, s), 2.557 (3H, s).  $^{13}\text{C-NMR}$  ( $\text{CDCl}_3$ , 100 MHz)  $\delta$  (ppm): 197.07, 153.71, 149.40, 130.89, 123.65, 110.52, 110.41, 56.43, 56.34, 26.54. HRMS (ESI-TOF,  $[\text{M}+\text{Na}]^+$ ): Calcd. for  $\text{C}_{10}\text{H}_{12}\text{NaO}_3^+$ : 203.0679. Found: 203.0654. Anal. Calcd. for  $\text{C}_{10}\text{H}_{12}\text{O}_3$ : C, 66.65; H, 6.71. Found: C, 66.50; H, 6.61.

#### Aromatic Amidation to give amide **3a**

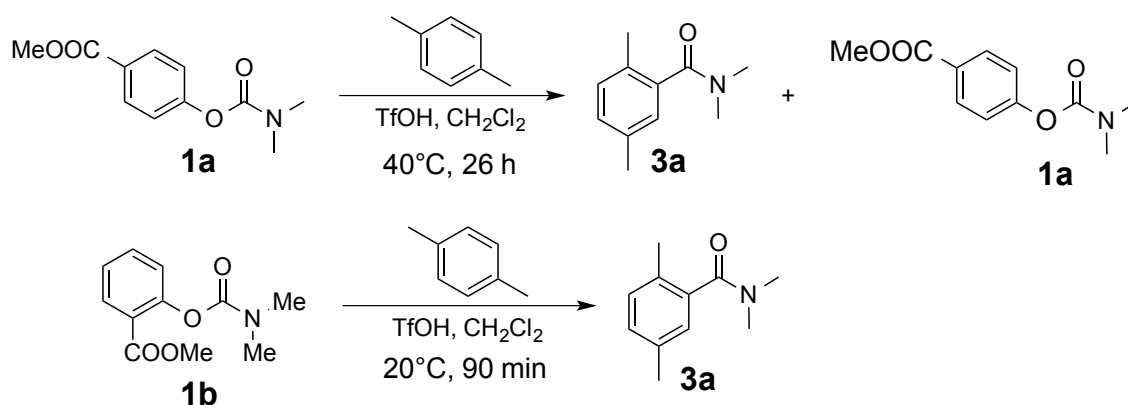

**3a**: colorless oil.  $^1\text{H-NMR}$  ( $\text{CDCl}_3$ , 400 MHz)  $\delta$  (ppm): 7.087-7.039 (2H, m), 6.973 (1H, s), 3.115 (3H, s), 2.822 (3H, s), 2.297 (3H, s), 2.225 (3H, s).  $^{13}\text{C-NMR}$  ( $\text{CDCl}_3$ , 100 MHz)  $\delta$  (ppm): 172.09, 137.04, 135.87, 131.05, 130.57, 129.83, 126.68, 38.73, 34.87, 21.26, 18.77. HRMS (ESI-TOF,  $[\text{M}+\text{Na}]^+$ ): Calcd. for  $\text{C}_{11}\text{H}_{15}\text{NNaO}^+$ : 200.10458. Found: 200.10426. Anal. Calcd. for  $\text{C}_{11}\text{H}_{15}\text{NO}+0.23\text{H}_2\text{O}$ : C, 72.84; H, 8.59; N, 7.72. Found: C, 72.59; H, 8.21; N, 7.63.

#### Aromatic Amidation to give amide **3b**

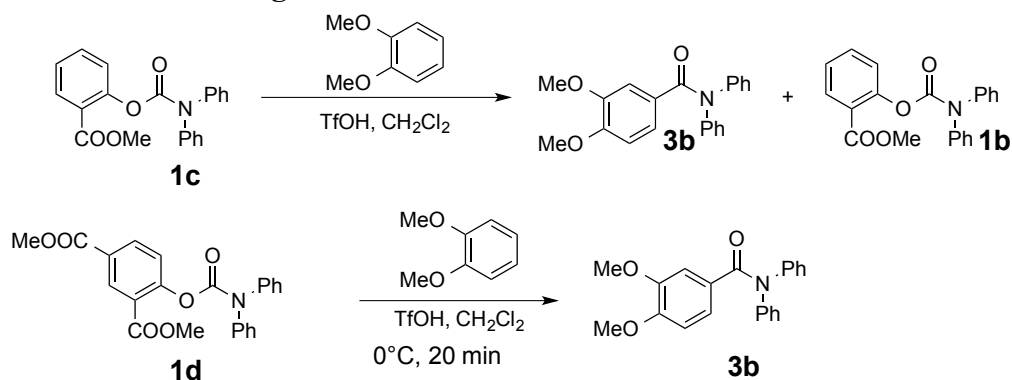

**3b**: Mp. 159.2-160.0°C (colorless needles, recrystallized from CH<sub>2</sub>Cl<sub>2</sub>/n-Hexane). <sup>1</sup>H-NMR (CDCl<sub>3</sub>, 400 MHz) δ (ppm): 7.286 (4H, t, *J* = 8.0 Hz), 7.188-7.104 (7H, m), 6.993 (1H, d, *J* = 2.0 Hz), 6.675 (1H, d, *J* = 8.0 Hz), 3.820 (3H, s), 3.651 (3H, s). <sup>13</sup>C-NMR (CDCl<sub>3</sub>, 100 MHz) δ (ppm): 170.52, 151.17, 148.43, 144.86, 129.58, 128.37, 127.87, 126.64, 123.91, 113.12, 110.44, 56.28, 56.17. HRMS (ESI-TOF, [M+Na]<sup>+</sup>): Calcd. for C<sub>21</sub>H<sub>19</sub>NNaO<sub>3</sub><sup>+</sup>: 356.12571. Found: 356.12513. Anal. Calcd. for C<sub>21</sub>H<sub>19</sub>NO<sub>3</sub>: C 75.66; H, 5.74; N, 4.20. Found: C, 75.49; H, 5.97; N, 4.17.

**Dual amidation in one pot to give 7 (Table 1, Entry 1)**

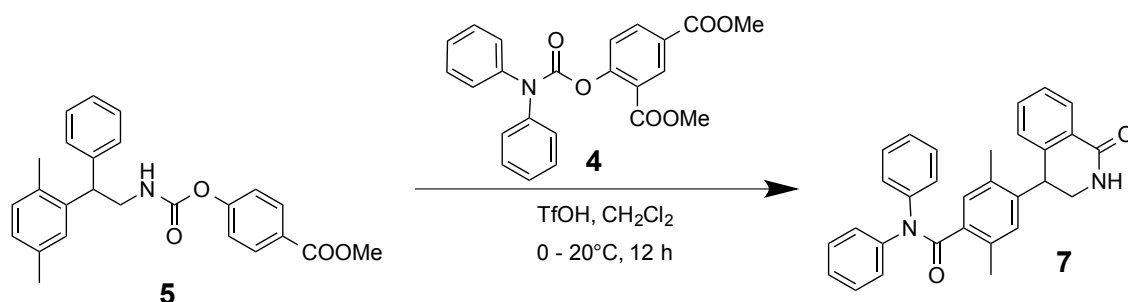

To TfOH (2.0 mL), methyl 4-(((2-(2,5-dimethylphenyl)-2-phenylethyl)carbamoyl)oxy)benzoate **5** (222.5 mg, 0.50 mmol) in CH<sub>2</sub>Cl<sub>2</sub> (0.5 mL) was added at 0°C. Then, dimethyl 4-((diphenylcarbamoyl)oxy)isophthalate **4** (202.9 mg, 0.50 mmol) in CH<sub>2</sub>Cl<sub>2</sub> (1.0 mL) was added at 0°C. The whole was warmed up from 0°C to 20°C, and stirred for 12 hours. After the reaction completed, the whole was poured into ice-water. Added 2M aqueous solution of NaOH (50 mL), and this reaction mixture was extracted with CH<sub>2</sub>Cl<sub>2</sub> (40 mL x 3). The organic phase was washed with brine (40 mL), dried over Na<sub>2</sub>SO<sub>4</sub>, and the solvent was evaporated under reduced pressure to give a residue, which was column-chromatographed on silica-gel (eluent: Acetone / n-Hexane = 4 / 3) to afford 2,5-dimethyl-4-(1-oxo-1,2,3,4-tetrahydroisoquinolin-4-yl)-*N,N*-diphenylbenzamide **7** (191.7 mg, 0.43 mmol, 86%) as a colorless solid. Mp. 240.7-241.3°C (colorless plates, recrystallized from CH<sub>2</sub>Cl<sub>2</sub>/n-Hexane). <sup>1</sup>H-NMR (CDCl<sub>3</sub>, 400 MHz) δ (ppm): 8.133 (1H, dd, *J* = 9.2, 3.6 Hz), 7.394-6.969 (16H, m), 6.831-6.796 (2H, m), 6.760 (1H, s), 5.617 (1H, t, *J* = 6.0 Hz), 4.550 (1H, t, *J* = 7.2 Hz), 3.634 (2H, dd, *J* = 7.8, 2.8 Hz), 3.485 (2H, q, *J* = 6.4 Hz), 2.749 (2H, t, *J* = 6.8 Hz), 2.413 (3H, s), 2.342 (3H, s), 2.220 (3H, s). <sup>13</sup>C-NMR (CDCl<sub>3</sub>, 100 MHz) δ (ppm): 171.33, 166.81, 143.51, 141.94, 139.49, 136.06, 133.96, 133.79, 132.91, 130.88, 130.66, 129.63, 129.45, 128.58, 127.89, 127.74, 127.49, 127.03, 46.13, 40.50, 19.81, 19.58. HRMS (ESI-TOF, [M+Na]<sup>+</sup>): Calcd. for C<sub>30</sub>H<sub>26</sub>N<sub>2</sub>NaO<sub>2</sub><sup>+</sup>: 469.1886. Found: 469.1876. Anal. Calcd. for C<sub>30</sub>H<sub>26</sub>N<sub>2</sub>O<sub>2</sub>+0.2 H<sub>2</sub>O:

C, 80.05; H, 5.91; N, 6.22. Found: C, 80.13; H, 6.17; N, 6.07.

**Dual amidation in one pot to give 10 (Table 1, Entry 2)**

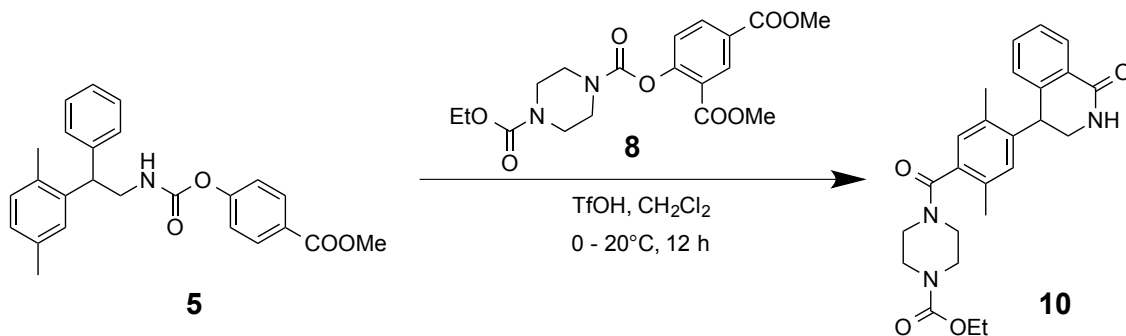

To TfOH (2.0 mL), methyl 4-(((2-(2,5-dimethylphenyl)-2-phenylethyl)carbamoyl)oxy)benzoate **5** (222.7 mg, 0.50 mmol) in CH<sub>2</sub>Cl<sub>2</sub> (0.5 mL) was added at 0°C. Then, 1-(2,4-bis(methoxycarbonyl)phenyl) 4-ethyl piperazine-1,4-dicarboxylate **8** (203.7 mg, 0.52 mmol) in CH<sub>2</sub>Cl<sub>2</sub> (0.5 mL) was added at 0°C. The whole was warmed up from 0°C to 20°C, and stirred for 12 hours. After the reaction completed, the whole was poured into ice-water. Added 2M aqueous solution of NaOH, (40 mL), and this reaction mixture was extracted with CH<sub>2</sub>Cl<sub>2</sub> (40 mL x 3). The organic phase was washed with brine (40 mL), dried over Na<sub>2</sub>SO<sub>4</sub>, and the solvent was evaporated under reduced pressure to give a residue, which was column-chromatographed on silica-gel (eluent: EtOAc / n-Hexane = 2 / 1) to afford ethyl 4-(2,5-dimethyl-4-(1-oxo-1,2,3,4-tetrahydroisoquinolin-4-yl)benzoyl)piperazine-1-carboxylate **10** (78.2 mg, 0.18 mmol, 36%) as a colorless solid. Mp. 195.9-196.6°C (colorless plates, recrystallized from CH<sub>2</sub>Cl<sub>2</sub>/n-Hexane). <sup>1</sup>H-NMR (CDCl<sub>3</sub>, 400 MHz) δ (ppm): 8.080 (1H, s), 7.342 (2H, s), 6.979 (1H, s), 6.837-6.564 (3H, m), 4.514-4.480 (1H, m), 4.068 (2H, q, *J* = 6.8 Hz), 3.755-3.195 (10H, m), 2.301 (3H, s), 2.080 (3H, s), 1.211-1.179 (3H, m). <sup>13</sup>C-NMR (CDCl<sub>3</sub>, 100 MHz) δ (ppm): 170.07, 166.42, 155.37, 141.13, 139.45, 134.71, 134.15, 132.69, 132.03, 130.99, 130.54, 129.14, 128.11, 127.47, 61.79, 46.61, 45.80, 44.13, 43.63, 41.35, 39.94, 19.29, 18.70, 14.62. HRMS (ESI-TOF, [M+Na]<sup>+</sup>): Calcd. for C<sub>25</sub>H<sub>29</sub>N<sub>3</sub>NaO<sub>4</sub><sup>+</sup>: 458.2050. Found: 458.2030. Anal. Calcd. for C<sub>25</sub>H<sub>29</sub>N<sub>3</sub>O+0.6 C<sub>6</sub>H<sub>12</sub>+1.1 CH<sub>2</sub>Cl<sub>2</sub>: C, 61.44; H, 6.87; N, 7.24. Found: C, 61.54; H, 6.57; N, 7.32.

**Dual amidation in one pot to give 13 (Table 1, Entry 3)**

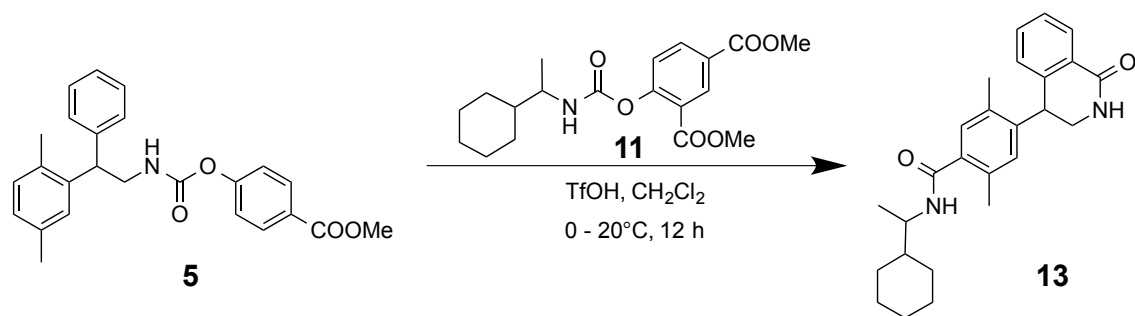

To TfOH (2.0 mL), methyl 4-(((2-(2,5-dimethylphenyl)-2-phenylethyl)carbamoyl)oxy)benzoate **5** (223.4 mg, 0.50 mmol) in CH<sub>2</sub>Cl<sub>2</sub> (2.0 mL) was added at 0°C. Then, dimethyl 4-(((1-cyclohexylethyl)carbamoyl)oxy)isophthalate **11** (182.6 mg, 0.50 mmol) was added at 0°C. The whole was warmed up from 0°C to 20°C, and stirred for 12 hours. After the reaction completed, the whole was poured into ice-water. Added 2M aqueous solution of NaOH (50 mL), and this reaction mixture was extracted with CH<sub>2</sub>Cl<sub>2</sub> (50 mL x 3). The organic phase was washed with brine (40 mL), dried over Na<sub>2</sub>SO<sub>4</sub>, and the solvent was evaporated under reduced pressure to give a residue, which was column-chromatographed on silica-gel (eluent: EtOAc / n-Hexane = 4 / 1) to afford *N*-(1-cyclohexylethyl)-2,5-dimethyl-4-(1-oxo-1,2,3,4-tetrahydroisoquinolin-4-yl)benzamide **13** (110.5 mg, 0.27 mmol, 55%) as a colorless solid. Mp. 236.2-236.5°C (colorless plates, recrystallized from CH<sub>2</sub>Cl<sub>2</sub>/n-Hexane). <sup>1</sup>H-NMR (CDCl<sub>3</sub>, 400 MHz) δ (ppm): 8.169-8.146 (1H, m), 7.431-7.380 (2H, m), 7.244 (1H, s), 6.968 (1H, brs), 6.853-6.798 (2H, m), 5.641 (1H, d, *J* = 8.8 Hz), 4.590 (1H, t, *J* = 7.2 Hz), 4.136-4.046 (1H, m), 3.725-3.678 (2H, m), 2.390 (3H, s), 2.312 (3H, s), 1.855-0.934 (14H, m). <sup>13</sup>C-NMR (CDCl<sub>3</sub>, 100 MHz) δ (ppm): 169.70, 166.84, 141.77, 140.31, 136.70, 134.34, 133.97, 133.05, 131.40, 129.68, 129.51, 128.65, 127.89, 127.80, 50.26, 46.33, 43.66, 40.55, 29.70, 29.62, 26.91, 26.69, 19.94, 19.72, 18.63. HRMS (ESI-TOF, [M+Na]<sup>+</sup>): Calcd. for C<sub>26</sub>H<sub>32</sub>N<sub>2</sub>NaO<sub>2</sub><sup>+</sup>: 427.2361. Found: 427.2340. Anal. Calcd. for C<sub>26</sub>H<sub>32</sub>N<sub>2</sub>O<sub>2</sub>+0.8 H<sub>2</sub>O: C, 74.54; H, 8.08; N, 6.69. Found: C, 74.31; H, 7.97; N, 6.38.



### Dual amidation in one pot to give **18** (Table 1, Entry 4)

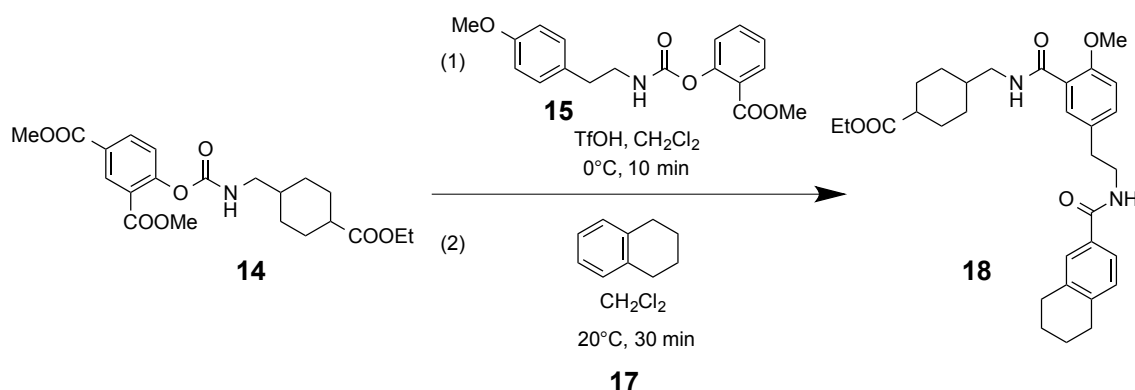

To  $\text{TfOH}$  (2.0 mL), methyl 2-(((4-methoxyphenethyl)carbamoyl)oxy)benzoate **15** (170.5 mg, 0.52 mmol) was added at  $0^\circ\text{C}$ . Then, dimethyl 4-(((4-(ethoxycarbonyl)cyclohexyl)methyl)carbamoyl)oxy)isophthalate **14** (210.7 mg, 0.50 mmol) in  $\text{CH}_2\text{Cl}_2$  (1.0 mL) was added at  $0^\circ\text{C}$ . The whole was stirred for 15 minutes. Then, 1,2,3,4-tetrahydronaphthalene **17** (133.1 mg, 1.01 mmol) in  $\text{CH}_2\text{Cl}_2$  (1.0 mL) was added at  $0^\circ\text{C}$ . The whole was warmed up from  $0^\circ\text{C}$  to  $20^\circ\text{C}$ , and stirred for 30 minutes. After the reaction completed, the whole was poured into ice-water. This reaction mixture was extracted with  $\text{CH}_2\text{Cl}_2$  (40 mL x 3). The organic phase was washed with brine (40 mL), dried over  $\text{Na}_2\text{SO}_4$ , and the solvent was evaporated under reduced pressure to give a residue, which was column-chromatographed on silica-gel (eluent:  $\text{EtOAc} / \text{n-Hexane} = 2 / 1$ ) to afford ethyl 4-((2-methoxy-5-(2-(5,6,7,8-tetrahydronaphthalene-2-carboxamido)ethyl)benzamido)methyl)cyclohexane-1-carboxylate **18** (175.2 mg, 0.34 mmol, 67%) as a yellow solid. Mp.  $123.9\text{--}124.3^\circ\text{C}$  (yellow plates, recrystallized from  $\text{CH}_2\text{Cl}_2/\text{n-Hexane}$ ).  $^1\text{H-NMR}$  ( $\text{CDCl}_3$ , 400 MHz)  $\delta$  (ppm) (presence of two amide conformers): 8.068–8.055 (1H, m), 7.935 (1H, t,  $J = 6.0$  Hz), 7.447 (0.66H, s), 7.407 (0.68H, dd,  $J = 8.0, 1.6$  Hz), 7.358–7.285 (1H, m), 7.061–7.029 (1.65H, m), 6.925 (1H, t,  $J = 8.0$  Hz), 6.462 (0.64H, t,  $J = 5.6$  Hz), 5.984 (0.30H, t,  $J = 6.0$  Hz), 4.111 (2H, q,  $J = 7.2$  Hz), 3.950–3.943 (3H, m), 3.673 (2H, quintet,  $J = 6.4$  Hz), 3.316 (2H, t,  $J = 6.0$  Hz), 2.923–2.888 (2H, m), 2.756–2.743 (4H, m), 2.228 (1H, tt,  $J = 12.3, 3.6$  Hz), 2.011 (2H, dd,  $J = 13.4, 2.8$  Hz), 1.878 (2H, dd,  $J = 13.0, 2.4$  Hz), 1.810–1.720 (4H, m), 1.626–1.534 (1H, m), 1.431 (2H, qd,  $J = 13.2, 3.2$  Hz), 1.245 (3H, t,  $J = 7.2$  Hz), 1.041 (2H, qd,  $J = 13.0, 3.2$  Hz).  $^{13}\text{C-NMR}$  ( $\text{CDCl}_3$ , 100 MHz)  $\delta$  (ppm): 176.41, 171.00, 168.23, 165.77, 165.70, 156.63, 156.57, 141.40, 138.53, 137.85, 137.36, 135.22, 133.49, 133.45, 132.86, 132.74, 132.43, 132.24, 132.18, 131.16, 129.66, 128.33, 125.68, 124.36, 124.26, 122.05, 122.02, 112.23, 60.67, 56.65, 56.63, 46.09, 43.83, 41.48, 41.07, 37.95, 35.22, 35.19, 30.41, 30.29, 29.87, 29.80, 29.01, 27.15,

23.47, 23.41, 23.14, 14.72. HRMS (ESI-TOF,  $[M+Na]^+$ ): Calcd. for  $C_{31}H_{40}N_2NaO_5^+$ : 543.2829. Found: 543.2829. Anal. Calcd. for  $C_{31}H_{40}N_2O_5+0.1 H_2O$ : C, 71.27; H, 7.76; N, 5.36. Found: C, 71.00; H, 7.88; N, 5.31.

**Dual amidation in one pot to give 22 (Table 1, Entry 5)**

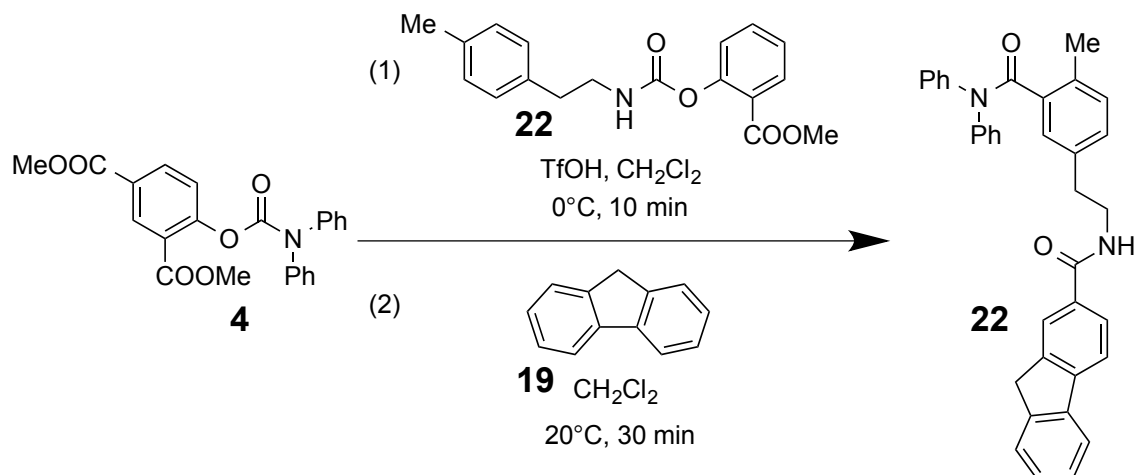

To  $TfOH$  (2.0 mL), methyl 2-(((4-methylphenethyl)carbamoyl)oxy)benzoate **22** (157.0 mg, 0.50 mmol) was added at  $0^\circ C$ . Then, dimethyl 4-((diphenylcarbamoyl)oxy)isophthalate **4** (206.1 mg, 0.51 mmol) in  $CH_2Cl_2$  (1.0 mL) was added at  $0^\circ C$ . The whole was stirred for 20 minutes. Then, 9H-fluorene **19** (169.8 mg, 1.02 mmol) in  $CH_2Cl_2$  (1.0 mL) was added at  $0^\circ C$ . The whole was warmed up from  $0^\circ C$  to  $20^\circ C$ , and stirred for 30 minutes. After the reaction completed, the whole was poured into ice-water. This reaction mixture was extracted with  $CH_2Cl_2$  (40 mL x 3). The organic phase was washed with brine (40 mL), dried over  $Na_2SO_4$ , and the solvent was evaporated under reduced pressure to give a residue, which was column-chromatographed on silica-gel (eluent:  $EtOAc / n\text{-Hexane} / CH_2Cl_2 = 1 / 1 / 1$ ) to afford *N*-(3-(diphenylcarbamoyl)-4-methylphenethyl)-9H-fluorene-2-carboxamide **22** (161.1 mg, 0.31 mmol, 62%) as a yellow amorphous material.  $^1H\text{-NMR}$  ( $CDCl_3$ , 400 MHz)  $\delta$  (ppm): 7.870 (1H, s), 7.799-7.744 (2H, m), 7.637 (1H, d,  $J = 8.0$  Hz), 7.538 (1H, d,  $J = 7.6$  Hz), 7.404-6.944 (15H, m), 6.158 (1H, t,  $J = 6.4$  Hz), 3.882 (2H, s), 3.476 (2H, q,  $J = 6.8$  Hz), 2.733 (2H, t,  $J = 6.8$  Hz), 2.418 (3H, s).  $^{13}C\text{-NMR}$  ( $CDCl_3$ , 100 MHz)  $\delta$  (ppm): 171.38, 168.20, 145.34, 144.51, 143.92, 143.46, 141.12, 137.18, 136.40, 134.23, 133.29, 131.24, 130.25, 129.47, 128.74, 128.13, 127.82, 127.46, 127.07, 126.19, 125.69, 124.31, 121.01, 120.16, 41.48, 37.36, 35.35, 19.78. HRMS (ESI-TOF,  $[M+Na]^+$ ): Calcd. for  $C_{36}H_{30}N_2NaO_2^+$ : 545.2199. Found: 545.2200. Anal. Calcd. for  $C_{36}H_{30}N_2O_2+0.7 H_2O$ : C, 80.78; H, 5.91; N, 5.23. Found: C, 80.58; H, 6.01; N, 5.15.

### Dual amidation in one pot to **25** (Table 1, Entry 6)

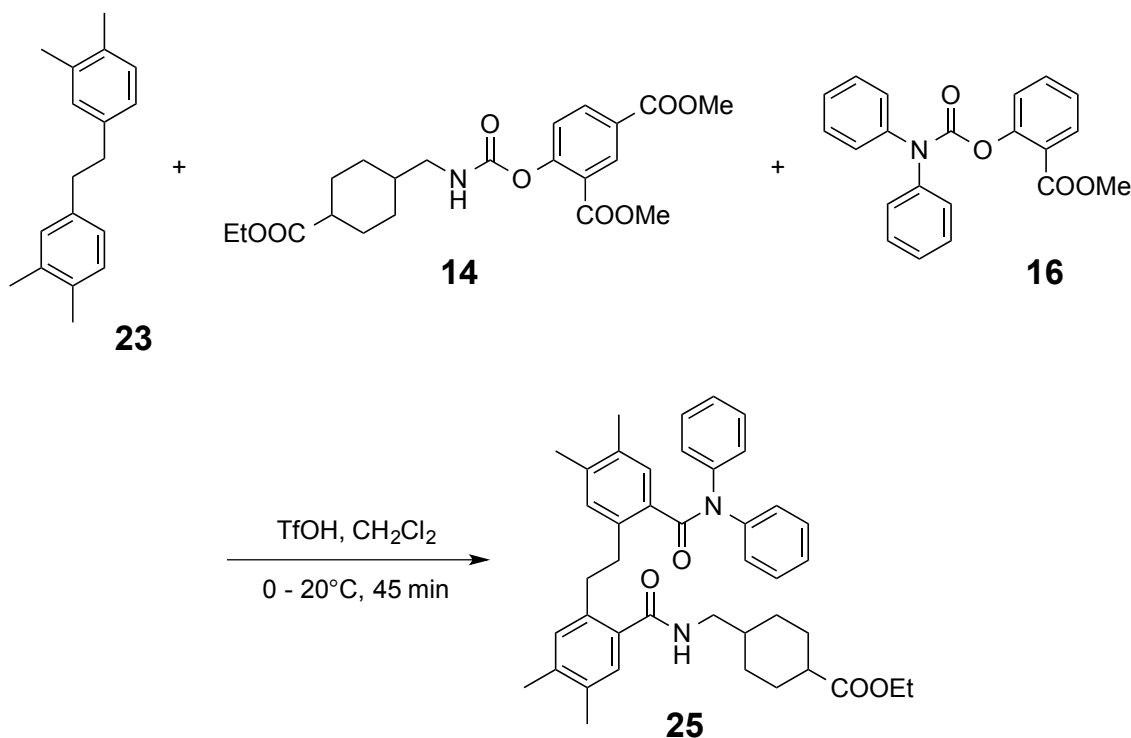

To a solution of 1,2-bis(3,4-dimethylphenyl)ethane **14** (120.3 mg, 0.51 mmol), dimethyl 4-(((4-(ethoxycarbonyl)cyclohexyl)methyl)carbamoyl)oxy)isophthalate **23** (210.8 mg, 0.50 mmol) and methyl 2-((diphenylcarbamoyl)oxy)benzoate **16** (175.9 mg, 0.51 mmol) in CH<sub>2</sub>Cl<sub>2</sub> (1.0 mL), TfOH (2.0 mL) was added at 0°C. The whole was stirred for 15 minutes. Then, the whole was warmed up from 0°C to 20°C, and stirred for 1 hour. After the reaction completed, the whole was poured into ice-water and added 2M aqueous solution of NaOH (30 mL). This reaction mixture was extracted with CH<sub>2</sub>Cl<sub>2</sub> (40 mL x 3). The organic phase was washed with brine (40 mL), dried over Na<sub>2</sub>SO<sub>4</sub>, and the solvent was evaporated under reduced pressure to give a residue, which was column-chromatographed on silica-gel (eluent: EtOAc / n-Hexane = 1 / 2) to afford ethyl 4-(((2-(2-(diphenylcarbamoyl)-4,5-dimethylphenethyl)-4,5-dimethylbenzamido)methyl)cyclohexane-1-carboxylate) **25** (155.3 mg, 0.24 mmol, 48 %) as a colorless oil.

<sup>1</sup>H-NMR (CDCl<sub>3</sub>, 400 MHz) δ (ppm) (presence of two amide conformers): 7.181-6.792 (14H, m), 6.101-6.032 (1H, m), 4.028 (2H, q, *J* = 7.2 Hz), 3.103 (2H, t, *J* = 6.4 Hz), 2.994-2.865 (5H, m), 2.157-2.122 (6H, m), 2.053 (3H, s), 1.954 (3H, m), 1.873-1.692 (5H, m), 1.411-1.337 (1H, m), 1.267 (2H, qd, *J* = 13.2, 3.2 Hz), 1.162 (3H, t, *J* = 7.2 Hz), 0.856 (2H, qd, *J* = 12.8, 3.6 Hz). <sup>13</sup>C-NMR (CDCl<sub>3</sub>, 100 MHz) δ (ppm): 175.96, 175.88, 171.14, 171.10, 170.84, 170.34, 143.44, 143.34, 138.38, 138.03, 137.86, 137.80,

137.47, 137.25, 136.92, 135.70, 134.68, 134.33, 134.25, 133.55, 133.52, 133.33, 133.25, 132.55, 131.52, 131.06, 130.88, 130.13, 129.35, 129.05, 128.92, 128.53, 127.42, 126.90, 126.75, 126.31, 126.28, 60.39, 60.13, 53.45, 45.66, 45.45, 43.32, 43.28, 37.36, 37.18, 35.24, 34.99, 34.93, 34.78, 29.97, 29.86, 28.49, 28.44, 21.04, 19.90, 19.64, 19.57, 19.19, 19.03, 16.51, 14.25. HRMS (ESI-TOF,  $[M+Na]^+$ ): Calcd. for  $C_{40}H_{37}N_3NaO_3^+$ : 630.2727. Found: 630.2731. Anal. Calcd. for  $C_{40}H_{37}N_3O_3+0.6 CH_2Cl_2$ : C, 74.03; H, 5.85; N, 6.38. Found: C, 74.06; H, 6.07; N, 6.18.

### Sequential aromatic acylation-amidation reaction to **29** (Table 2, Entry 1)

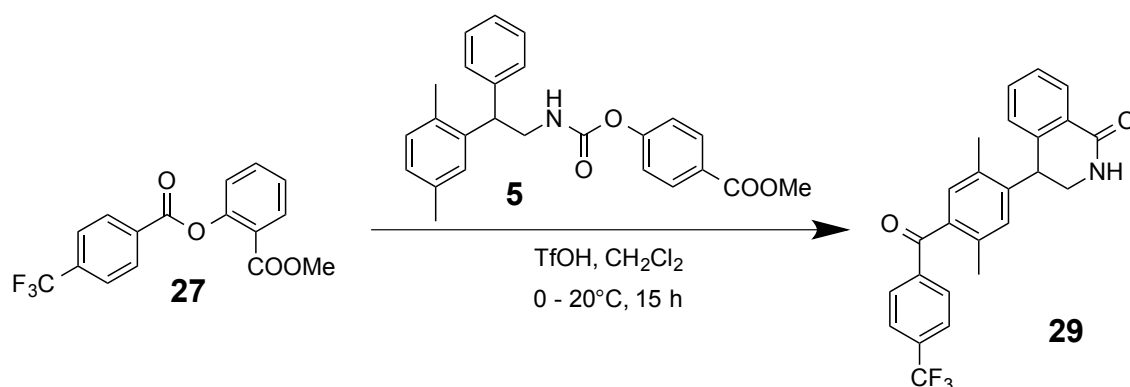

To a mixture of TfOH (2.0 mL), methyl 4-(((2-(2,5-dimethylphenyl)-2-phenylethyl)carbamoyl)oxy)benzoate **5** (441.8 mg, 1.1 mmol) in CH<sub>2</sub>Cl<sub>2</sub> (2.0 mL) was slowly added at 0°C. Then, methyl 2-((4-(trifluoromethyl)benzoyl)oxy)benzoate **27** (359.4 mg, 1.11 mmol) was added at 0°C. The whole was warmed up from 0°C to 20°C, and stirred for 15 hours. After the reaction completed, the whole was poured into ice-water. This reaction mixture was extracted with CH<sub>2</sub>Cl<sub>2</sub> (30 mL x 4). The organic phase was washed with brine (40 mL), dried over Na<sub>2</sub>SO<sub>4</sub>, and the solvent was evaporated under reduced pressure to give a residue, which was column-chromatographed on silica-gel (eluent: EtOAc / n-Hexane = 1/1) to afford 4-(2,5-dimethyl-4-(4-(trifluoromethyl)benzoyl)phenyl)-3,4-dihydroisoquinolin-1(2H)-one **29** (367.5 mg, 0.87 mmol, 79%) as a colorless solid. Mp. 237.2-237.9°C (colorless needles, recrystallized from EtOAc). <sup>1</sup>H-NMR (DMSO-d<sub>6</sub>, 400 MHz) δ (ppm): 8.002-7.888 (6H, m), 7.458 (2H, td, *J* = 24.5, 7.2 Hz), 7.276 (1H, s), 6.973 (1H, d, *J* = 7.2 Hz), 6.779 (1H, s), 4.619 (1H, t, *J* = 6.0 Hz), 3.699-3.524 (2H, m), 2.394 (3H, s), 2.102 (3H, s). <sup>13</sup>C-NMR (DMSO-d<sub>6</sub>, 100 MHz) δ (ppm): 196.52, 164.35, 142.46, 141.00, 140.68, 135.64, 134.06, 133.65, 132.53 (q, *J* = 32 Hz), 132.20, 131.02, 130.81, 130.32, 129.86, 127.46, 127.27, 127.23, 125.79 (q, *J* = 4 Hz), 123.76 (q, *J* = 271 Hz), 44.44, 39.16, 19.43, 18.68. HRMS (ESI-TOF,  $[M+Na]^+$ ): Calcd. for  $C_{25}H_{20}F_3NNaO_2^+$ : 446.1338. Found: 446.1334. Anal. Calcd. for  $C_{25}H_{20}F_3NO_2+0.8 H_2O$ :

C, 68.58; H, 4.97; N, 3.20. Found: C, 68.74; H, 5.04; N, 3.09.

### Sequential aromatic acylation-amidation reaction **32** (Table 2, Entry 2)

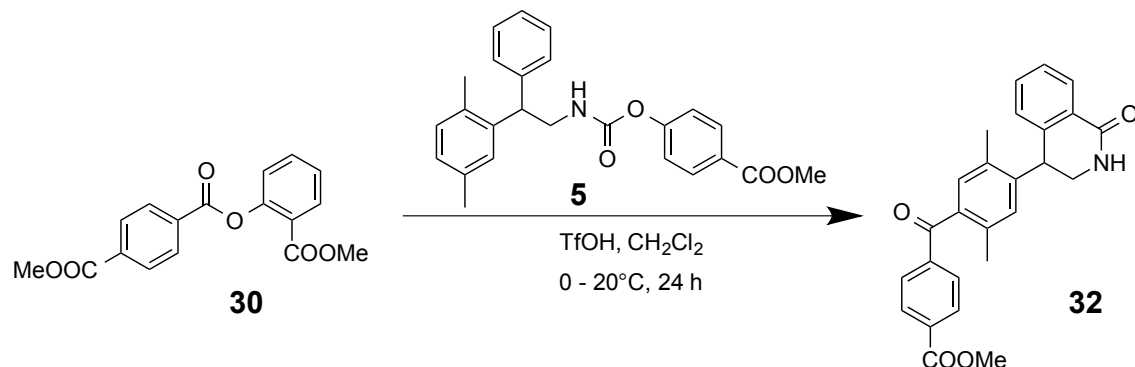

To a mixture of  $\text{TfOH}$  (1.0 mL), methyl 4-(((2-(2,5-dimethylphenyl)-2-phenylethyl)carbamoyl)oxy)benzoate **5** (224.0 mg, 0.50 mmol) in  $\text{CH}_2\text{Cl}_2$  (1.0 mL) was slowly added at  $0^\circ\text{C}$ . Then, 2-(methoxycarbonyl)phenyl methyl terephthalate **30** (165.7 mg, 0.53 mmol) was added at  $0^\circ\text{C}$ . The whole was warmed up from  $0^\circ\text{C}$  to  $20^\circ\text{C}$ , and stirred for 11 hours. After the reaction completed, the whole was poured into ice-water. This reaction mixture was extracted with  $\text{CH}_2\text{Cl}_2$  (30 mL x 4). The organic phase was washed with brine (40 mL), dried over  $\text{Na}_2\text{SO}_4$ , and the solvent was evaporated under reduced pressure to give a residue, which was column-chromatographed on silica-gel (eluent:  $\text{EtOAc}$  /  $n\text{-Hexane}$  = 4 / 1) to afford methyl 4-(2,5-dimethyl-4-(1-oxo-1,2,3,4-tetrahydroisoquinolin-4-yl)benzoyl)benzoate **32** (148.7 mg, 0.36 mmol, 72%) as a colorless solid. Mp.  $231.8\text{-}232.7^\circ\text{C}$  (colorless needles, recrystallized from  $\text{EtOAc}$ ).  $^1\text{H-NMR}$  ( $\text{DMSO-d}_6$ , 400 MHz)  $\delta$  (ppm): 8.114 (2H, d,  $J = 8.0$  Hz), 7.996-7.976 (2H, m), 7.829 (2H, d,  $J = 8.0$  Hz), 7.499 (1H, t,  $J = 6.8$  Hz), 7.434 (1H, t,  $J = 6.8$  Hz), 7.254 (1H, s), 6.980 (1H, dd,  $J = 7.2$  Hz), 6.762 (1H, s), 4.614 (1H, t,  $J = 6.4$  Hz), 3.899 (3H, s), 3.684-3.524 (2H, m), 2.394 (3H, s), 2.087 (3H, s).  $^{13}\text{C-NMR}$  ( $\text{DMSO-d}_6$ , 100 MHz)  $\delta$  (ppm): 196.95, 165.54, 164.32, 142.29, 141.00, 140.89, 135.94, 133.85, 133.60, 133.24, 132.19, 130.89, 130.73, 129.83, 129.77, 129.53, 127.47, 127.24, 127.22, 52.51, 44.42, 19.43, 18.70. HRMS (ESI-TOF,  $[\text{M}+\text{Na}]^+$ ): Calcd. for  $\text{C}_{26}\text{H}_{23}\text{NNaO}_4^+$ : 436.1519. Found: 436.1502. Anal. Calcd. for  $\text{C}_{26}\text{H}_{23}\text{NO}_4+0.3 \text{H}_2\text{O}$ : C, 74.55; H, 5.68; N, 3.34. Found: C, 74.43; H, 5.80; N, 3.35.

### Sequential aromatic acylation-amidation reaction **35** (Table 2, Entry 3)

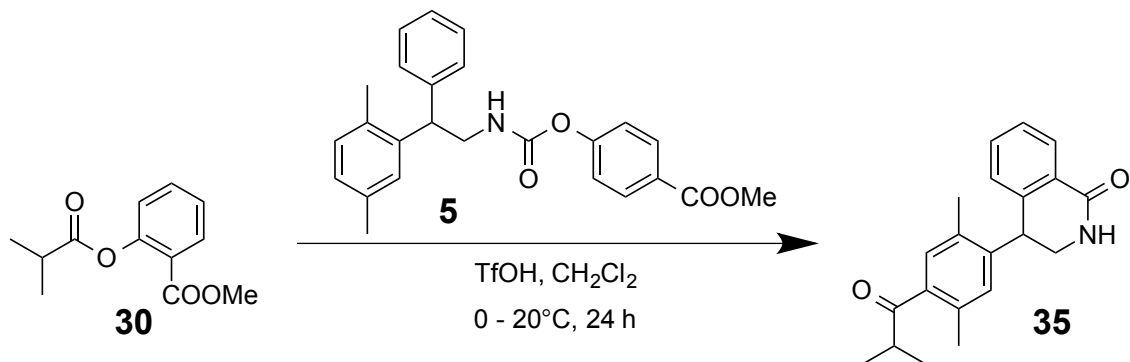

To TfOH (1.0 mL), methyl 4-(((2-(2,5-dimethylphenyl)-2-phenylethyl)carbamoyl)oxy)benzoate **5** (221.9 mg, 0.50 mmol) was added at 0°C. Then, methyl 2-(isobutyryloxy)benzoate **30** (115.7 mg, 0.52 mmol) in CH<sub>2</sub>Cl<sub>2</sub> (1.0 mL) was added at 0°C. The whole was warmed up from 0°C to 20°C, and stirred for 24 hours. After the reaction completed, the whole was poured into ice-water. Added 2M aqueous solution of NaOH (40 mL), and this reaction mixture was extracted with CH<sub>2</sub>Cl<sub>2</sub> (40 mL x 3). The organic phase was washed with brine (40 mL), dried over Na<sub>2</sub>SO<sub>4</sub>, and the solvent was evaporated under reduced pressure to give a residue, which was column-chromatographed on silica-gel (eluent: EtOAc / n-Hexane = 2 / 1) to afford 4-(4-isobutyryl-2,5-dimethylphenyl)-3,4-dihydroisoquinolin-1(2H)-one **35** (117.9 mg, 0.37 mmol, 73%) as a colorless solid. Mp. 198.1-199.7°C (colorless needle, recrystallized from CH<sub>2</sub>Cl<sub>2</sub>/n-Hexane). <sup>1</sup>H-NMR (CDCl<sub>3</sub>, 400 MHz) δ (ppm): 8.173-8.139 (1H, m), 7.437-7.371 (3H, m), 7.101 (1H, brs), 6.867-6.835 (2H, m), 4.604 (1H, t, *J* = 7.6 Hz), 3.717 (2H, dd, *J* = 6.4, 2.8 Hz), 3.394-3.325 (1H, m), 2.411 (3H, s), 2.284 (3H, s), 1.194-1.169 (6H, m). <sup>13</sup>C-NMR (CDCl<sub>3</sub>, 100 MHz) δ (ppm): 209.50, 166.91, 141.67, 141.48, 138.23, 135.89, 134.06, 133.09, 132.15, 130.38, 129.80, 128.71, 127.96, 127.81, 46.27, 40.72, 39.25, 20.89, 19.89, 19.14, 19.12. HRMS (ESI-TOF, [M+Na]<sup>+</sup>): Calcd. for C<sub>21</sub>H<sub>23</sub>NNaO<sub>2</sub><sup>+</sup>: 344.1626. Found: 344.1623. Anal. Calcd. for C<sub>21</sub>H<sub>23</sub>NO<sub>2</sub>+0.05 CH<sub>2</sub>Cl<sub>2</sub>: C, 77.64; H, 7.15; N, 4.30. Found: C, 77.62; H, 7.27; N, 4.33.

### Sequential aromatic acylation-amidation reaction **38** (Table 2, Entry 4)

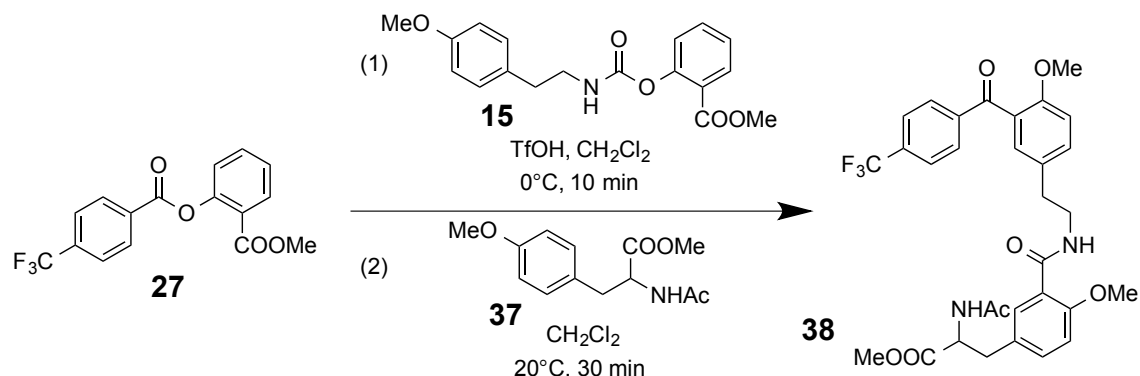

To TfOH (2.0 mL), methyl 2-(((4-methoxyphenethyl)carbamoyl)oxy)benzoate **15** (333.4 mg, 1.01 mmol) in CH<sub>2</sub>Cl<sub>2</sub> (2.0 mL) was added at 0°C. Then, methyl 2-((4-(trifluoromethyl)benzoyl)oxy)benzoate **27** (332.1 mg, 1.02 mmol) was added at 0°C. The whole was stirred for 10 minutes. Then, methyl 2-acetamido-3-(4-methoxyphenyl)propanoate **37** (506.4 mg, 2.02 mmol) in CH<sub>2</sub>Cl<sub>2</sub> (2.0 mL) was added at 0°C. The whole was warmed up from 0°C to 20°C, and stirred for 30 minutes. After the reaction completed, the whole was poured into ice-water. This reaction mixture was extracted with CH<sub>2</sub>Cl<sub>2</sub> (40 mL x 3). The organic phase was washed with brine (40 mL), dried over Na<sub>2</sub>SO<sub>4</sub>, and the solvent was evaporated under reduced pressure to give a residue, which was column-chromatographed on silica-gel (eluent: EtOAc) to afford methyl 2-acetamido-3-(4-methoxy-3-((4-methoxy-3-(4-(trifluoromethyl)benzoyl)phenethyl)carbamoyl)phenyl)propanoate **38** (358.6 mg, 0.60 mmol, 60 %) as a colorless amorphous material. <sup>1</sup>H-NMR (CDCl<sub>3</sub>, 400 MHz) δ (ppm): 7.954-7.939 (2H, m), 7.863 (2H, d, *J* = 8.4 Hz), 7.654 (2H, d, *J* = 8.4 Hz), 7.420 (1H, dd, *J* = 8.6, 2.0 Hz), 7.305 (1H, d, *J* = 2.0 Hz), 7.208 (1H, dd, *J* = 8.4, 2.0 Hz), 6.980 (1H, d, *J* = 8.8 Hz), 6.868 (1H, d, *J* = 8.4 Hz), 6.454 (1H, d, *J* = 8.0 Hz), 4.854 (1H, q, *J* = 5.6 Hz), 3.814 (3H, s), 3.743-3.685 (8H, m), 3.079 (2H, ddd, *J* = 14.0, 6.4, 6.4 Hz), 2.920 (2H, t, *J* = 7.2 Hz), 2.634 (1H, brs), 1.974 (3H, s). <sup>13</sup>C-NMR (CDCl<sub>3</sub>, 100 MHz) δ (ppm): 195.84, 172.55, 170.46, 165.56, 157.03, 156.72, 141.28, 134.38 (q, *J* = 33 Hz), 133.90, 133.56, 133.33, 132.16, 130.58, 130.25, 129.37, 128.33, 125.69 (q, *J* = 3 Hz), 124.17 (q, *J* = 270 Hz), 121.59, 112.33, 112.11, 56.36, 56.13, 53.74, 52.89, 41.40, 37.29, 35.08, 23.46. HRMS (ESI-TOF, [M+Na]<sup>+</sup>): Calcd. for C<sub>31</sub>H<sub>31</sub>N<sub>2</sub>F<sub>3</sub>NaO<sub>7</sub><sup>+</sup>: 623.1981. Found: 623.1973. Anal. Calcd. for C<sub>31</sub>H<sub>31</sub>N<sub>2</sub>F<sub>3</sub>O<sub>7</sub>+0.6 H<sub>2</sub>O: C, 60.90; H, 5.31; N, 4.58. Found: C, 60.67; H, 5.45; N, 4.34.

**Sequential aromatic acylation-amidation reaction 41 (Table 2, Entry 5)**

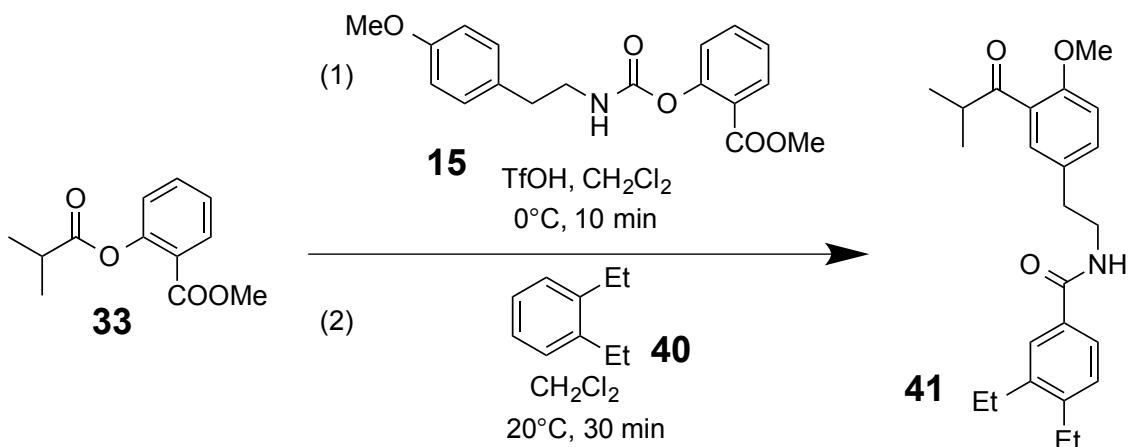

To  $\text{TfOH}$  (2.0 mL), methyl 2-(((4-methoxyphenethyl)carbamoyl)oxy)benzoate **15** (335.2 mg, 1.02 mmol) was added at  $0^\circ\text{C}$ . Then, methyl 2-(isobutyryloxy)benzoate **33** (228.6 mg, 1.03 mmol) in  $\text{CH}_2\text{Cl}_2$  (2.0 mL) was added at  $0^\circ\text{C}$ . The whole was stirred for 10 minutes. Then, 1,2-diethylbenzene **40** (273.7 mg, 2.04 mmol) in  $\text{CH}_2\text{Cl}_2$  (2.0 mL) was added at  $0^\circ\text{C}$ . The whole was warmed up from  $0^\circ\text{C}$  to  $20^\circ\text{C}$ , and stirred for 30 minutes. After the reaction completed, the whole was poured into ice-water. This reaction mixture was extracted with  $\text{CH}_2\text{Cl}_2$  (40 mL x 3). The organic phase was washed with brine (40 mL), dried over  $\text{Na}_2\text{SO}_4$ , and the solvent was evaporated under reduced pressure to give a residue, which was column-chromatographed on silica-gel (eluent:  $\text{EtOAc} / \text{n-Hexane} = 1 / 2$ ) to afford 3,4-diethyl-*N*-(3-isobutyryl-4-methoxyphenethyl)- benzamide **41** (299.7 mg, 0.79 mmol, 77%) as a colorless oil.

$^1\text{H-NMR}$  ( $\text{CDCl}_3$ , 400 MHz)  $\delta$  (ppm): 7.571 (1H, d,  $J = 2.0$  Hz), 7.449 (1H, t,  $J = 7.8$  Hz), 7.375 (1H, t,  $J = 2.4$  Hz), 7.294 (1H, d,  $J = 8.6$  Hz), 7.173 (1H, d,  $J = 8.0$  Hz), 6.893 (1H, d,  $J = 8.4$  Hz), 6.334 (1H, t,  $J = 5.6$  Hz), 3.855 (3H, s), 3.659 (2H,  $J = 6.8$  Hz), 3.464 (1H, sep,  $J = 6.8$  Hz), 2.877 (2H, t,  $J = 6.8$  Hz), 2.667 (4H, qt,  $J = 7.4, 0.8$  Hz), 1.214 (6H, qd,  $J = 7.4, 2.0$  Hz), 1.128 (6H, d,  $J = 6.8$  Hz).  $^{13}\text{C-NMR}$  ( $\text{CDCl}_3$ , 100 MHz)  $\delta$  (ppm): 208.70, 168.28, 156.96, 146.09, 142.63, 133.42, 132.69, 131.72, 130.58, 129.54, 128.94, 127.64, 124.69, 112.26, 56.17, 41.59, 40.57, 35.21, 25.99, 25.95, 19.06, 15.65, 15.56. HRMS (ESI-TOF,  $[\text{M}+\text{Na}]^+$ ): Calcd. for  $\text{C}_{24}\text{H}_{31}\text{NNO}_3^+$ : 404.2196. Found: 404.2192. Anal. Calcd. for  $\text{C}_{24}\text{H}_{31}\text{NO}_3+0.2 \text{H}_2\text{O}$ : C, 74.85; H, 8.22; N, 3.64. Found: C, 74.89; H, 8.14; N, 3.56.



**Formation of three bonds in a one-pot reaction **43** (Figure 8, Reaction (a))**

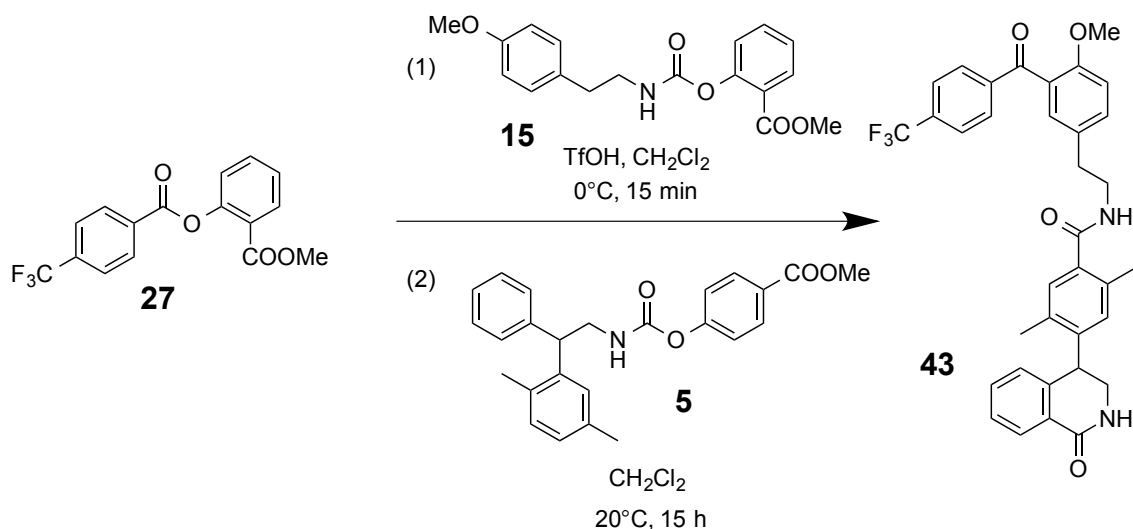

To TfOH (2.0 mL), methyl 2-(((4-methoxyphenethyl)carbamoyl)oxy)benzoate **15** (166.1 mg, 0.50 mmol) was added at 0°C. Then, methyl 2-((4-(trifluoromethyl)benzoyl)oxy)benzoate **27** (164.0 mg, 0.51 mmol) was added at 0°C. The whole was stirred for 15 minutes. Then, methyl 4-(((2-(2,5-dimethylphenyl)-2-phenylethyl)carbamoyl)oxy)benzoate **5** (230.3 mg, 0.52 mmol) in CH<sub>2</sub>Cl<sub>2</sub> (2.0 mL) was added at 0°C. The whole was warmed up from 0°C to 20°C, and stirred for 15 hours. After the reaction completed, the whole was poured into ice-water and added 2M aqueous solution of NaOH (30 mL). This reaction mixture was extracted with CH<sub>2</sub>Cl<sub>2</sub> (40 mL x 3). The organic phase was washed with brine (40 mL), dried over Na<sub>2</sub>SO<sub>4</sub>, and the solvent was evaporated under reduced pressure to give a residue, which was column-chromatographed on silica-gel (eluent: EtOAc) to afford *N*-(4-methoxy-3-(4-(trifluoromethyl)benzoyl)phenethyl)-2,5-dimethyl-4-(1-oxo-1,2,3,4-tetrahydroisoquinolin-4-yl)benzamide **43** (172.7 mg, 0.29 mmol, 56%) as amorphous material. <sup>1</sup>H-NMR (CDCl<sub>3</sub>, 400 MHz) δ (ppm): 8.143-8.120 (1H, m), 7.869 (2H, d, *J* = 8.0 Hz), 7.673 (2H, d, *J* = 8.4 Hz), 7.424-7.373 (3H, m), 7.301 (1H, d, *J* = 2.4 Hz), 7.183 (1H, s), 6.961 (1H, d, *J* = 8.4 Hz), 6.818-6.796 (1H, m), 6.747 (1H, s), 6.608 (1H, brs), 5.956 (1H, t, *J* = 6.0 Hz), 4.546 (1H, t, *J* = 7.6 Hz), 3.725-3.630 (7H, m), 2.934 (2H, t, *J* = 7.6 Hz), 2.327 (3H, s), 2.232 (3H, s). <sup>13</sup>C-NMR (CDCl<sub>3</sub>, 100 MHz) δ (ppm): 195.93, 170.41, 166.80, 156.86, 141.69, 141.30, 140.66, 135.88, 134.54 (q, *J* = 28 Hz), 134.37, 134.31, 133.62, 133.15, 131.79, 131.52, 131.02, 130.70, 130.35, 129.73, 128.72, 128.56, 127.97, 127.84, 125.79 (q, *J* = 3 Hz), 124.24 (q, *J* = 271 Hz), 112.43, 56.20, 46.31, 41.38, 40.56, 35.25, 19.94, 19.67. HRMS (ESI-TOF, [M+Na]<sup>+</sup>): Calcd. for C<sub>35</sub>H<sub>31</sub>F<sub>3</sub>N<sub>2</sub>NaO<sub>4</sub><sup>+</sup>: 623.2128. Found: 623.2128. Anal. Calcd. for C<sub>35</sub>H<sub>31</sub>F<sub>3</sub>N<sub>2</sub>O<sub>4</sub>+0.5

CH<sub>2</sub>Cl<sub>2</sub>: C, 66.30; H, 5.02; N, 4.36. Found: C, 66.05; H, 5.33; N, 4.35.

**Formation of three bonds in a one-pot reaction **45** (Figure 8, Reaction (b))**

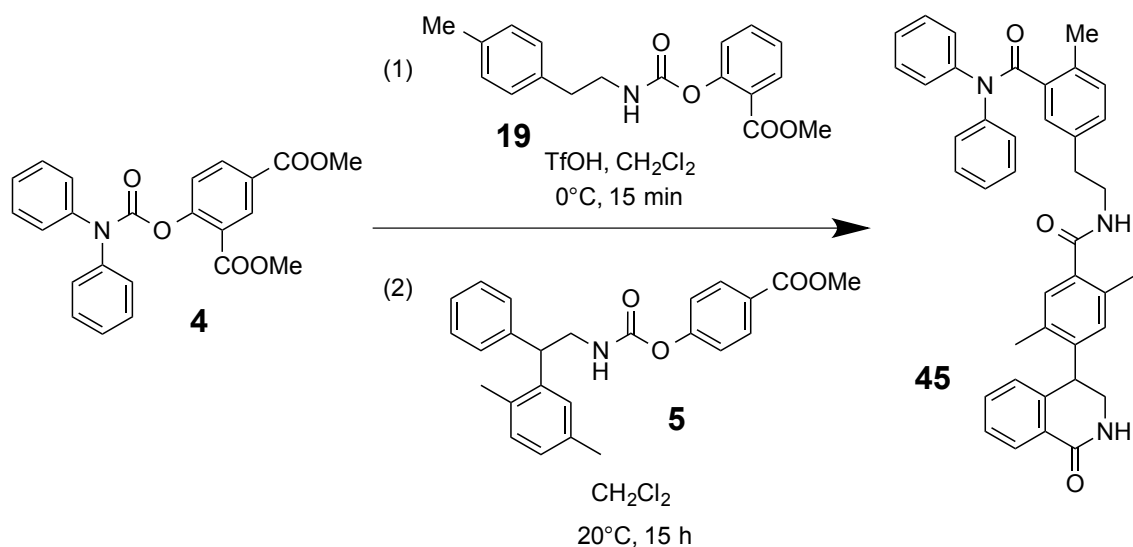

To TfOH (3.0 mL), methyl 2-(((4-methylphenethyl)carbamoyl)oxy)benzoate **19** (161.0 mg, 0.51 mmol) was added at 0°C. Then, dimethyl 4-((diphenylcarbamoyl)oxy)isophthalate **4** (203.7 mg, 0.50 mmol) was added at 0°C. The whole was stirred for 15 minutes. Then, methyl 4-(((2-(2,5-dimethylphenyl)-2-phenylethyl)carbamoyl)oxy)benzoate **5** (227.4 mg, 0.56 mmol) in CH<sub>2</sub>Cl<sub>2</sub> (2.0 mL) was added at 0°C. The whole was warmed up from 0°C to 20°C, and stirred for 15 hours. After the reaction completed, the whole was poured into ice-water and added 2M aqueous solution of NaOH (30 mL). This reaction mixture was extracted with CH<sub>2</sub>Cl<sub>2</sub> (40 mL x 3). The organic phase was washed with brine (40 mL), dried over Na<sub>2</sub>SO<sub>4</sub>, and the solvent was evaporated under reduced pressure to give a residue, which was column-chromatographed on silica-gel (eluent: EtOAc) to afford *N*-(3-(diphenylcarbamoyl)-4-methylphenethyl)-2,5-dimethyl-4-(1-oxo-1,2,3,4-tetrahydroisoquinolin-4-yl)benzamide **45** (160.3 mg, 0.26 mmol, 53%) as a colorless amorphous material. <sup>1</sup>H-NMR (CDCl<sub>3</sub>, 400 MHz) δ (ppm): 8.153-8.112 (1H, m), 7.394-6.969 (16H, m), 6.831-6.796 (2H, m), 6.760 (1H, brs), 5.617 (1H, t, *J* = 6.0 Hz), 4.550 (1H, t, *J* = 7.2 Hz), 3.634 (2H, dd, *J* = 7.8, 2.8 Hz), 3.485 (2H, q, *J* = 6.4 Hz), 2.749 (2H, t, *J* = 6.8 Hz), 2.413 (3H, s), 2.342 (3H, s), 2.220 (3H, s). <sup>13</sup>C-NMR (CDCl<sub>3</sub>, 100 MHz) δ (ppm): 171.30, 170.26, 166.74, 143.50, 141.70, 140.60, 137.20, 136.24, 135.94, 134.36, 134.28, 134.22, 133.08, 131.44, 131.29, 130.33, 129.77, 129.65, 129.49, 128.67, 128.61, 127.91, 127.77, 127.05, 46.28, 41.12, 40.54, 35.31, 19.97, 19.81, 19.69. HRMS (ESI-TOF, [M+Na]<sup>+</sup>): Calcd. for C<sub>40</sub>H<sub>37</sub>N<sub>3</sub>NaO<sub>3</sub><sup>+</sup>: 630.2727. Found: 630.2731. Anal. Calcd. for C<sub>40</sub>H<sub>37</sub>N<sub>3</sub>O<sub>3</sub>+0.6 CH<sub>2</sub>Cl<sub>2</sub>: C, 74.03; H, 5.85; N, 6.38. Found: C, 74.06; H, 6.07; N, 6.18.

## V. NMR spectra

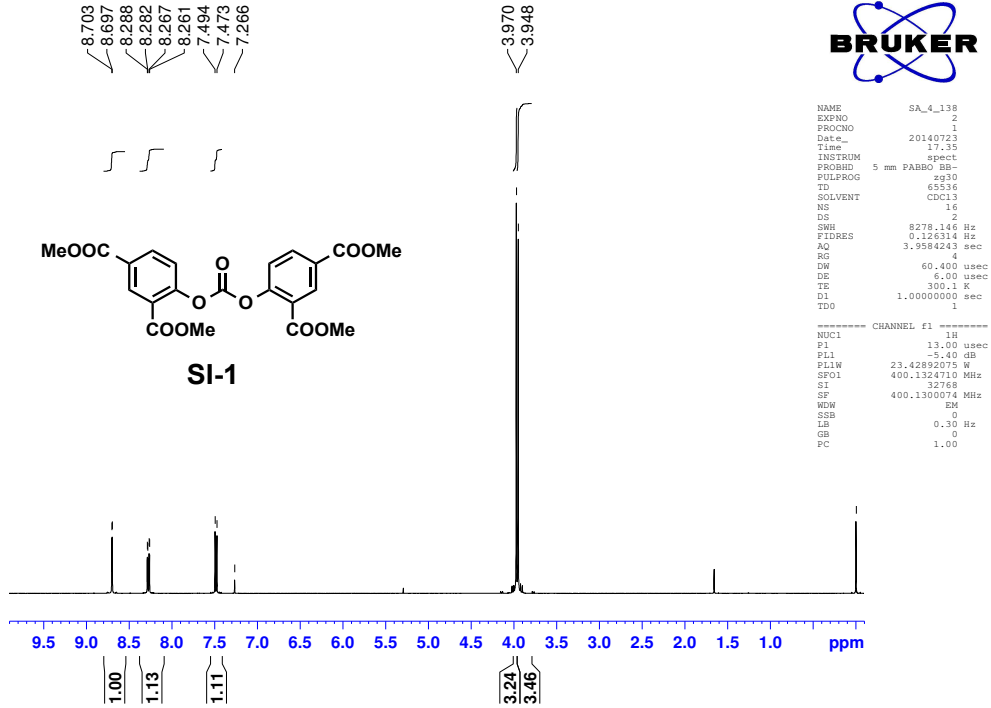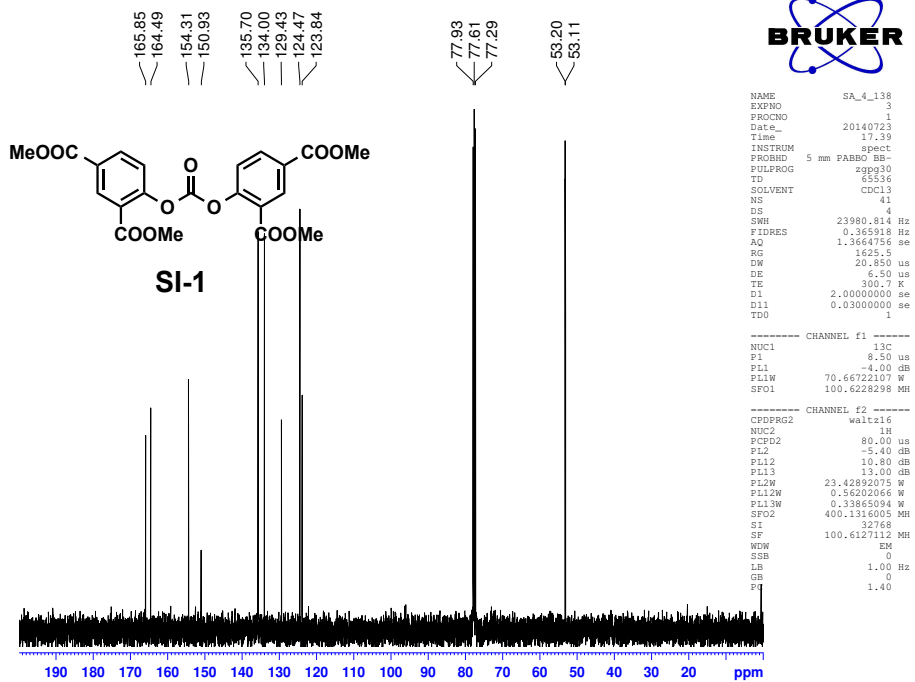

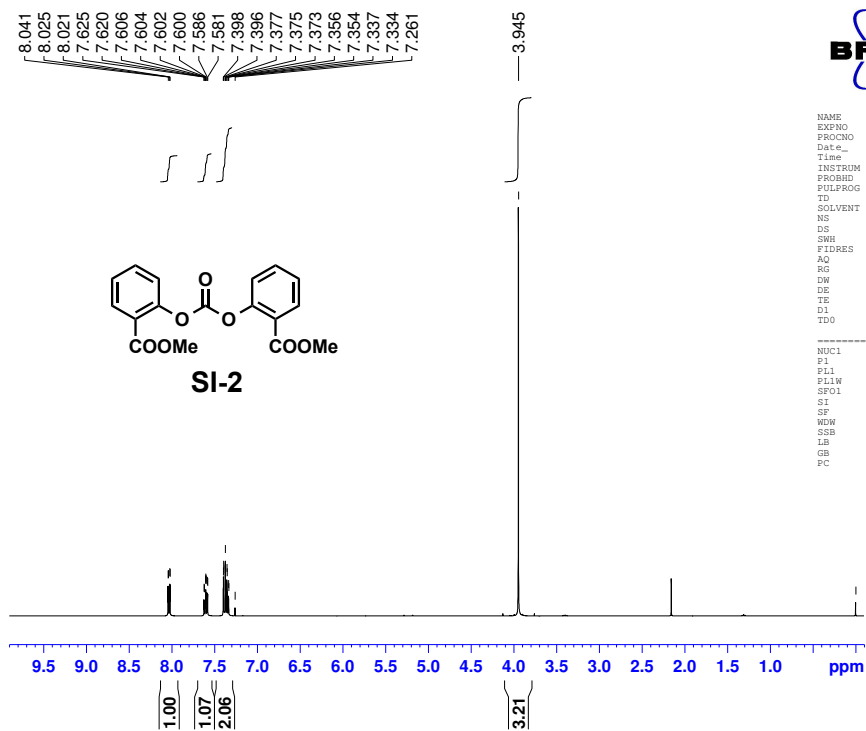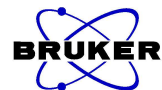

```

NAME      Feb27-2013
EXPNO    4
PROCNO   1
Date_    20130227
Time     11.07
INSTRUM  spect
PROBHD   5 mm PABBO BB-
PULPROG  zg30
TD        65536
SOLVENT  CDCl3
NS        16
DS        2
SWH       8278.146 Hz
FIDRES   0.126314 Hz
AQ        3.9584243 sec
RG         57
DW        60.400 usec
DE         5.00 usec
TE        296.2 K
D1        1.00000000 sec
TDO
----- CHANNEL f1 -----
NUC1      1H
P1        13.00 usec
PL1       -5.40 dB
PL1W      23.42892075 W
SFO1      400.1324710 MHz
SI         32768
SF        400.1300090 MHz
WDW       EM
SSB        0
LB         0.30 Hz
GB         0
PC         1.00

```

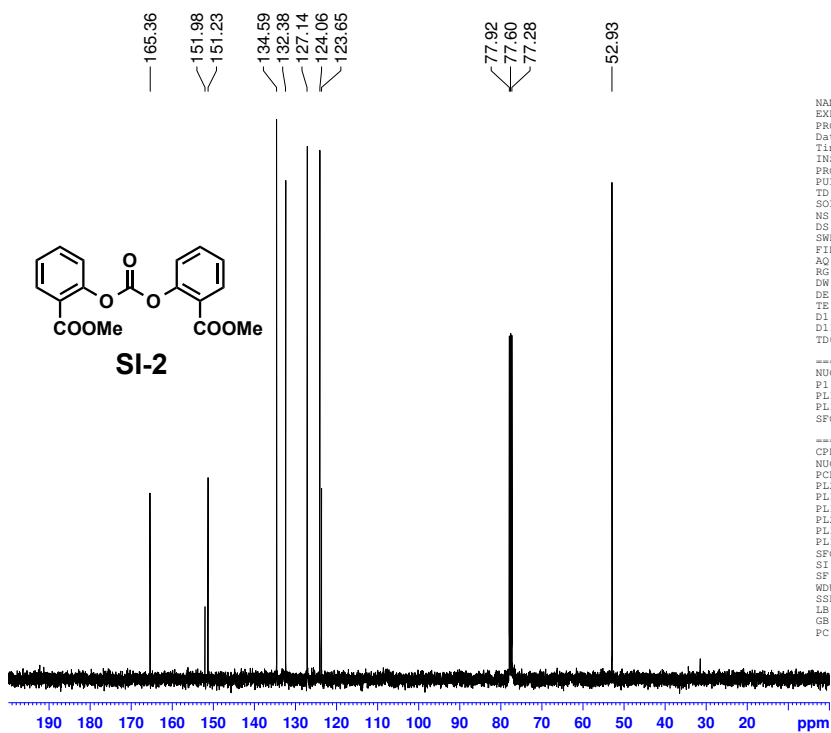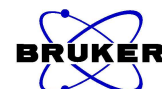

```

NAME      Feb27-2013
EXPNO    3
PROCNO   1
Date_    20130227
Time     11.03
INSTRUM  spect
PROBHD   5 mm PABBO BB-
PULPROG  zgpg30
TD        65536
SOLVENT  CDCl3
NS        97
DS        4
SWH       26178.010 Hz
FIDRES   0.399445 Hz
AQ        1.2517875 se
RG        2298.8
DW        19.100 us
DE         6.50 us
TE        296.2 K
D1        2.00000000 se
D11       0.03000000 se
TDO       1
----- CHANNEL f1 -----
NUC1      13C
P1         8.50 us
PL1       -4.00 dB
PL1W      70.66722107 W
SFO1      100.6228298 MH
----- CHANNEL f2 -----
CPDPRG2  waltz16
NUC2      1H
PCPD2     80.00 us
PL2       -5.40 dB
PL12     10.80 dB
PL13     13.00 dB
PL1W      23.42892075 W
PL12W     0.56202065 W
PL13W     0.33865094 W
SFO2      400.1316005 MH
SI         32768
SF        100.6127146 MH
WDW       EM
SSB        0
LB         1.00 Hz
GB         0
PC         1.40

```

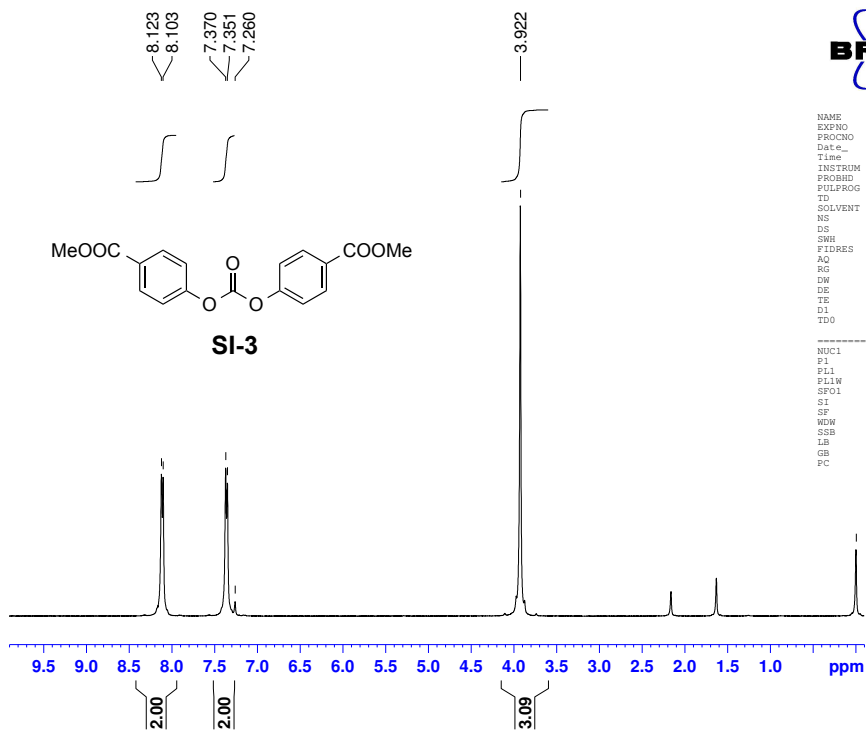

```

NAME      SA_4_162
EXPNO    1
PROCNO   1
Date_    20140803
Time     13.49
INSTRUM  spect
PROBHD   5 mm PABBO BB-
PULPROG  zg30
TD        65536
SOLVENT  CDCl3
NS        16
DS        2
SWH       8278.146 Hz
FIDRES   0.126314 Hz
AQ        3.9584243 sec
RG         4
DW        60.400 usec
DE        6.00 usec
TE        300.0 K
D1        1.00000000 sec
TDO
----- CHANNEL f1 -----
NUC1      1H
P1         13.00 usec
PL1        -5.40 dB
PL1W      23.42892075 W
SFO1      400.1324710 MHz
SI         32768
SF         400.1300101 MHz
WDW        EM
SSB         0
LB         0.30 Hz
GB         0
PC         1.00

```

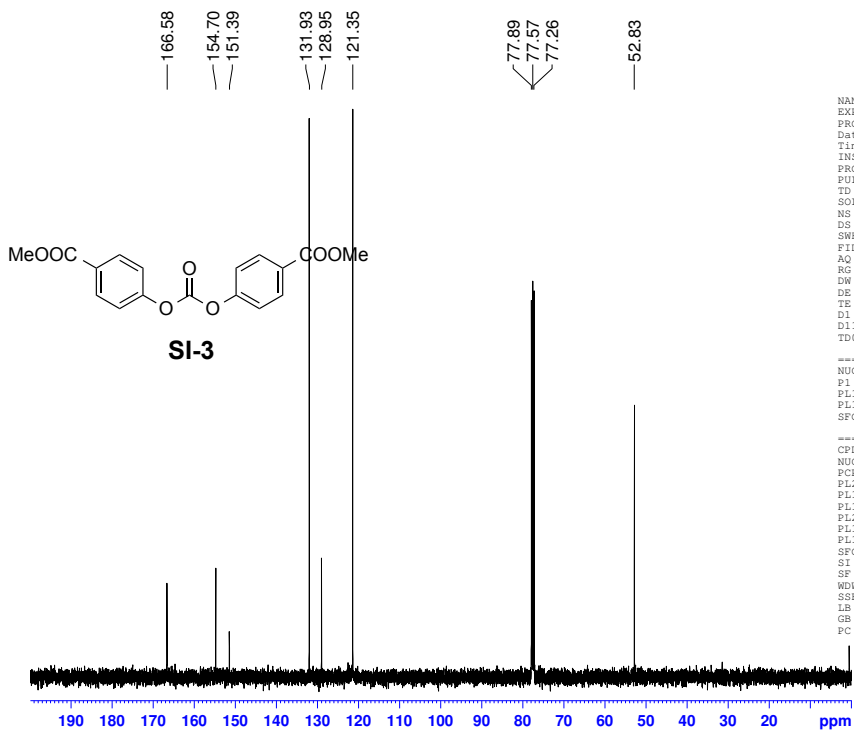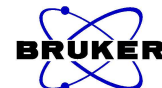

```

NAME      SA_4_162
EXPNO    2
PROCNO   1
Date_    20140803
Time     13.59
INSTRUM  spect
PROBHD   5 mm PABBO BB-
PULPROG  zgpg30
TD        65536
SOLVENT  CDCl3
NS        137
DS        4
SWH       23980.814 Hz
FIDRES   0.365918 Hz
AQ        1.3664756 se
RG         4
DW        20.850 us
DE        6.50 us
TE        300.8 K
D1        2.00000000 se
D11       0.03000000 se
TDO        1
----- CHANNEL f1 -----
NUC1      13C
P1         8.50 us
PL1        -4.00 dB
PL1W      70.66722107 W
SFO1      100.6228298 MH
----- CHANNEL f2 -----
CPDPRG2  waltz16
NUC2      1H
PCPD2     80.00 us
PL2        -5.40 dB
PL12      10.80 dB
PL13      13.00 dB
PL1W      23.42892075 W
PL12W     0.56202065 W
PL13W     0.33865094 W
SFO2      400.1316005 MH
SI         32768
SF         100.6127141 MH
WDW        EM
SSB         0
LB         1.00 Hz
GB         0
PC         1.40

```

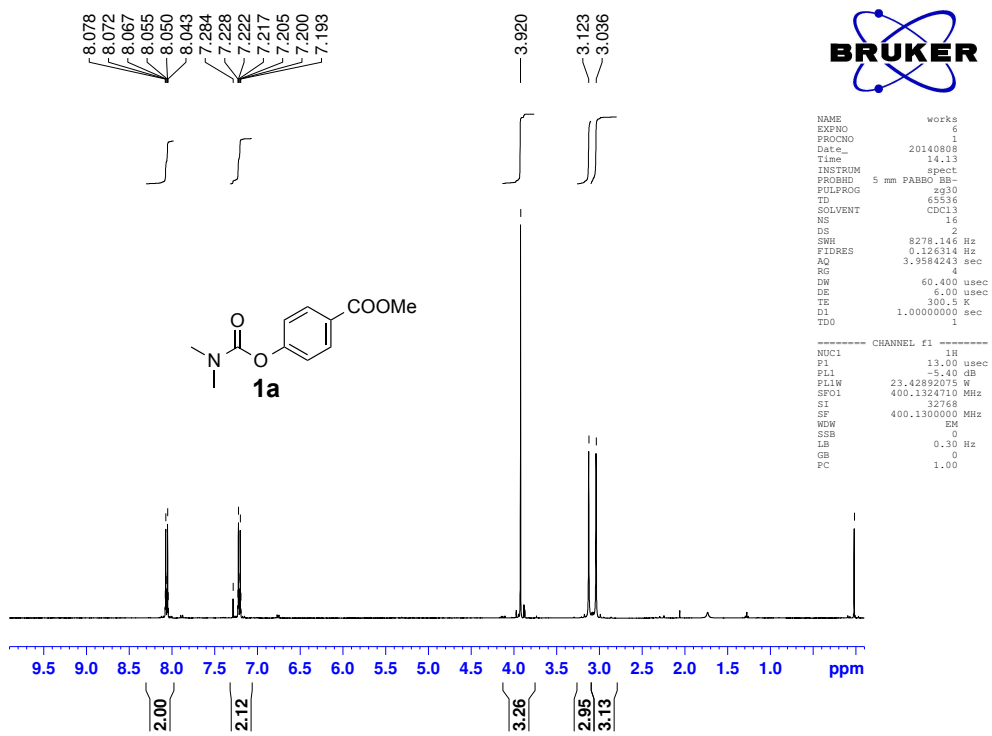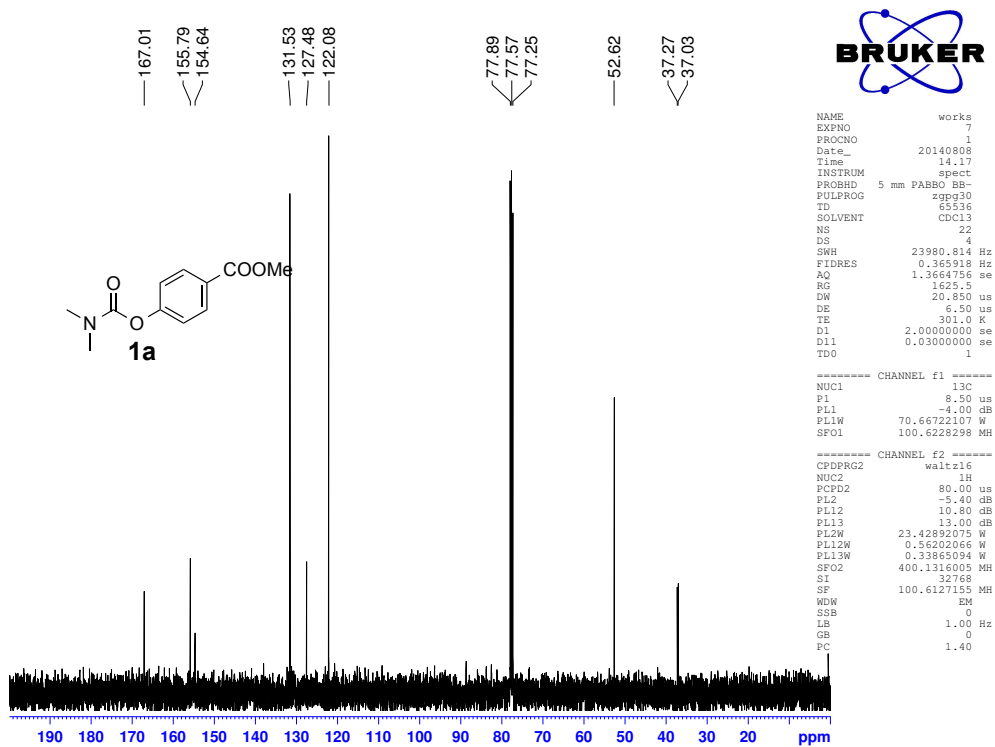

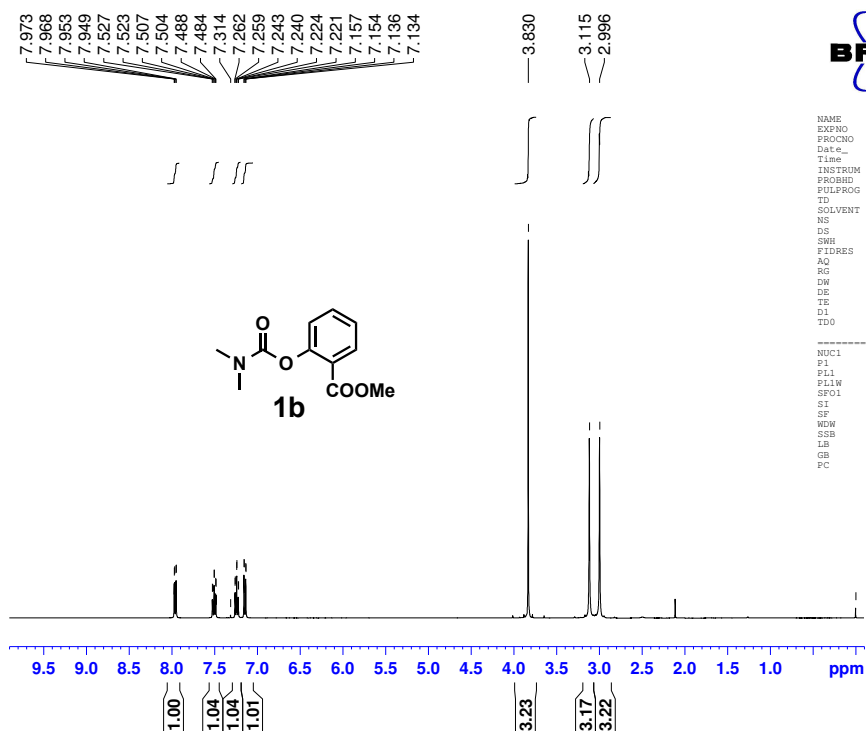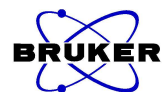

```

NAME SA_3_069
EXPNO 1
PROCNO 1
Date_ 20131209
Time 19.31
INSTRUM spect
PROBHD 5 mm PABBO BB-
PULPROG zg30
TD 65536
SOLVENT CDCl3
NS 16
DS 2
SWH 8278.146 Hz
FIDRES 0.126314 Hz
AQ 3.9584243 sec
RG 4
DW 60.400 usec
DE 6.00 usec
TE 296.8 K
D1 1.00000000 sec
TDO

----- CHANNEL f1 -----
NUC1 1H
P1 13.00 usec
PL1 -5.40 dB
PL1W 23.42892075 W
SFO1 400.1324710 MHz
SI 32768
SF 400.1299878 MHz
WDW EM
SSB 0
LB 0.30 Hz
GB 0
PC 1.00

```

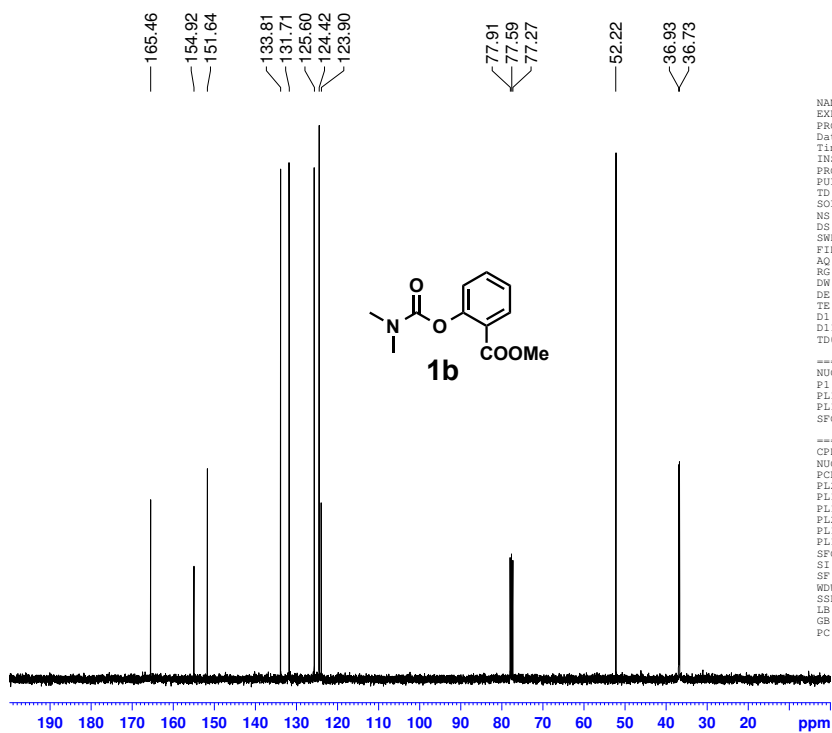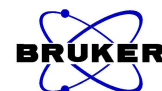

```

NAME SA_3_069
EXPNO 2
PROCNO 1
Date_ 20131209
Time 19.34
INSTRUM spect
PROBHD 5 mm PABBO BB-
PULPROG zgpg30
TD 65536
SOLVENT CDCl3
NS 22
DS 4
SWH 23980.814 Hz
FIDRES 0.365918 Hz
AQ 1.3664756 se
RG 1149.4
DW 20.850 us
DE 6.50 us
TE 297.3 K
D1 2.00000000 se
D11 0.03000000 se
TDO 1

----- CHANNEL f1 -----
NUC1 13C
P1 8.50 us
PL1 -4.00 dB
PL1W 70.66722107 W
SFO1 100.6228298 MH

----- CHANNEL f2 -----
CPDPRG2 waltz16
NUC2 1H
PCPD2 80.00 us
PL2 -5.40 dB
PL12 10.80 dB
PL13 13.00 dB
PL2W 23.42892075 W
PL12W 0.56202066 W
PL13W 0.33865094 W
SFO2 400.1316005 MH
SI 32768
SF 100.6127418 MH
WDW EM
SSB 0
LB 1.00 Hz
GB 0
PC 1.40

```

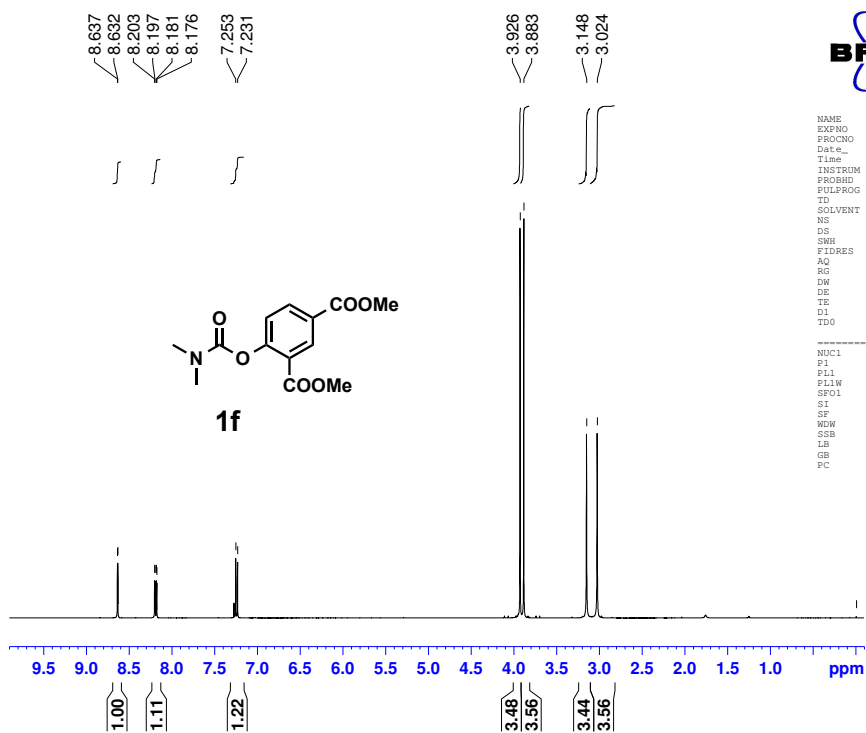

```

NAME SA_4_159
EXPNO 1
PROCNO 1
Date_ 20150827
Time 21.35
INSTRUM spect
PROBHD 5 mm PABBO BB-
PULPROG zg30
TD 65536
SOLVENT CDCl3
NS 16
DS 2
SWH 8278.146 Hz
FIDRES 0.126314 Hz
AQ 3.9584243 sec
RG 40.3
DW 60.400 usec
DE 6.00 usec
TE 297.2 K
D1 1.00000000 sec
TDO

----- CHANNEL f1 -----
NUC1 1H
P1 13.00 usec
PL1 -5.40 dB
PL1W 23.42892075 W
SF01 400.1324710 MHz
SI 32768
SF 400.1300047 MHz
WDW EM
SSB 0
LB 0.30 Hz
GB 0
PC 1.00

```

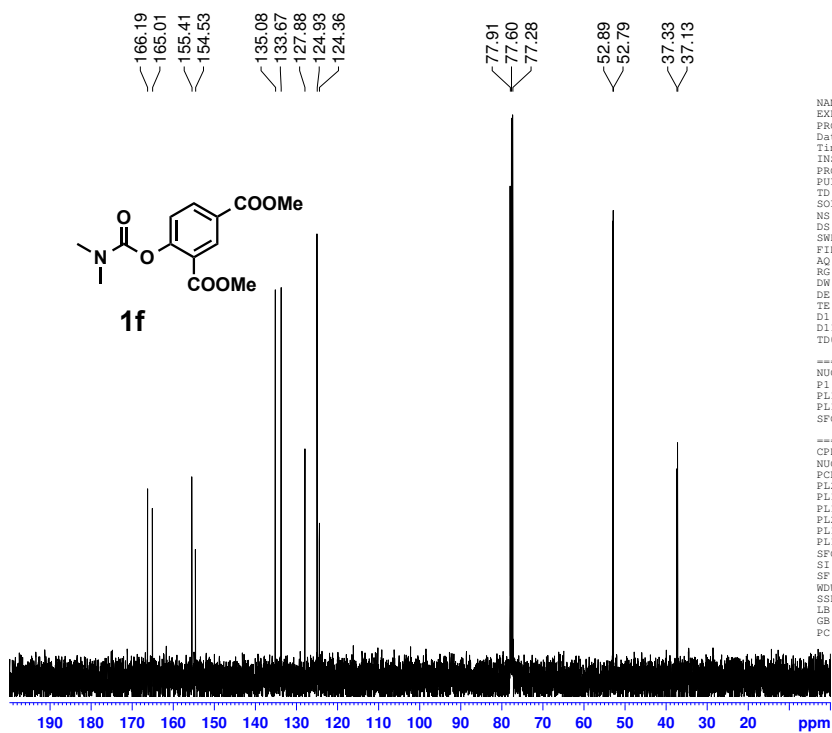

```

NAME SA_4_159
EXPNO 2
PROCNO 1
Date_ 20150827
Time 21.38
INSTRUM spect
PROBHD 5 mm PABBO BB-
PULPROG zgpg30
TD 65536
SOLVENT CDCl3
NS 18
DS 4
SWH 23980.814 Hz
FIDRES 0.365918 Hz
AQ 1.3664756 se
RG 812.7
DW 20.650 us
DE 6.50 us
TE 297.7 K
D1 2.00000000 se
D11 0.03000000 se
TDO 1

----- CHANNEL f1 -----
NUC1 13C
P1 8.50 us
PL1 -4.00 dB
PL1W 70.66722107 W
SF01 100.6228298 MH

----- CHANNEL f2 -----
CPDPRG2 waltz16
NUC2 1H
PCPD2 80.00 us
PL2 -5.40 dB
PL12 10.80 dB
PL13 13.00 dB
PL1W 23.42892075 W
PL12W 0.56202066 W
PL13W 0.33865094 W
SF02 400.1316005 MH
SI 32768
SF 100.6127161 MH
WDW EM
SSB 0
LB 1.00 Hz
GB 0
PC 1.40

```



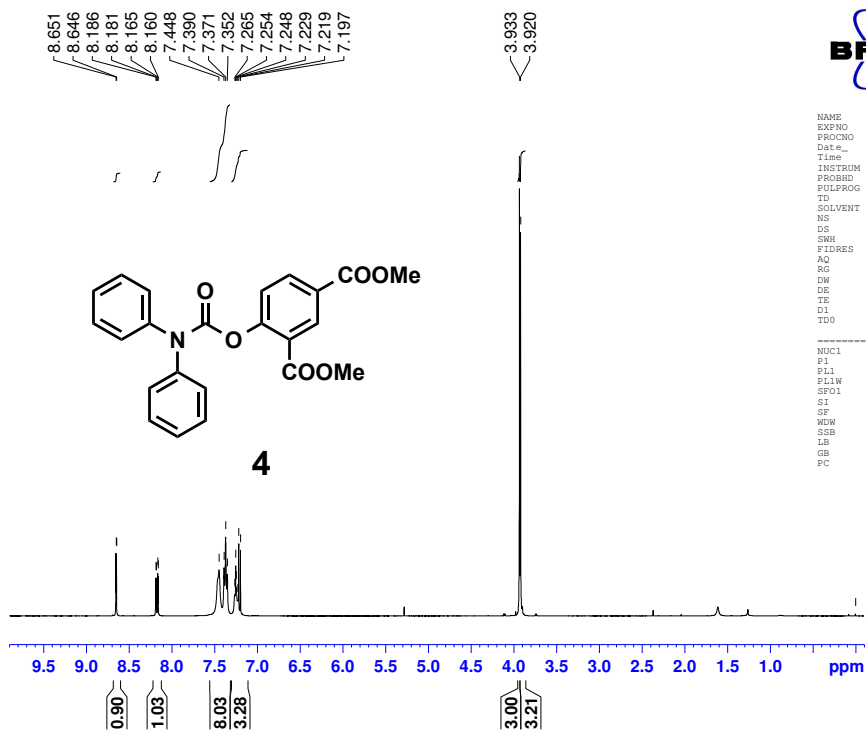

NAME SA\_6\_105  
 EXPNO 2  
 PROCNO 1  
 Date\_ 20150618  
 Time 11.04  
 INSTRUM spect  
 PROBH 5 mm PABBO BB-  
 PULPROG zg30  
 TD 65536  
 SOLVENT CDCl3  
 NS 16  
 DS 2  
 SWH 8278.146 Hz  
 FIDRES 0.126314 Hz  
 AQ 3.9584243 sec  
 RG 71.8  
 DW 60.400 usec  
 DE 6.00 usec  
 TE 298.3 K  
 D1 1.00000000 sec  
 TDO

----- CHANNEL f1 -----  
 NUC1 1H  
 P1 13.00 usec  
 PL1 -5.40 dB  
 PL1W 23.42892075 W  
 SFO1 400.1324710 MHz  
 SI 32768  
 SF 400.1300123 MHz  
 WDW EM  
 SSB 0  
 LB 0.30 Hz  
 GB 0  
 PC 1.00

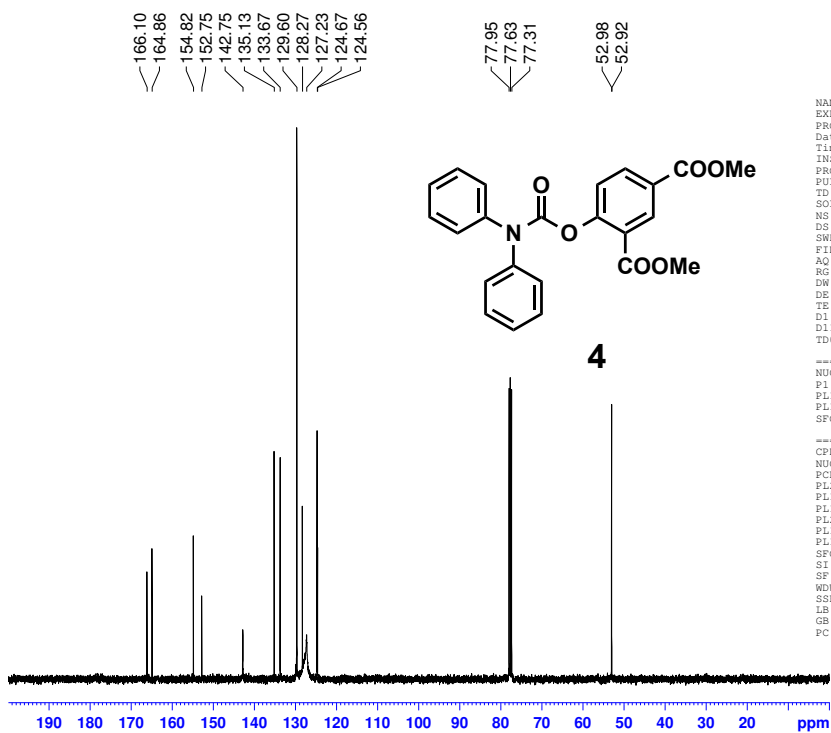

NAME SA\_6\_105  
 EXPNO 4  
 PROCNO 1  
 Date\_ 20150826  
 Time 20.34  
 INSTRUM spect  
 PROBH 5 mm PABBO BB-  
 PULPROG zgpg30  
 TD 65536  
 SOLVENT CDCl3  
 NS 182  
 DS 4  
 SWH 23980.814 Hz  
 FIDRES 0.365918 Hz  
 AQ 1.3664756 se  
 RG 1024  
 DW 20.650 us  
 DE 6.50 us  
 TE 298.4 K  
 D1 2.00000000 se  
 D11 0.03000000 se  
 TDO 1

----- CHANNEL f1 -----  
 NUC1 13C  
 P1 8.50 us  
 PL1 -4.00 dB  
 PL1W 70.66722107 W  
 SFO1 100.6228298 MH

----- CHANNEL f2 -----  
 CPDPRG2 waltz16  
 NUC2 1H  
 PCPD2 80.00 us  
 PL2 -5.40 dB  
 PL12 10.80 dB  
 PL13 13.00 dB  
 PL2W 23.42892075 W  
 PL12W 0.56202066 W  
 PL13W 0.33865094 W  
 SFO2 400.1316005 MH  
 SI 32768  
 SF 100.6127175 MH  
 WDW EM  
 SSB 0  
 LB 1.00 Hz  
 GB 0  
 PC 1.40

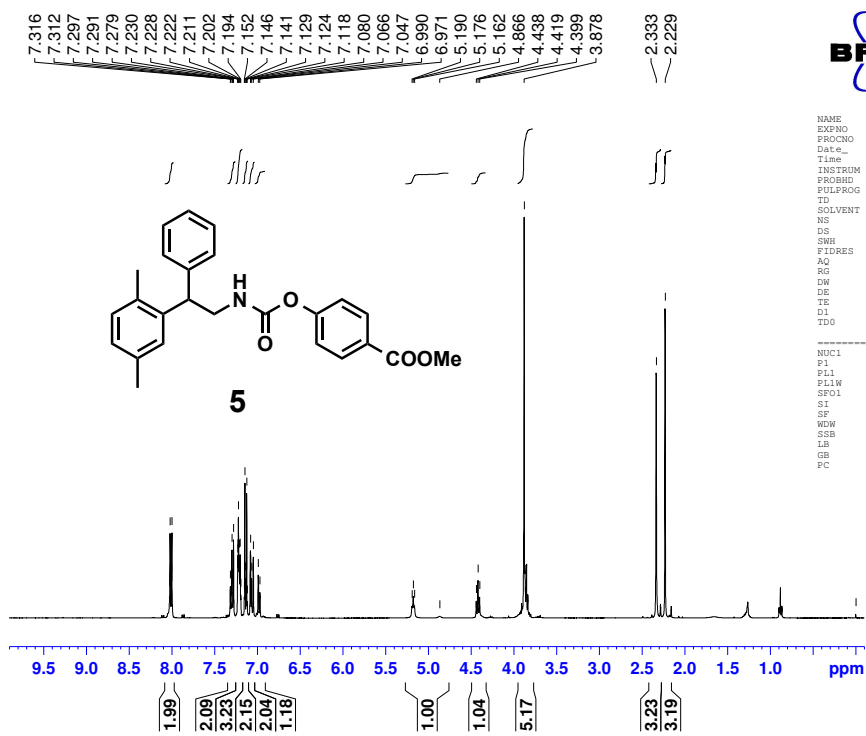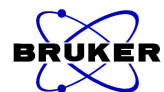

```

NAME      SA_6_062
EXPNO    2
PROCNO   1
Date_    20150417
Time     20.51
INSTRUM  spect
PROBHD   5 mm PABBO BB-
PULPROG  zg30
TD        65536
SOLVENT  CDCl3
NS        16
DS        2
SWH       8278.146 Hz
FIDRES   0.126314 Hz
AQ        3.9584243 sec
RG         35.9
DW         60.400 usec
DE         6.00 usec
TE        301.1 K
D1        1.00000000 sec
TDO
----- CHANNEL f1 -----
NUC1     1H
P1       13.00 usec
PL1      -5.40 dB
PL1W     23.42892075 W
SF01     400.1324710 MHz
SI        32768
SF        400.1300212 MHz
WDW       EM
SSB       0
LB        0.30 Hz
GB        0
PC        1.00

```

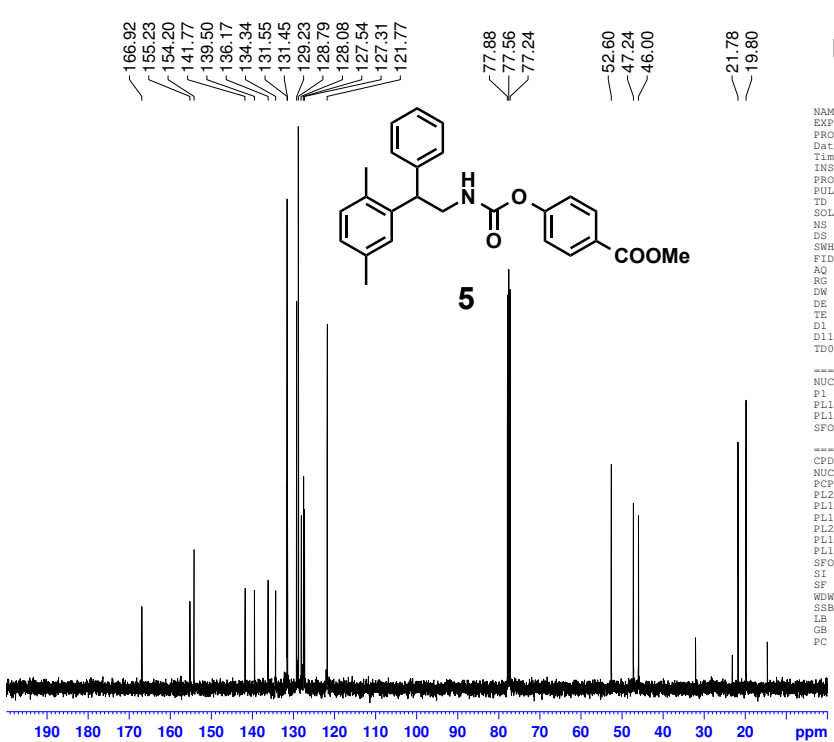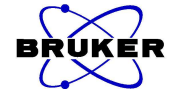

```

NAME      SA_6_062
EXPNO    3
PROCNO   1
Date_    20150417
Time     20.59
INSTRUM  spect
PROBHD   5 mm PABBO BB-
PULPROG  zgpg30
TD        65536
SOLVENT  CDCl3
NS        105
DS        4
SWH       23980.814 Hz
FIDRES   0.365918 Hz
AQ        1.3664756 se
RG         1290.2
DW         20.050 us
DE         6.50 us
TE        301.9 K
D1        2.00000000 se
D11       0.03000000 se
TDO        1
----- CHANNEL f1 -----
NUC1     13C
P1        8.50 us
PL1      -4.00 dB
PL1W     70.66722107 W
SF01     100.6228298 MH
----- CHANNEL f2 -----
CPDPRG2  waltz16
NUC2     1H
PCPD2    80.00 us
PL2      -5.40 dB
PL12     10.80 dB
PL13     13.00 dB
PL1W     23.42892075 W
PL2W     0.56202066 W
PL3W     0.33865094 W
SF02     400.1316005 MH
SI        32768
SF        100.6127208 MH
WDW       EM
SSB       0
LB        1.00 Hz
GB        0
PC        1.40

```

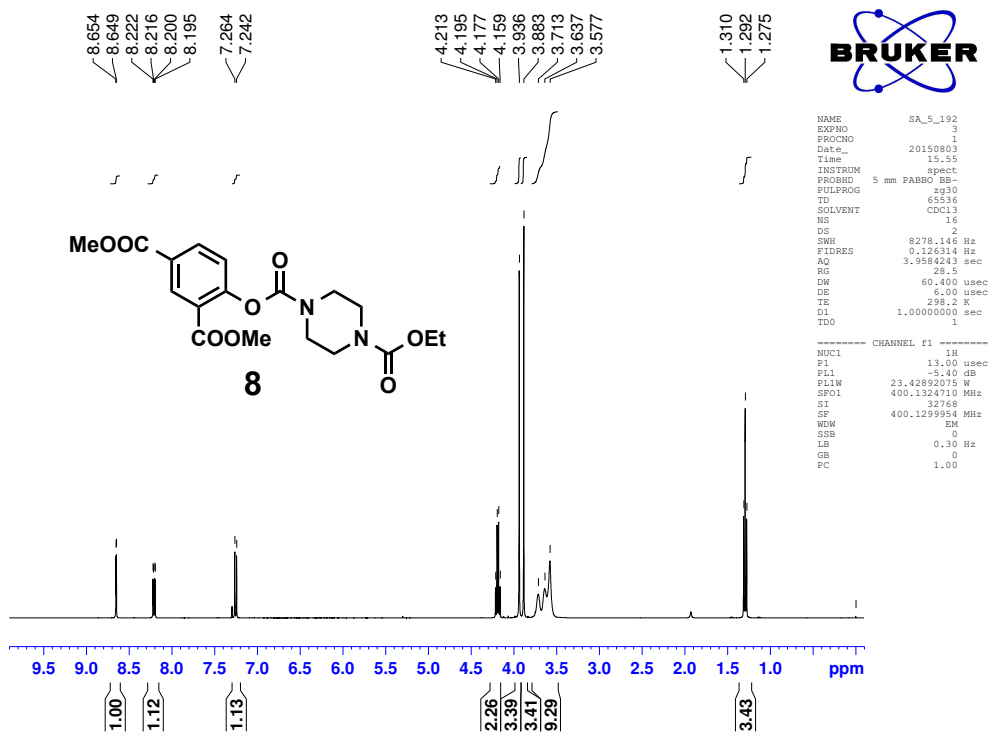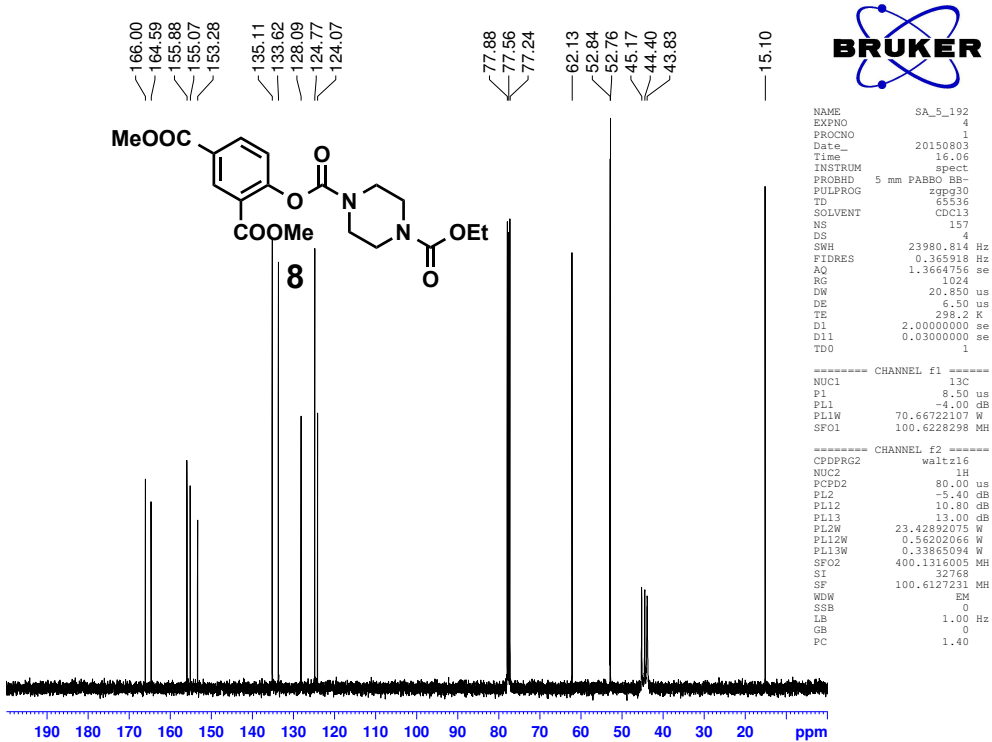

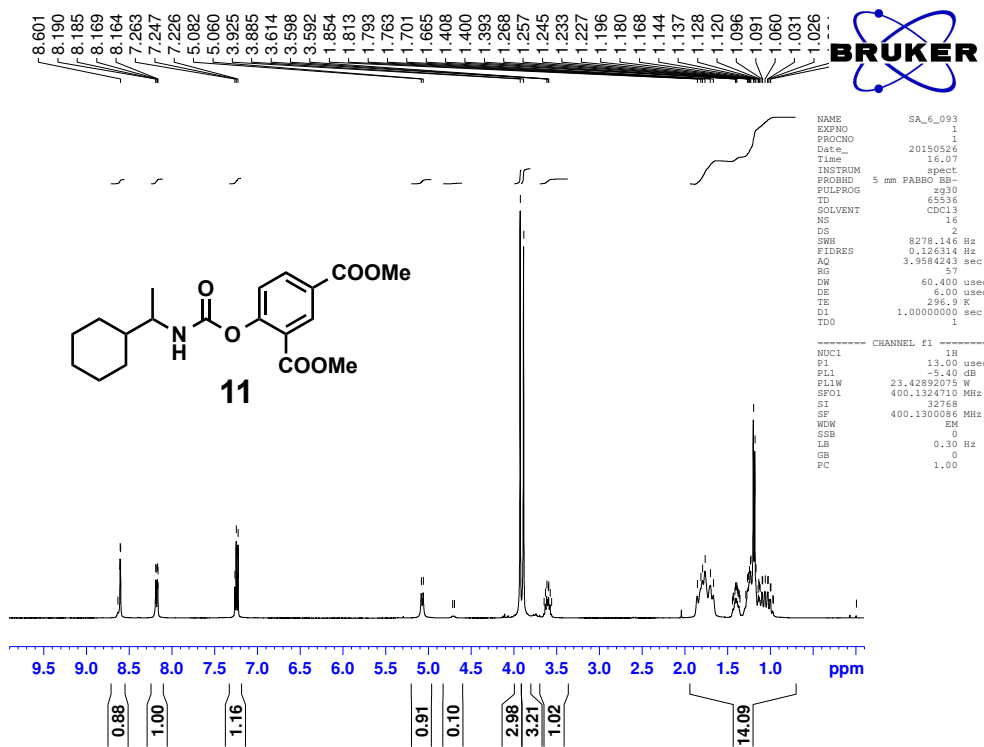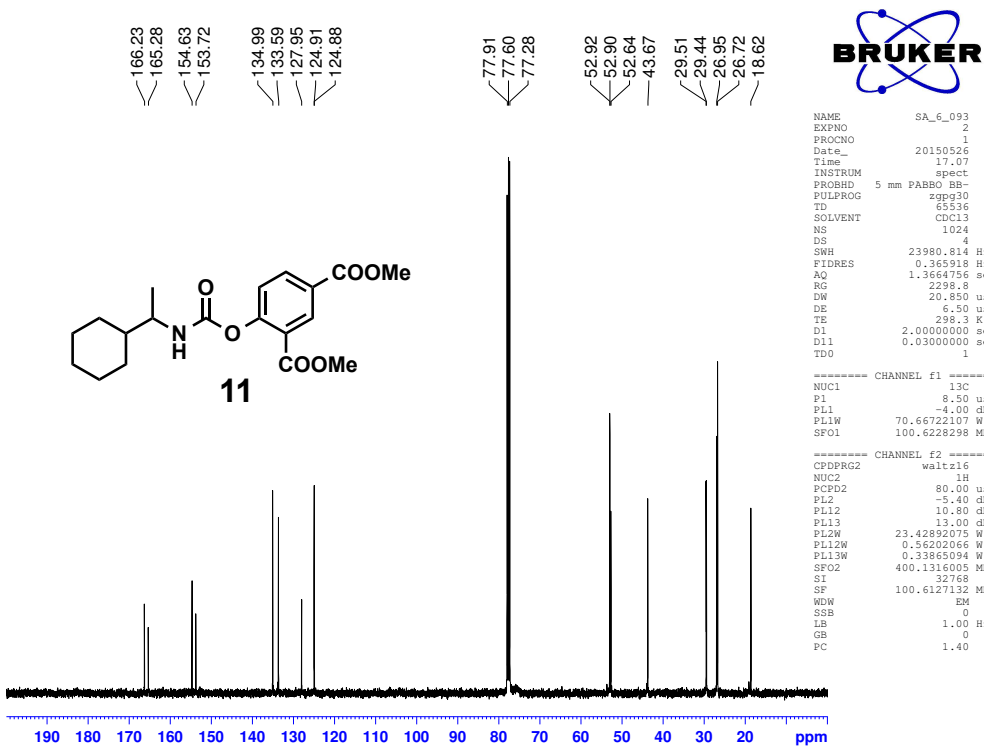

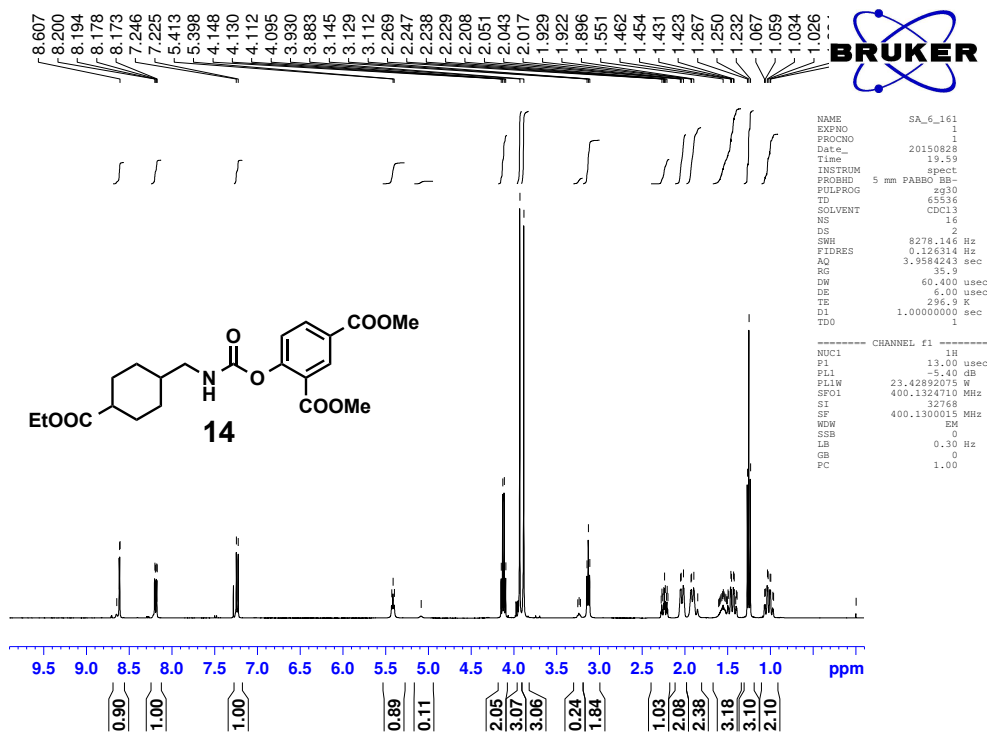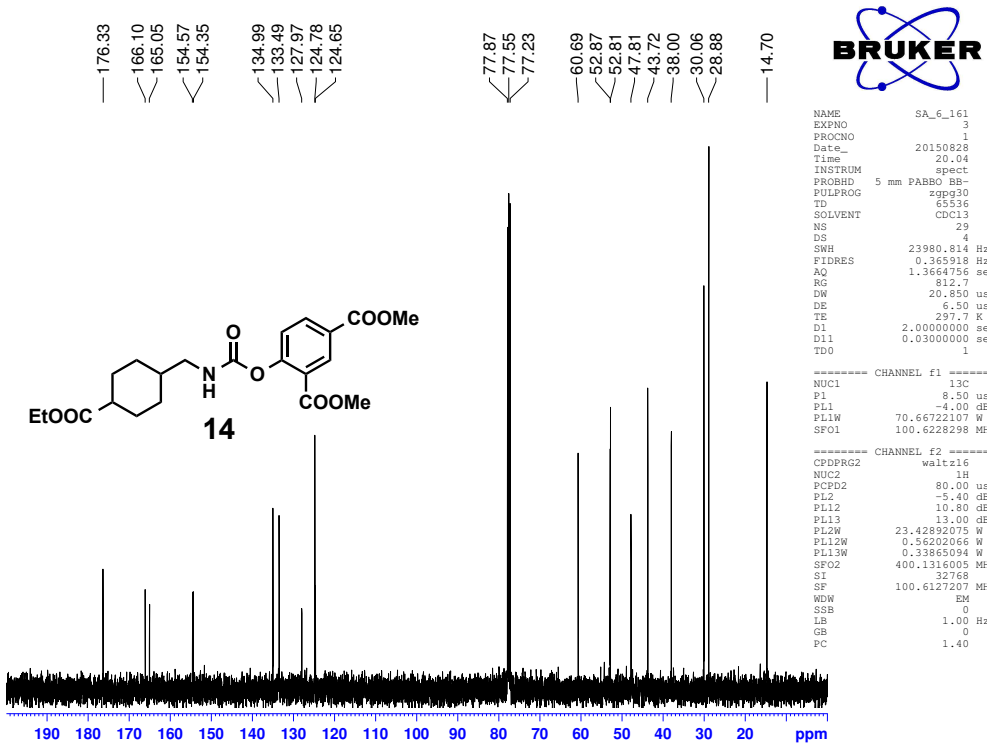

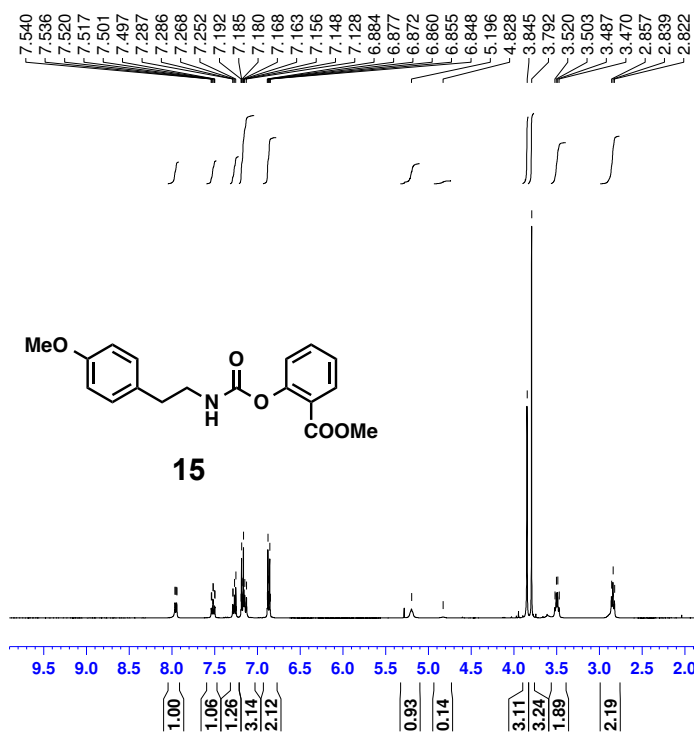

```

NAME      SA_6_008
EXPNO     1
PROCNO    1
Date_     20150320
Time      20.33
INSTRUM   spect
PROBHD    5 mm PABBO BB-
PULPROG   zg30
TD         65536
SOLVENT   CDCl3
NS         16
DS         2
SWH        8278.146 Hz
FIDRES     0.126314 Hz
AQ         3.9584243 sec
RG         71.8
DW         60.400 usec
DE         6.00 usec
TE         302.1 K
D1         1.00000000 sec
TDO
  
```

```

----- CHANNEL f1 -----
NUC1      1H
P1         13.00 usec
PL1        -5.40 dB
PL1W      23.42892075 W
SFO1      400.1324710 MHz
SI         32768
SF         400.1300127 MHz
WDW        EM
SSB         0
LB         0.30 Hz
GB         0
PC         1.00
  
```

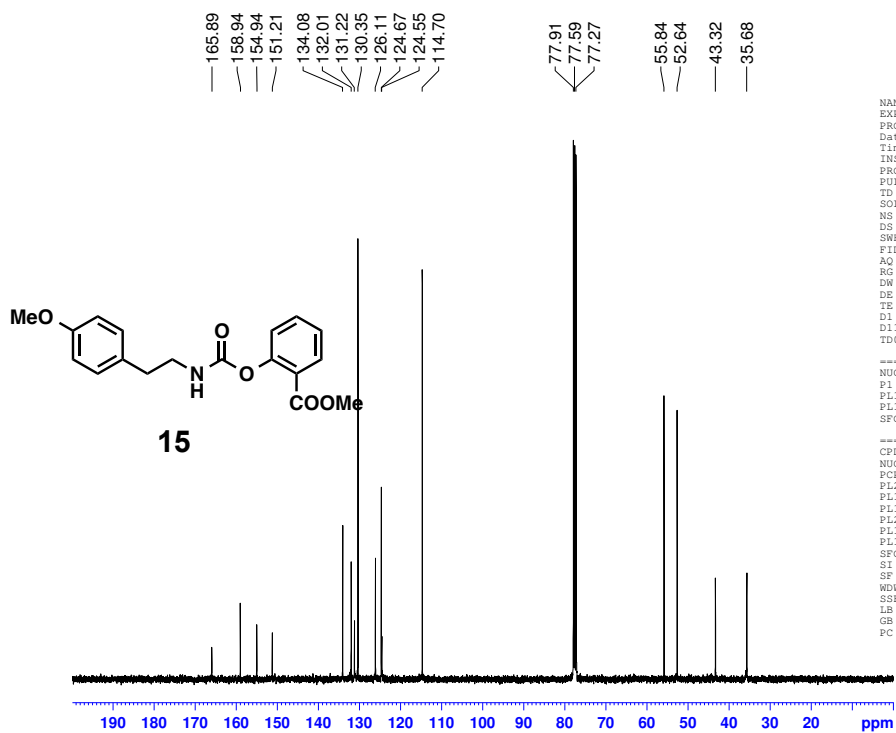

```

NAME      SA_6_008
EXPNO     2
PROCNO    1
Date_     20150320
Time      21.32
INSTRUM   spect
PROBHD    5 mm PABBO BB-
PULPROG   zgpg30
TD         65536
SOLVENT   CDCl3
NS         1024
DS         4
SWH        23980.814 Hz
FIDRES     0.365918 Hz
AQ         1.3664756 se
RG         2048
DW         20.650 us
DE         6.50 us
TE         303.2 K
D1         2.00000000 se
D11        0.03000000 se
TDO        1
  
```

```

----- CHANNEL f1 -----
NUC1      13C
P1         8.50 us
PL1        -4.00 dB
PL1W      70.66722107 W
SFO1      100.6228298 MH
  
```

```

----- CHANNEL f2 -----
CPDPRG2   waltz16
NUC2      1H
PCPD2     80.00 us
PL2        -5.40 dB
PL12      10.80 dB
PL13      13.00 dB
PL1W      23.42892075 W
PL12W     0.56202066 W
PL13W     0.33865094 W
SFO2      400.1316005 MH
SI         32768
SF         100.6127134 MH
WDW        EM
SSB         0
LB         1.00 Hz
GB         0
PC         1.40
  
```

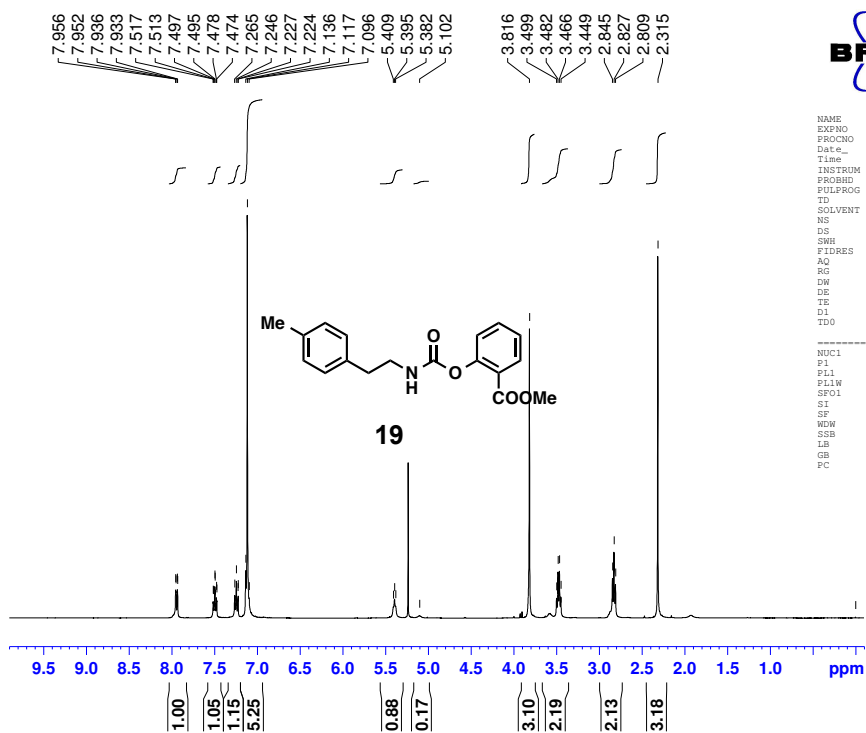

```

NAME SA_6_116
EXPNO 1
PROCNO 1
Date_ 20150826
Time 20.13
INSTRUM spect
PROBHD 5 mm PABBO BB-
PULPROG zg30
TD 65536
SOLVENT CDCl3
NS 16
DS 2
SWH 8278.146 Hz
FIDRES 0.126314 Hz
AQ 3.9584243 sec
RG 18
DW 60.400 usec
DE 6.00 usec
TE 297.4 K
D1 1.00000000 sec
TDO
----- CHANNEL f1 -----
NUC1 1H
P1 13.00 usec
PL1 -5.40 dB
PL1W 23.42892075 W
SF01 400.1324710 MHz
SI 32768
SF 400.1300241 MHz
WDW EM
SSB 0
LB 0.30 Hz
GB 0
PC 1.00
  
```

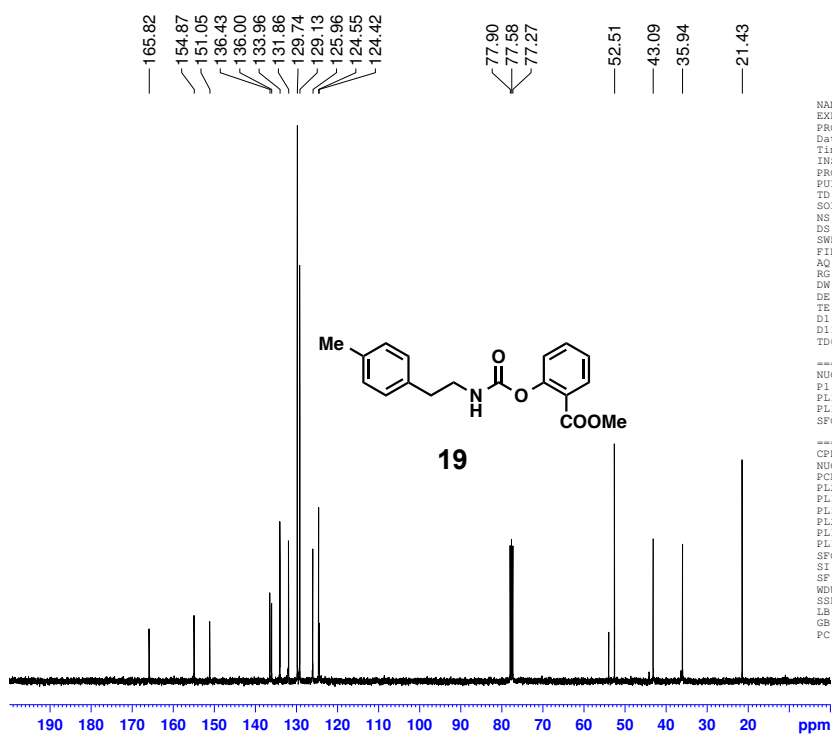

```

NAME SA_6_116
EXPNO 2
PROCNO 1
Date_ 20150826
Time 20.18
INSTRUM spect
PROBHD 5 mm PABBO BB-
PULPROG zgpg30
TD 65536
SOLVENT CDCl3
NS 66
DS 4
SWH 23980.814 Hz
FIDRES 0.365918 Hz
AQ 1.3664756 se
RG 812.7
DW 20.650 us
DE 6.50 us
TE 298.1 K
D1 2.00000000 se
D11 0.03000000 se
TDO 1
----- CHANNEL f1 -----
NUC1 13C
P1 8.50 us
PL1 -4.00 dB
PL1W 70.66722107 W
SF01 100.6228298 MH
----- CHANNEL f2 -----
CPDPRG2 waltz16
NUC2 1H
PCPD2 80.00 us
PL2 -5.40 dB
PL12 10.80 dB
PL13 13.00 dB
PL2W 23.42892075 W
PL12W 0.56202066 W
PL13W 0.33865094 W
SF02 400.1316005 MH
SI 32768
SF 100.6127315 MH
WDW EM
SSB 0
LB 1.00 Hz
GB 0
PC 1.40
  
```

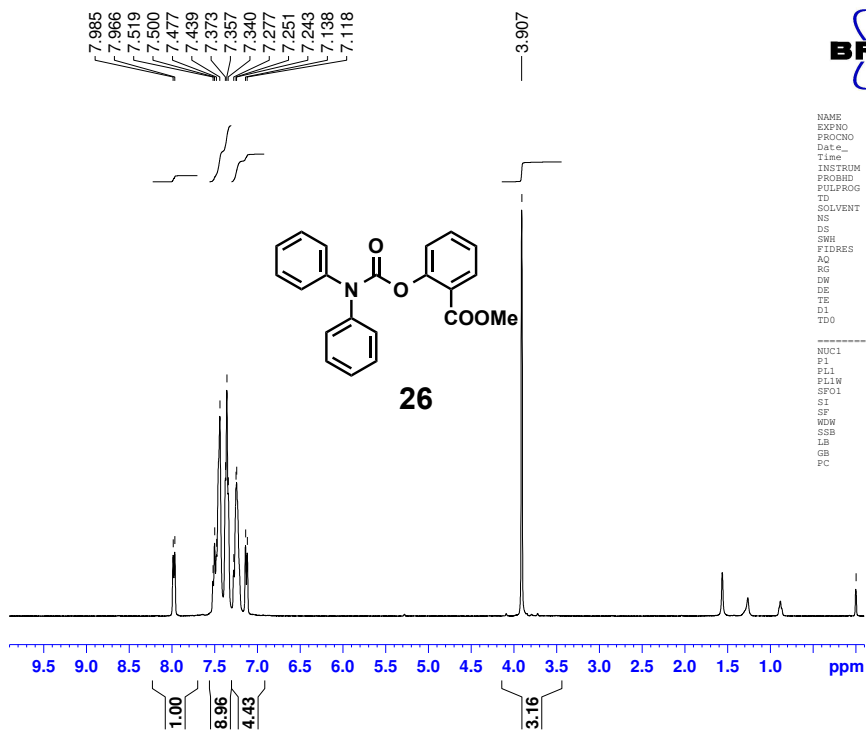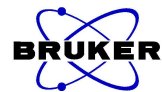

```

NAME      May17-2013
EXPNO    1
PROCNO   1
Date_    20130517
Time     15.08
INSTRUM  spect
PROBHD   5 mm PABBO BB-
PULPROG  zg30
TD        65536
SOLVENT  CDCl3
NS        16
DS        2
SWH       8278.146 Hz
FIDRES   0.126314 Hz
AQ        3.9584243 sec
RG         4
DW        60.400 usec
DE        6.00 usec
TE        296.4 K
D1        1.00000000 sec
TDO
----- CHANNEL f1 -----
NUC1      1H
P1        13.00 usec
PL1       -5.40 dB
PL1W      23.42892075 W
SFO1      400.1324710 MHz
SI         32768
SF         400.1300158 MHz
WDW       EM
SSB       0
LB        0.30 Hz
GB         0
PC         1.00

```

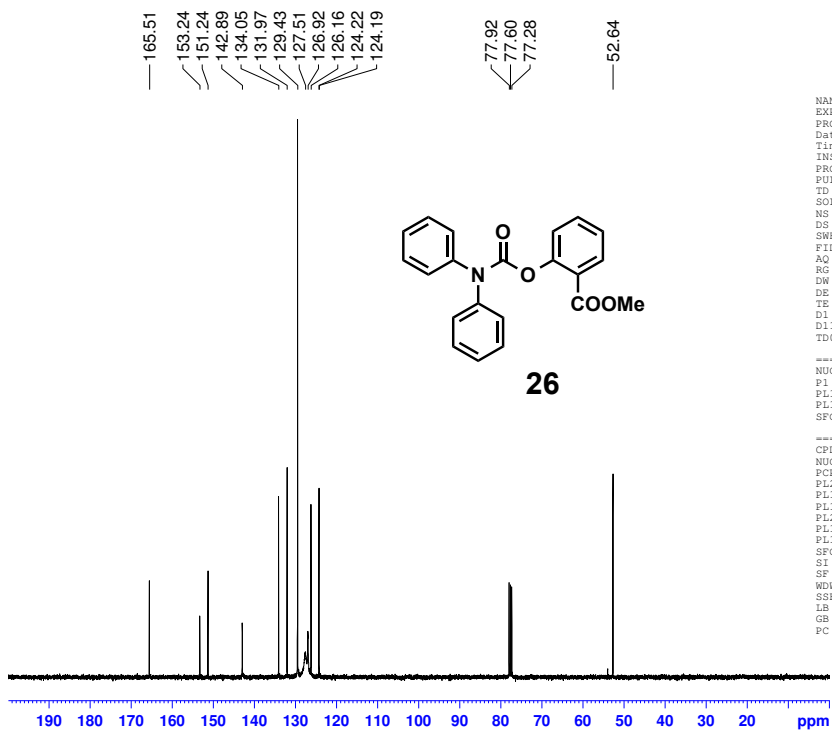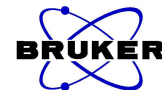

```

NAME      May18-2013
EXPNO    2
PROCNO   1
Date_    20130518
Time     16.06
INSTRUM  spect
PROBHD   5 mm PABBO BB-
PULPROG  zgpg30
TD        65536
SOLVENT  CDCl3
NS        65
DS        4
SWH       26178.010 Hz
FIDRES   0.399445 Hz
AQ        1.2517875 se
RG        1625.5
DW        19.100 us
DE        6.50 us
TE        297.6 K
D1        2.00000000 se
D11       0.03000000 se
TDO      1
----- CHANNEL f1 -----
NUC1      13C
P1        8.50 us
PL1       -4.00 dB
PL1W      70.66722107 W
SFO1      100.6228298 MH
----- CHANNEL f2 -----
CPDPRG2  waltz16
NUC2      1H
PCPD2     80.00 us
PL2       -5.40 dB
PL12      10.80 dB
PL13      13.00 dB
PL1W      23.42892075 W
PL12W     0.56202065 W
PL13W     0.33865094 W
SFO2      400.1316005 MH
SI         32768
SF         100.6127339 MH
WDW       EM
SSB       0
LB        1.00 Hz
GB         0
PC         1.40

```



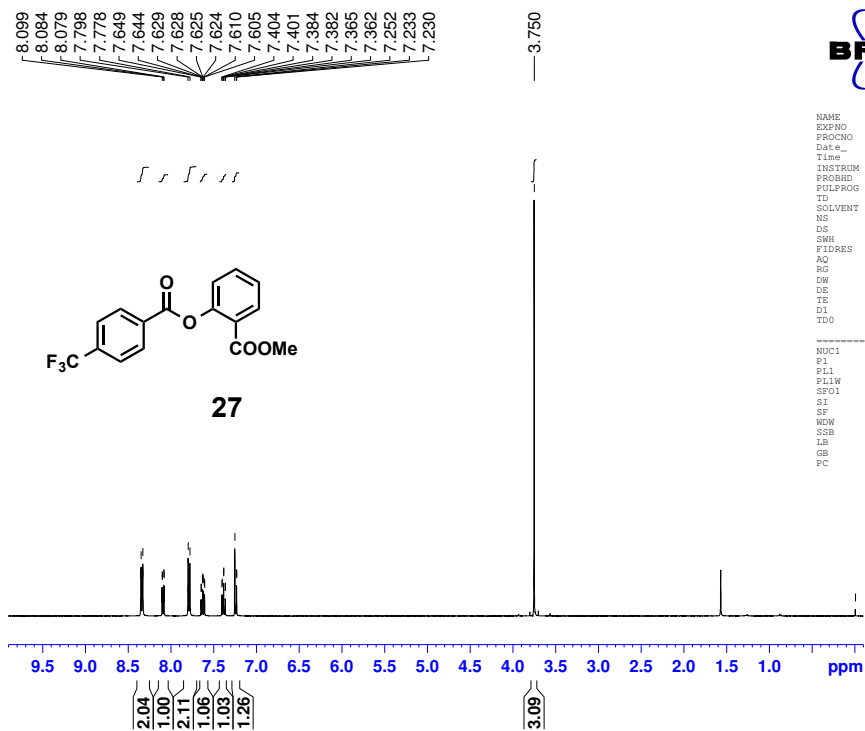

```

NAME      SA_6_000
EXPNO    20150717
PROCNO   1
Date_    20150717
Time     22.07
INSTRUM  spect
PROBHD   5 mm PABBO BB-
PULPROG  zg30
TD       65536
SOLVENT  CDCl3
NS       16
DS       2
SWH      8278.146 Hz
FIDRES   0.126314 Hz
AQ       3.9584243 sec
RG       4
DW       60.400 usec
DE       6.00 usec
TE       297.1 K
D1       1.00000000 sec
TDO      1
----- CHANNEL f1 -----
NUC1     1H
P1       13.00 usec
PL1      -5.40 dB
PL1W     23.42892075 W
SFO1     400.1324710 MHz
SI       32768
SF       400.1300132 MHz
WDW      EM
SSB      0
LB       0.30 Hz
GB       0
PC       1.00
  
```

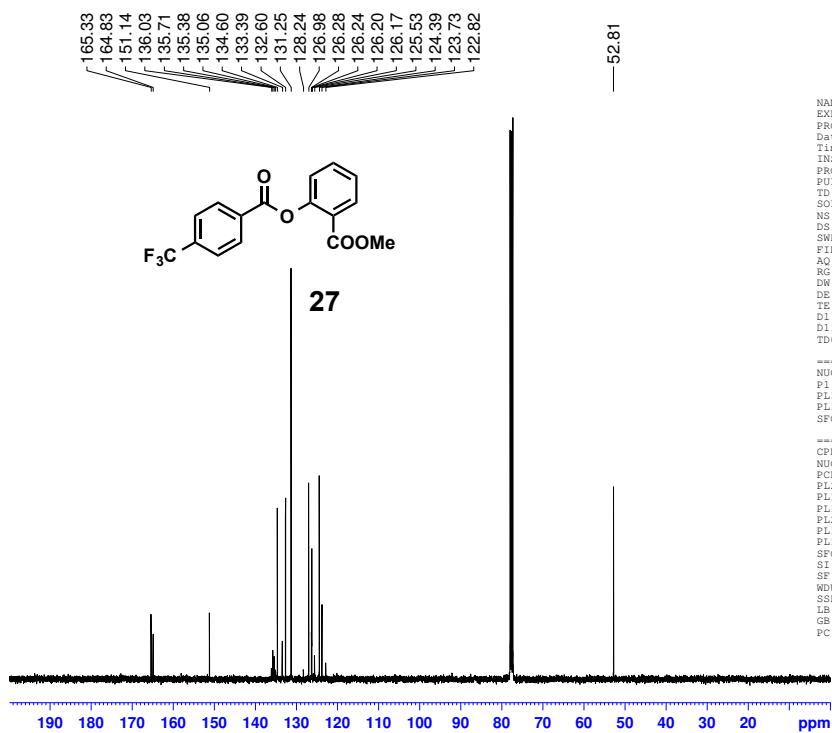

```

NAME      SA_6_000
EXPNO    20150717
PROCNO   1
Date_    20150717
Time     23.07
INSTRUM  spect
PROBHD   5 mm PABBO BB-
PULPROG  zgpg30
TD       65536
SOLVENT  CDCl3
NS       1024
DS       4
SWH      23980.814 Hz
FIDRES   0.365918 Hz
AQ       1.3664756 se
RG       812.7
DW       20.650 us
DE       6.50 us
TE       298.5 K
D1       2.00000000 se
D11      0.03000000 se
TDO      1
----- CHANNEL f1 -----
NUC1     13C
P1       8.50 us
PL1      -4.00 dB
PL1W     70.66722107 W
SFO1     100.6228298 MH
----- CHANNEL f2 -----
CPDPRG2  waltz16
NUC2     1H
PCPD2    80.00 us
PL2      -5.40 dB
PL12     10.80 dB
PL13     13.00 dB
PL1W     23.42892075 W
PL12W    0.56202066 W
PL13W    0.33865094 W
SFO2     400.1316005 MH
SI       32768
SF       100.6127118 MH
WDW      EM
SSB      0
LB       1.00 Hz
GB       0
PC       1.40
  
```

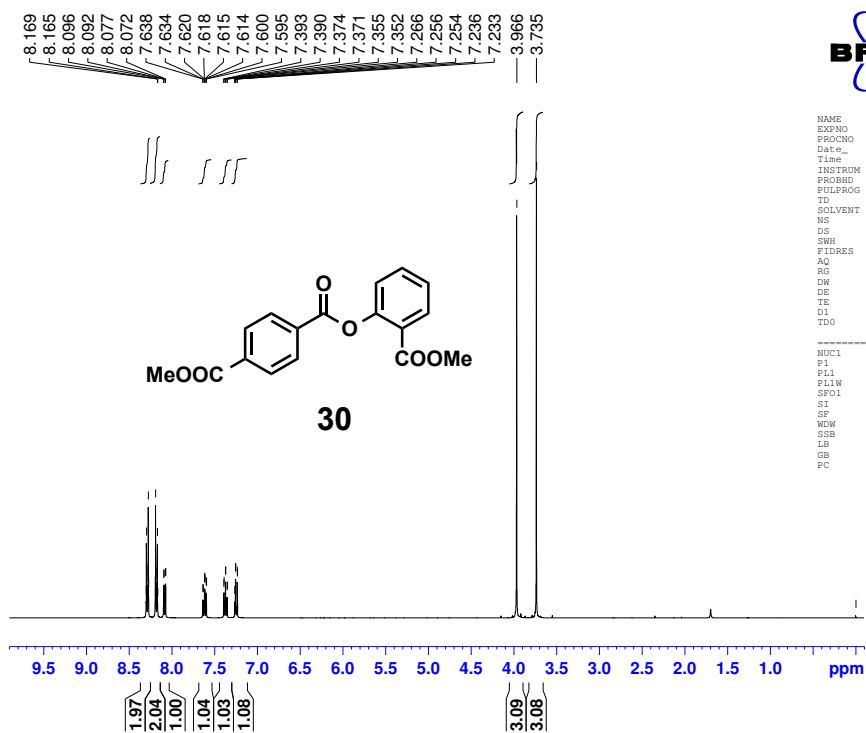

```

NAME SA_6_000
EXPNO 20150803
PROCNO 1
Date_ 20150803
Time 14.01
INSTRUM spect
PROBHD 5 mm PABBO BB-
PULPROG zg30
TD 65536
SOLVENT CDCl3
NS 16
DS 2
SWH 8278.146 Hz
FIDRES 0.126314 Hz
AQ 3.9584243 sec
RG 40.3
DW 60.400 usec
DE 6.00 usec
TE 298.2 K
D1 1.00000000 sec
TDO

----- CHANNEL f1 -----
NUC1 1H
P1 13.00 usec
PL1 -5.40 dB
PL1W 23.42892075 W
SF01 400.1324710 MHz
SI 32768
SF 400.1300075 MHz
WDW EM
SSB 0
LB 0.30 Hz
GB 0
PC 1.00

```

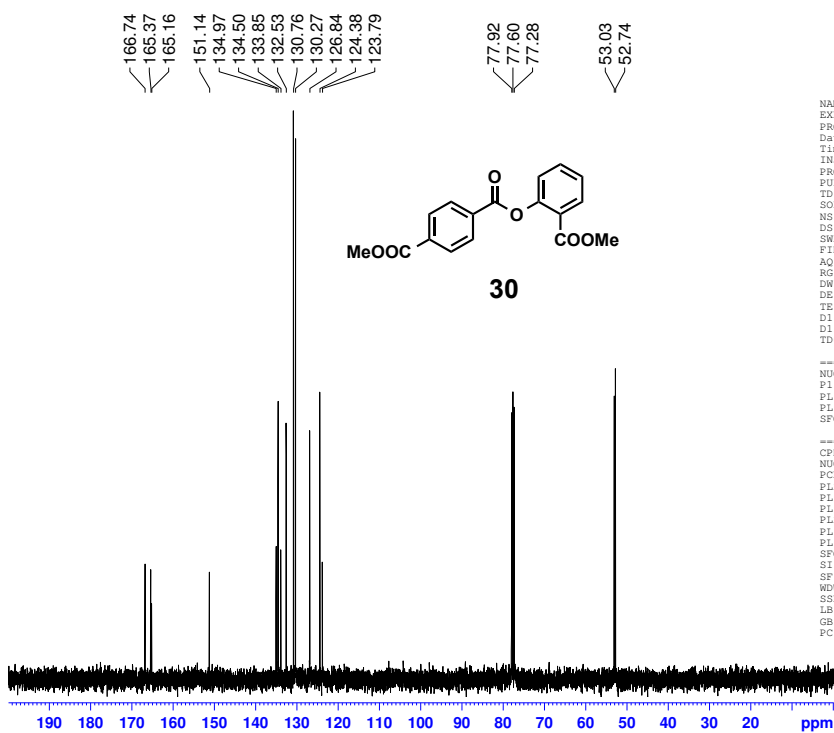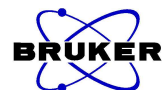

```

NAME SA_6_000
EXPNO 201508032
PROCNO 1
Date_ 20150803
Time 14.05
INSTRUM spect
PROBHD 5 mm PABBO BB-
PULPROG zgpg30
TD 65536
SOLVENT CDCl3
NS 22
DS 4
SWH 23980.814 Hz
FIDRES 0.365918 Hz
AQ 1.3664756 se
RG 812.7
DW 20.850 us
DE 6.50 us
TE 298.2 K
D1 2.00000000 se
D11 0.03000000 se
TDO 1

----- CHANNEL f1 -----
NUC1 13C
P1 8.50 us
PL1 -4.00 dB
PL1W 70.66722107 W
SF01 100.6228298 MH

----- CHANNEL f2 -----
CPDPRG2 waltz16
NUC2 1H
PCPD2 80.00 us
PL2 -5.40 dB
PL12 10.80 dB
PL13 13.00 dB
PL14W 23.42892075 W
PL12W 0.56202066 W
PL13W 0.33865094 W
SF02 400.1316005 MH
SI 32768
SF 100.6127161 MH
WDW EM
SSB 0
LB 1.00 Hz
GB 0
PC 1.40

```

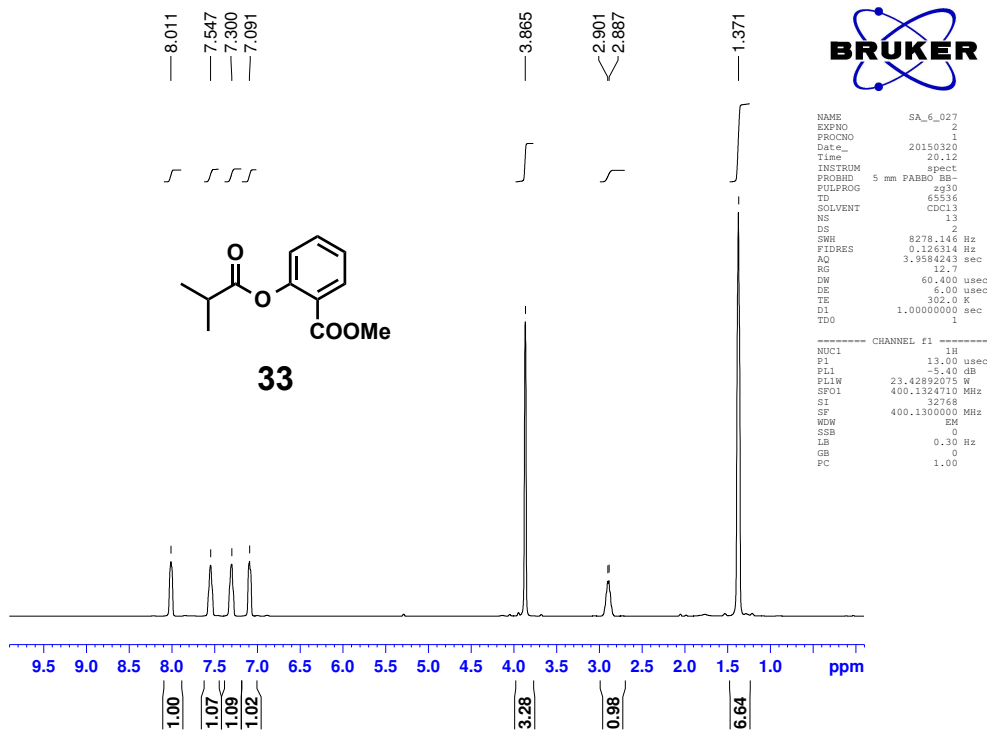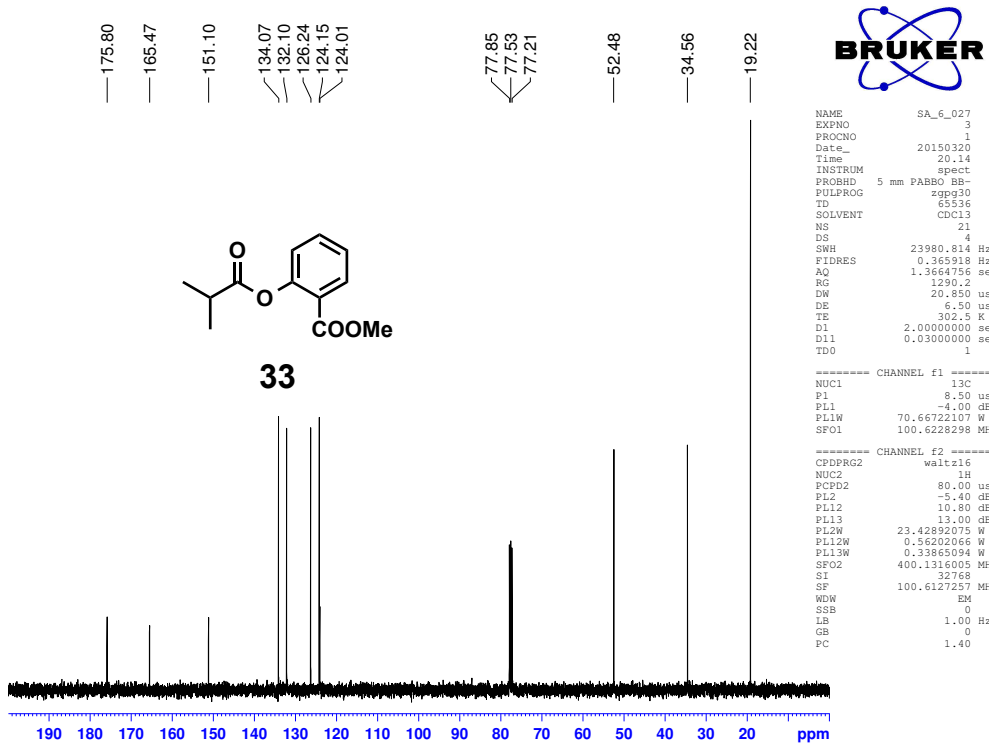

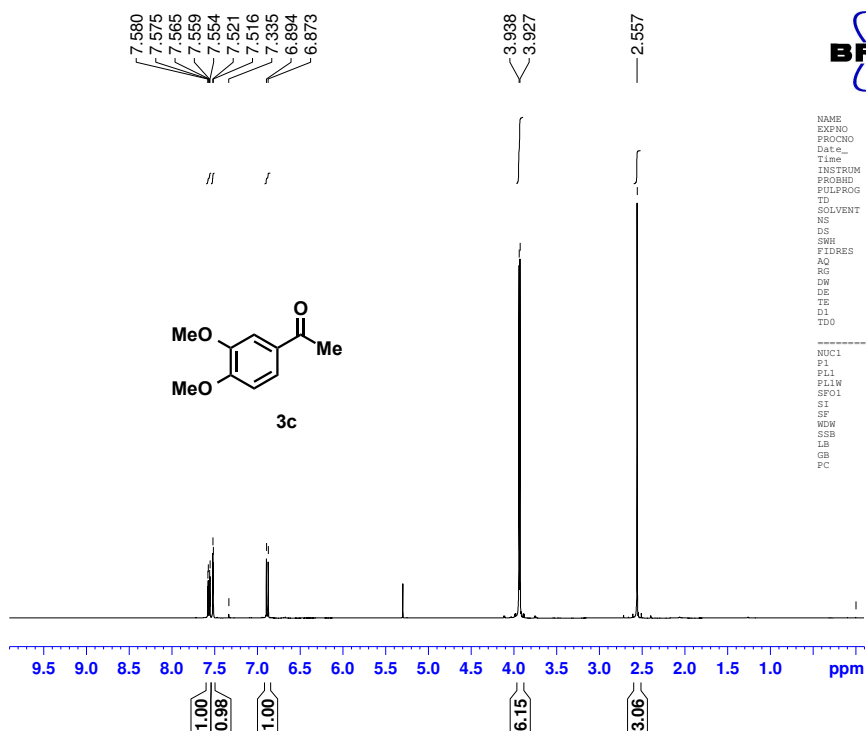

```

NAME SA_6_007
EXPNO 1
PROCNO 1
Date_ 20150311
Time 9.39
INSTRUM spect
PROBHD 5 mm PABBO BB-
PULPROG zg30
TD 65536
SOLVENT CDCl3
NS 16
DS 2
SWH 8278.146 Hz
FIDRES 0.126314 Hz
AQ 3.9584243 sec
RG 22.6
DW 60.400 usec
DE 6.00 usec
TE 301.2 K
D1 1.00000000 sec
TDO

----- CHANNEL f1 -----
NUC1 1H
P1 13.00 usec
PL1 -5.40 dB
PL1W 23.42892075 W
SF01 400.1324710 MHz
SI 32768
SF 400.1299794 MHz
WDW EM
SSB 0
LB 0.30 Hz
GB 0
PC 1.00

```

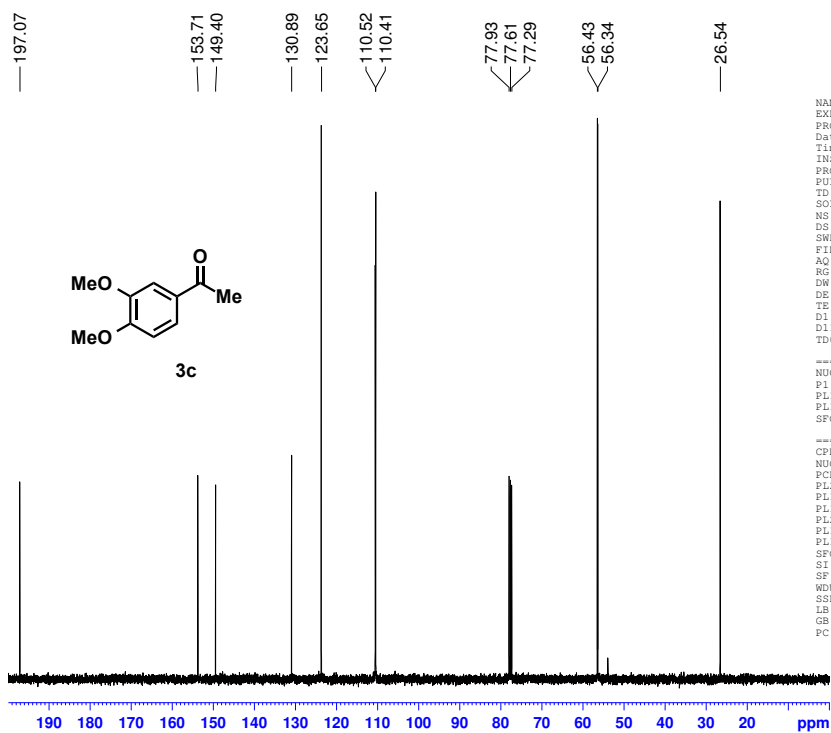

```

NAME SA_6_007
EXPNO 3
PROCNO 1
Date_ 20150311
Time 9.45
INSTRUM spect
PROBHD 5 mm PABBO BB-
PULPROG zgpg30
TD 65536
SOLVENT CDCl3
NS 56
DS 4
SWH 23980.814 Hz
FIDRES 0.365918 Hz
AQ 1.3664756 se
RG 812.7
DW 20.650 us
DE 6.50 us
TE 301.7 K
D1 2.00000000 se
D11 0.03000000 se
TDO 1

----- CHANNEL f1 -----
NUC1 13C
P1 8.50 us
PL1 -4.00 dB
PL1W 70.66722107 W
SF01 100.6228298 MH

----- CHANNEL f2 -----
CPDPRG2 waltz16
NUC2 1H
PCPD2 80.00 us
PL2 -5.40 dB
PL12 10.80 dB
PL13 13.00 dB
PL1W 23.42892075 W
PL12W 0.56202066 W
PL13W 0.33865094 W
SFO2 400.1316005 MH
SI 32768
SF 100.6127240 MH
WDW EM
SSB 0
LB 1.00 Hz
GB 0
PC 1.40

```

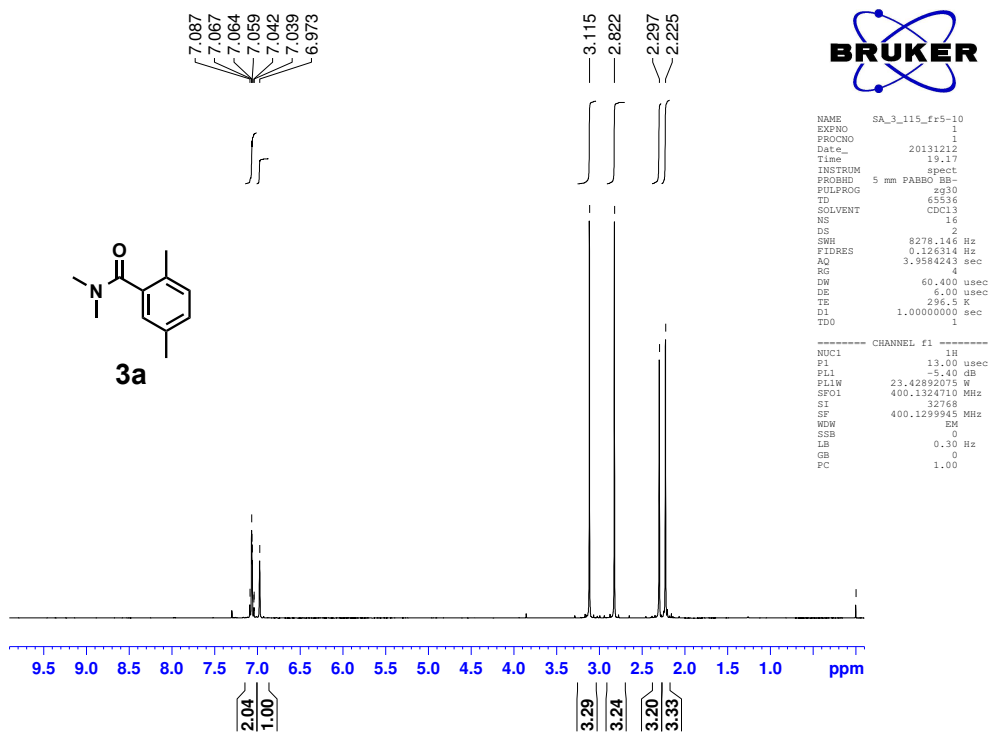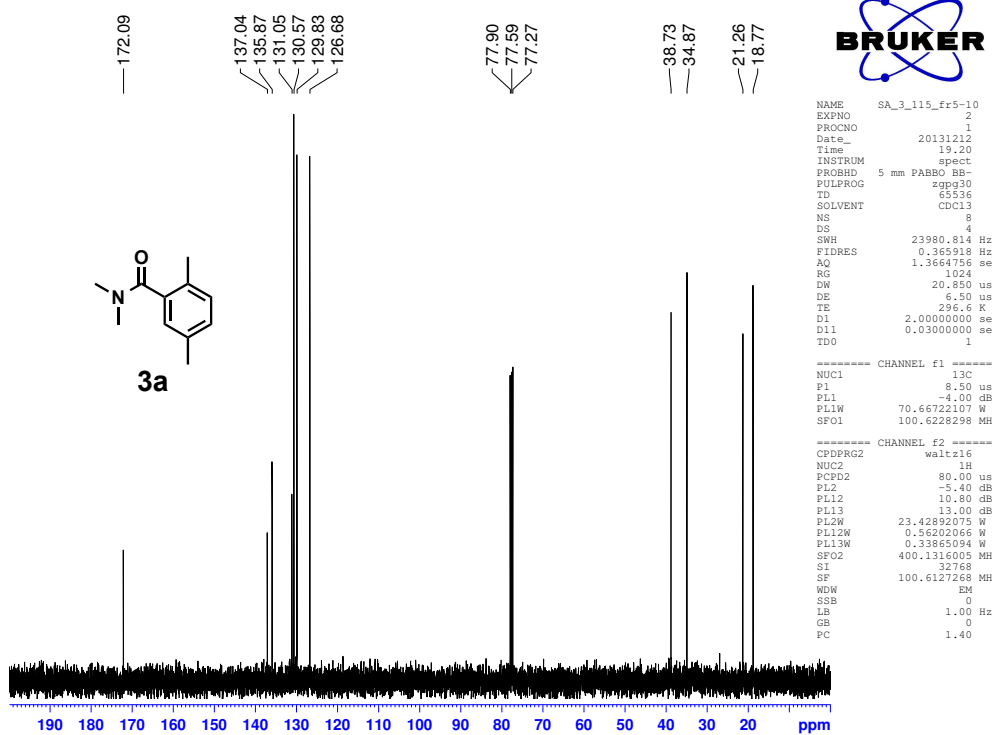

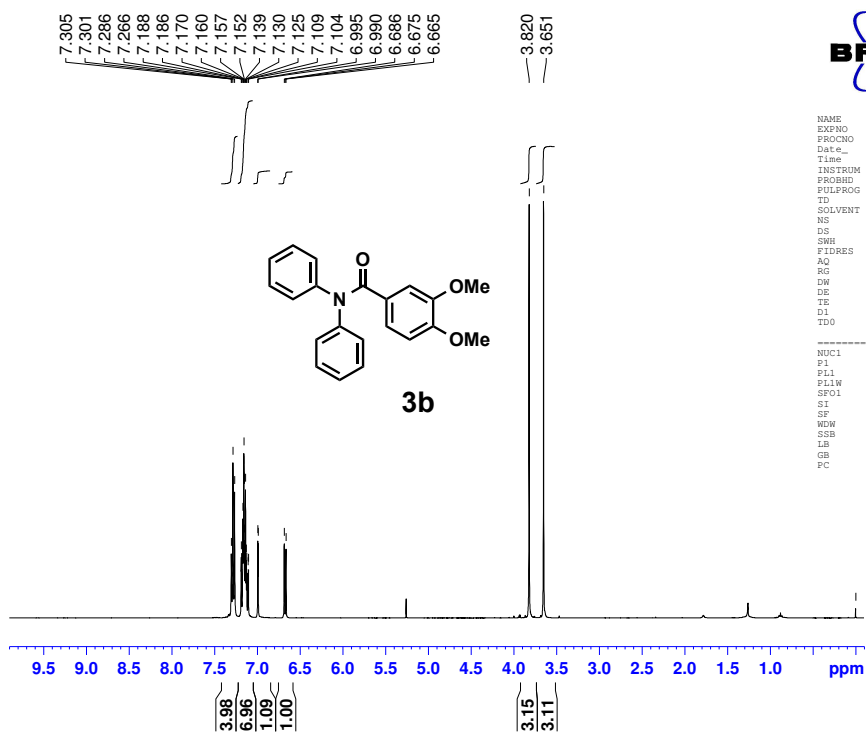

```

NAME      May20-2013
EXPNO    1
PROCNO   1
Date_    20130520
Time     18.10
INSTRUM  spect
PROBHD   5 mm PABBO BB-
PULPROG  zg30
TD        65536
SOLVENT  CDCl3
NS        16
DS        2
SWH       8278.146 Hz
FIDRES   0.126314 Hz
AQ        3.9584243 sec
RG         28.5
DW        60.400 usec
DE        6.00 usec
TE        296.6 K
D1        1.00000000 sec
TDO
----- CHANNEL f1 -----
NUC1      1H
P1         13.00 usec
PL1        -5.40 dB
PL1W      23.42892075 W
SFO1      400.1324710 MHz
SI         32768
SF         400.1300084 MHz
WDW        EM
SSB         0
LB         0.30 Hz
GB         0
PC         1.00

```

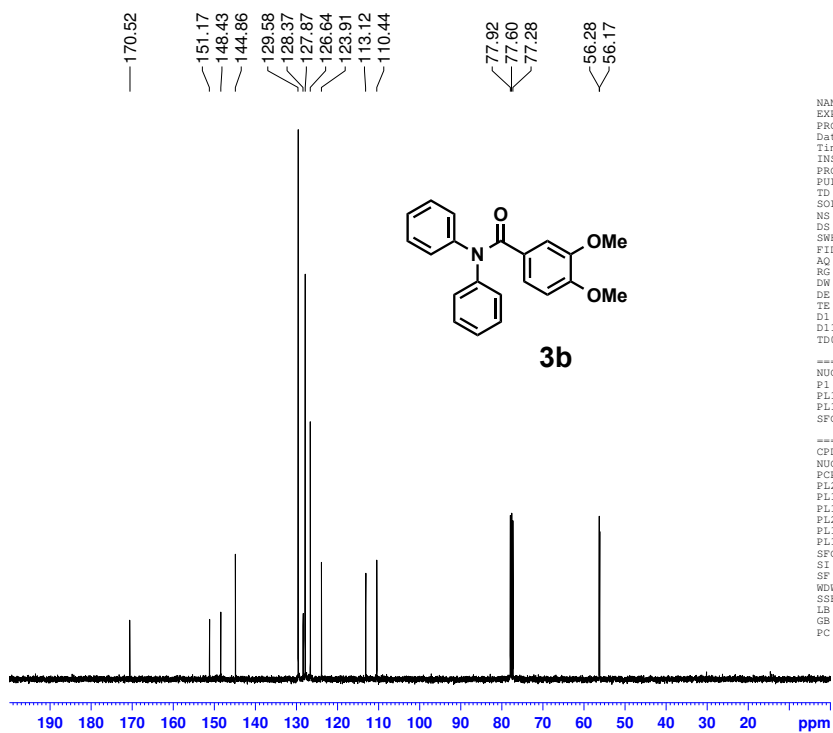

```

NAME      May20-2013
EXPNO    2
PROCNO   1
Date_    20130520
Time     18.16
INSTRUM  spect
PROBHD   5 mm PABBO BB-
PULPROG  zgpg30
TD        65536
SOLVENT  CDCl3
NS        48
DS        4
SWH       26178.010 Hz
FIDRES   0.399445 Hz
AQ        1.2517875 se
RG         2896.3
DW        19.100 us
DE         6.50 us
TE        297.3 K
D1        2.00000000 se
D11       0.03000000 se
TDO
----- CHANNEL f1 -----
NUC1      13C
P1         8.50 us
PL1        -4.00 dB
PL1W      70.66722107 W
SFO1      100.6228298 MH
----- CHANNEL f2 -----
CPDPRG2  waltz16
NUC2      1H
PCPD2     80.00 us
PL2        -5.40 dB
PL12     10.80 dB
PL13     13.00 dB
PL1W     23.42892075 W
PL12W    0.56202065 W
PL13W    0.33865094 W
SFO2     400.1316005 MH
SI         32768
SF        100.6127242 MH
WDW        EM
SSB         0
LB         1.00 Hz
GB         0
PC         1.40

```

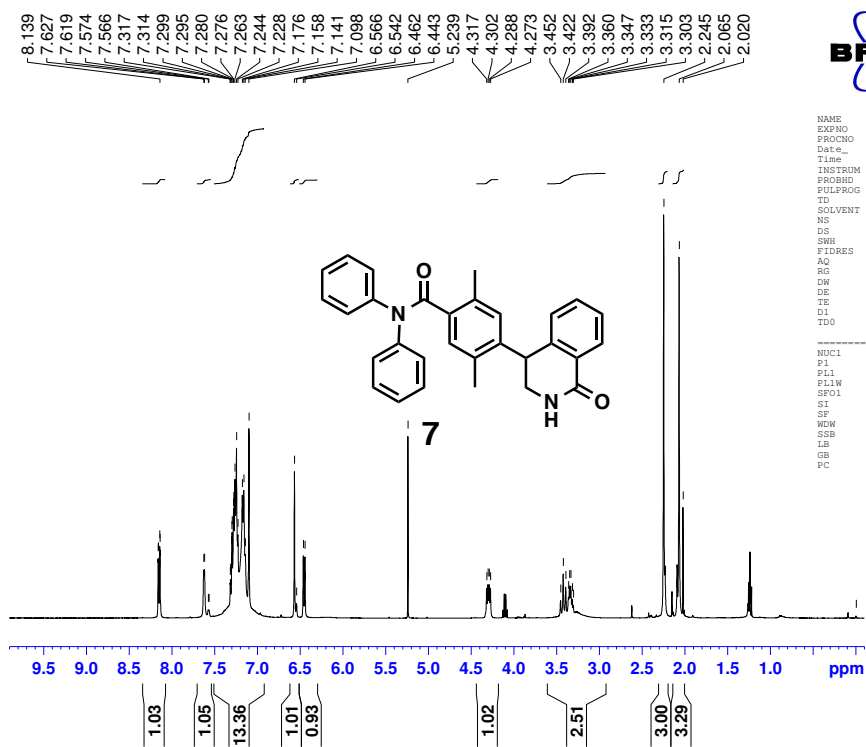

```

NAME SA_6_110
EXPNO 1
PROCNO 1
Date_ 20150602
Time 19.59
INSTRUM spect
PROBHD 5 mm PABBO BB-
PULPROG zg30
TD 65536
SOLVENT CDCl3
NS 16
DS 2
SWH 8278.146 Hz
FIDRES 0.126314 Hz
AQ 3.9584243 sec
RG 4
DW 60.400 usec
DE 6.00 usec
TE 297.2 K
D1 1.00000000 sec
TDO

----- CHANNEL f1 -----
NUC1 1H
P1 13.00 usec
PL1 -5.40 dB
PL1W 23.42892075 W
SF01 400.1324710 MHz
SI 32768
SF 400.1300167 MHz
WDW EM
SSB 0
LB 0.30 Hz
GB 0
PC 1.00

```

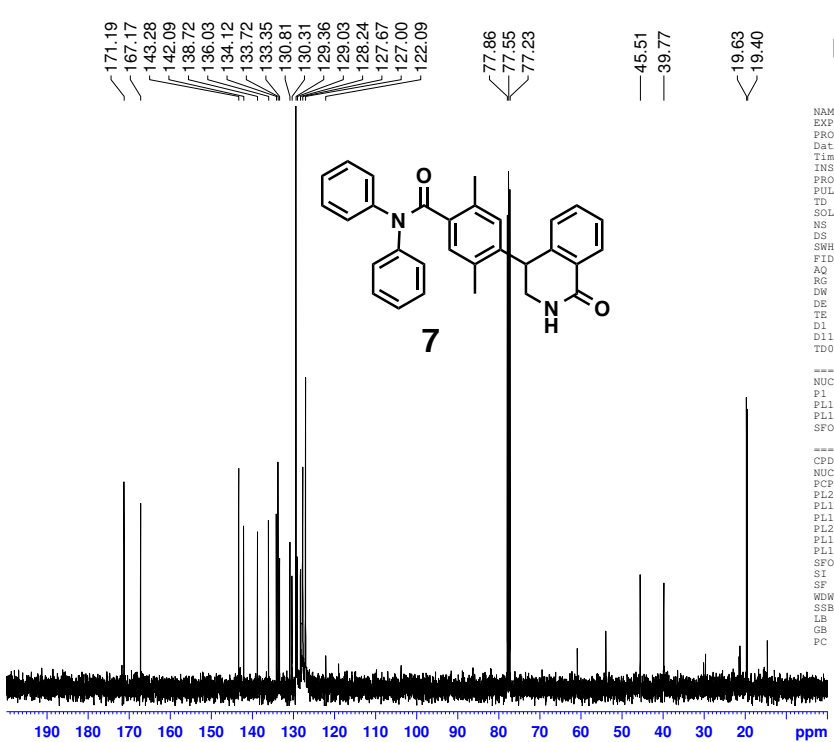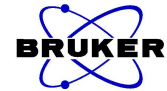

```

NAME SA_6_110
EXPNO 2
PROCNO 1
Date_ 20150602
Time 20.03
INSTRUM spect
PROBHD 5 mm PABBO BB-
PULPROG zgpg30
TD 65536
SOLVENT CDCl3
NS 39
DS 4
SWH 23980.814 Hz
FIDRES 0.365918 Hz
AQ 1.3664756 se
RG 2298.8
DW 20.650 us
DE 6.50 us
TE 297.9 K
D1 2.00000000 se
D11 0.03000000 se
TDO 1

----- CHANNEL f1 -----
NUC1 13C
P1 8.50 us
PL1 -4.00 dB
PL1W 70.66722107 W
SF01 100.6228298 MH

----- CHANNEL f2 -----
CPDPRG2 waltz16
NUC2 1H
PCPD2 80.00 us
PL2 -5.40 dB
PL12 10.80 dB
PL13 13.00 dB
PL1W 23.42892075 W
PL12W 0.56202066 W
PL13W 0.33865094 W
SF02 400.1316005 MH
SI 32768
SF 100.6127335 MH
WDW EM
SSB 0
LB 1.00 Hz
GB 0
PC 1.40

```

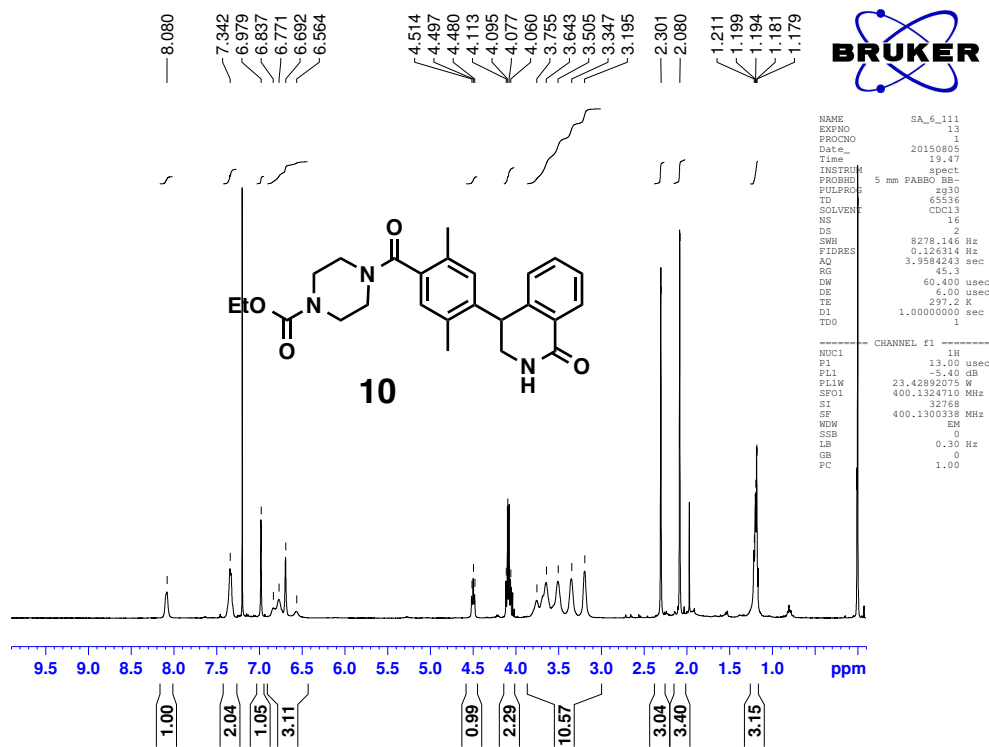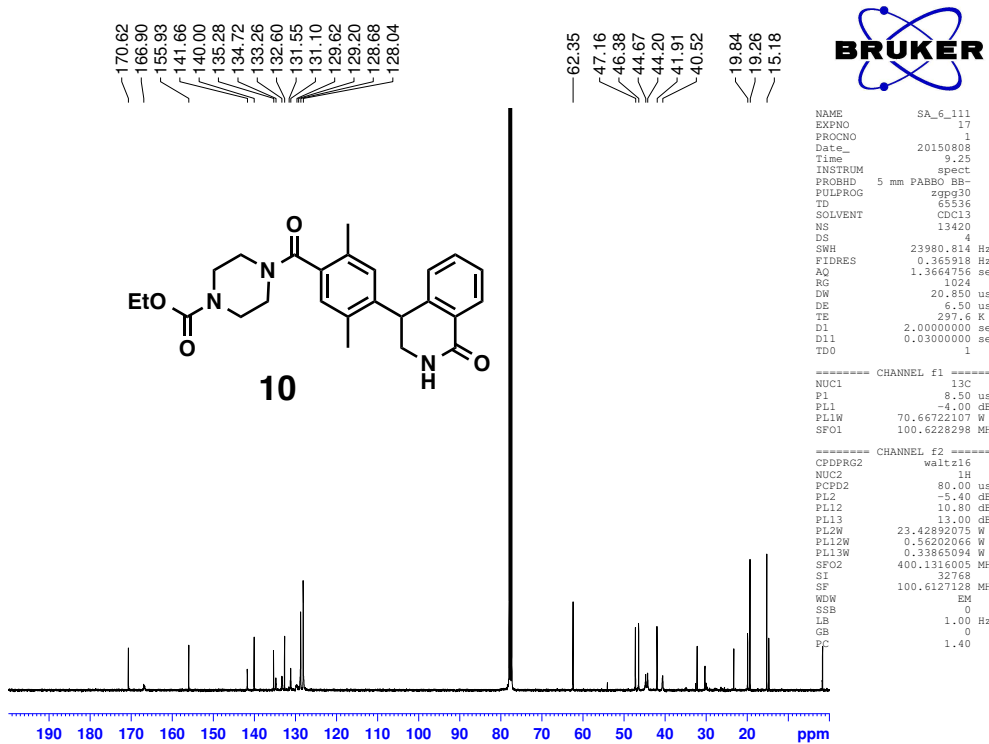



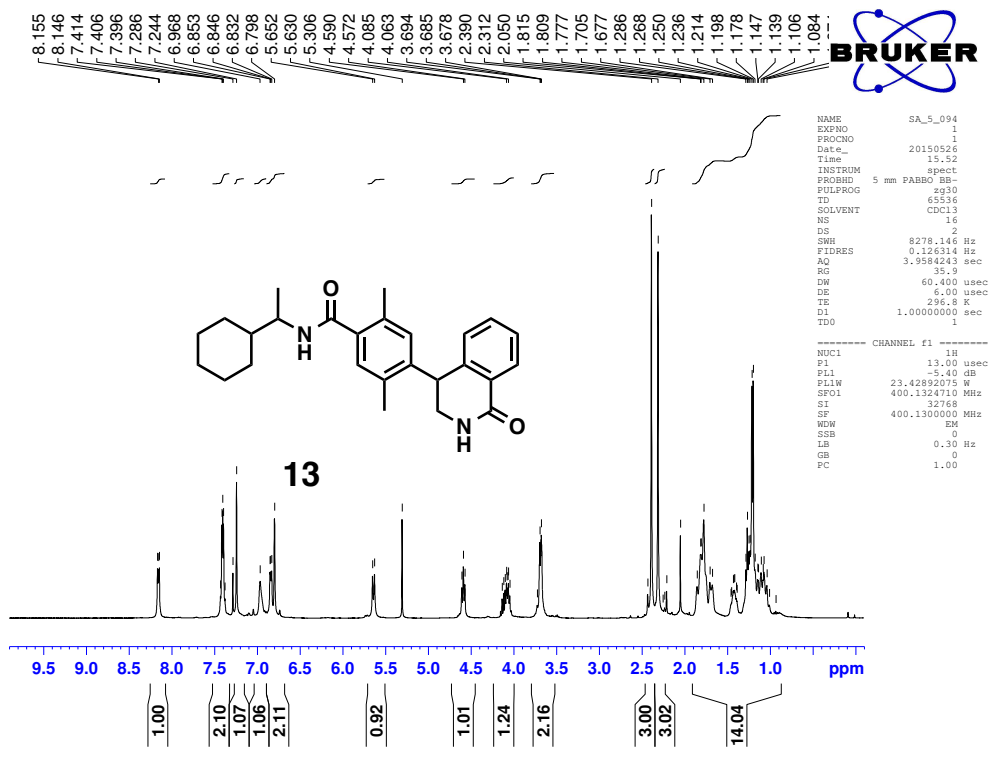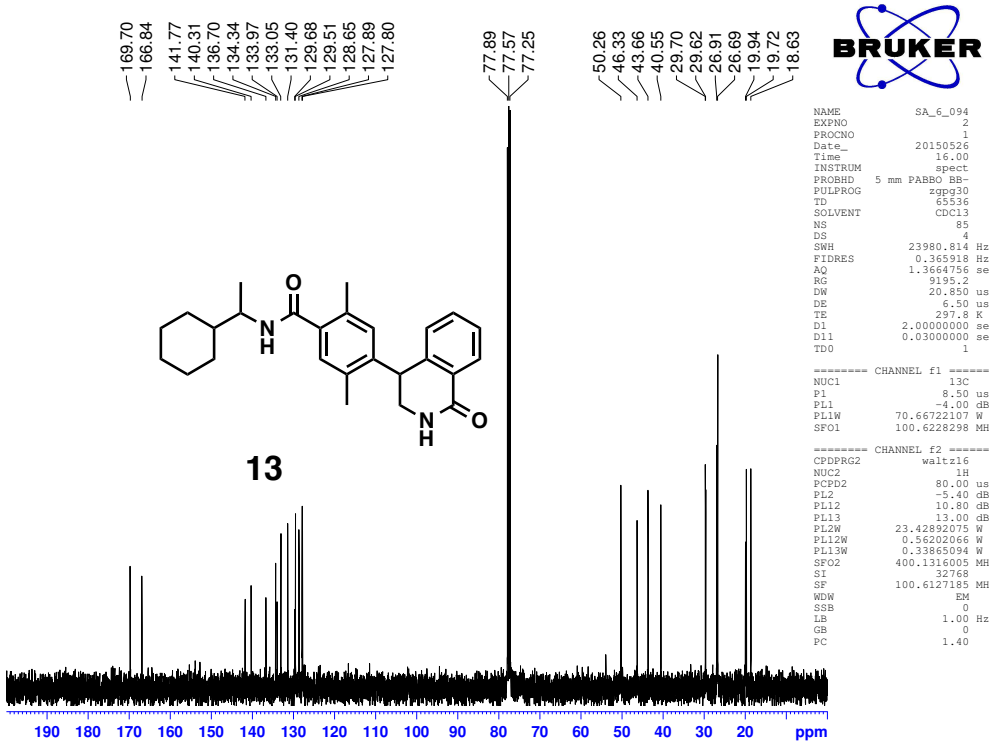

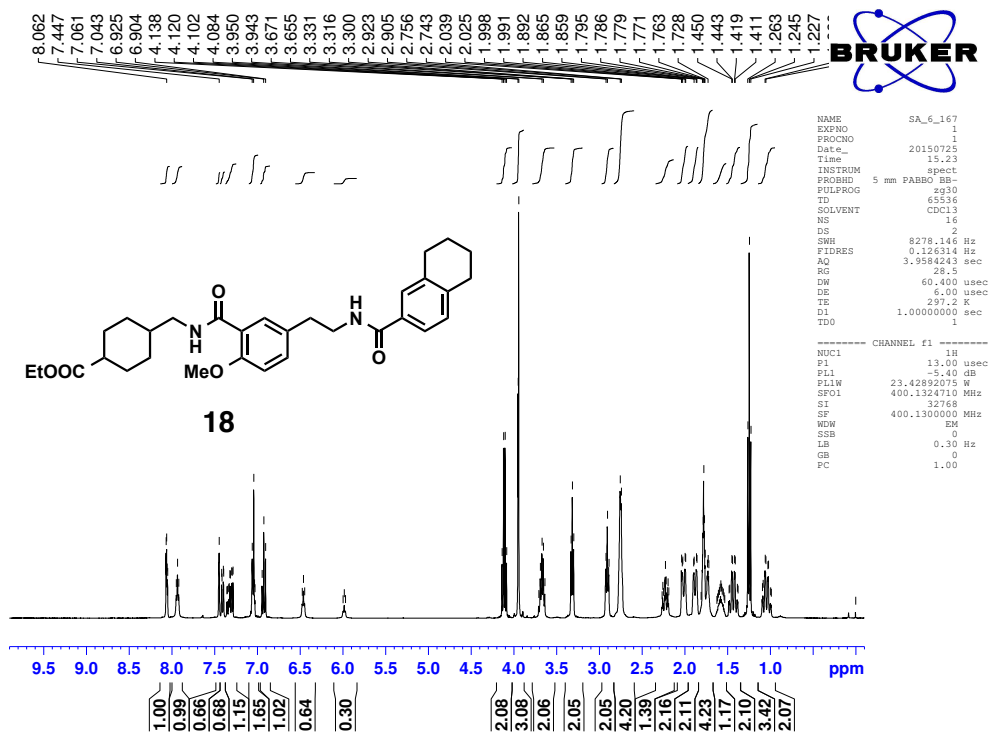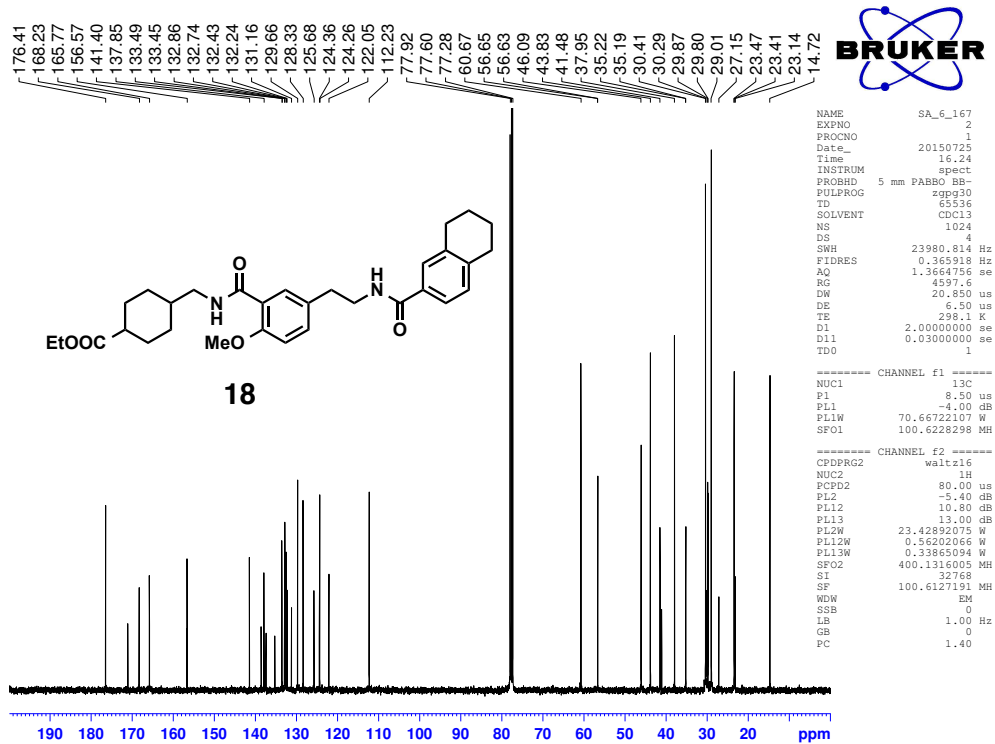

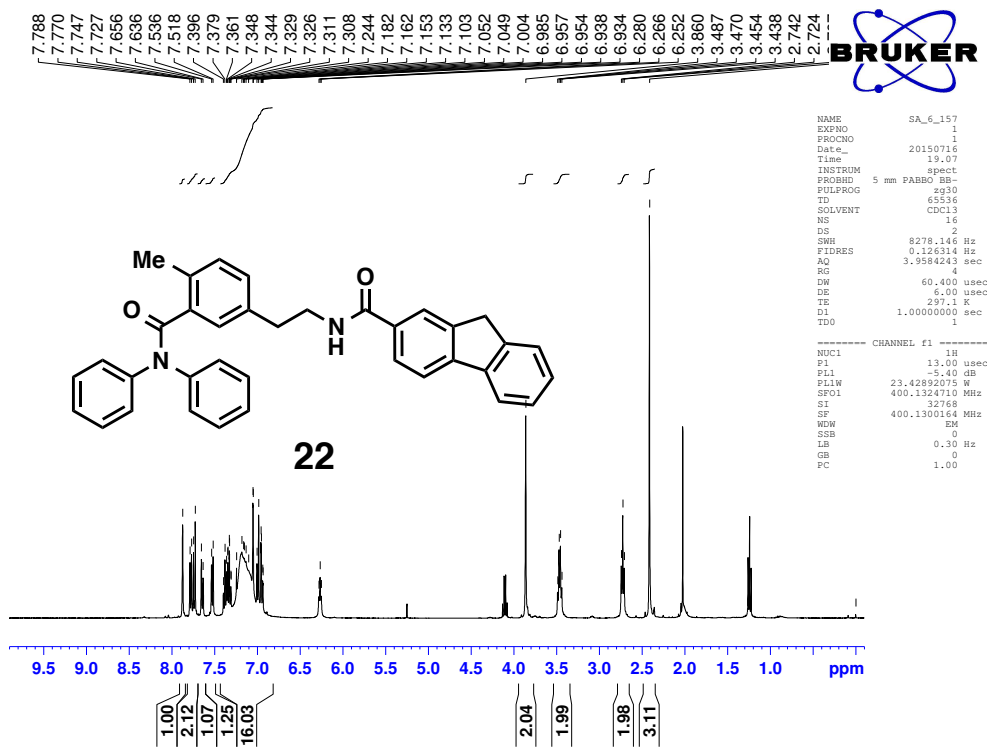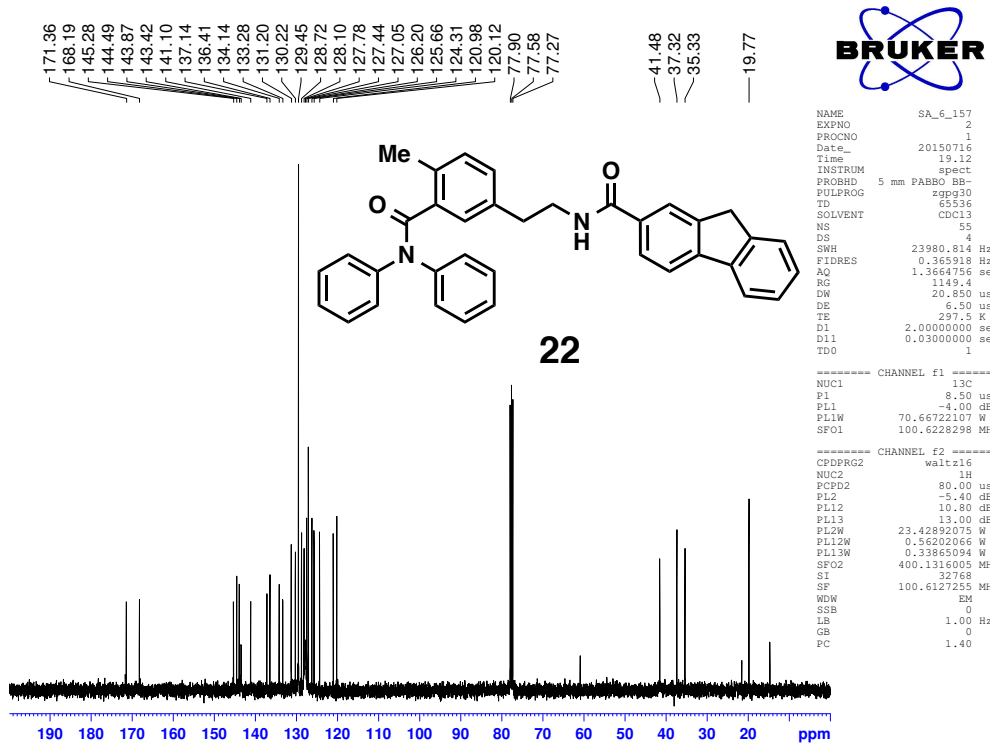

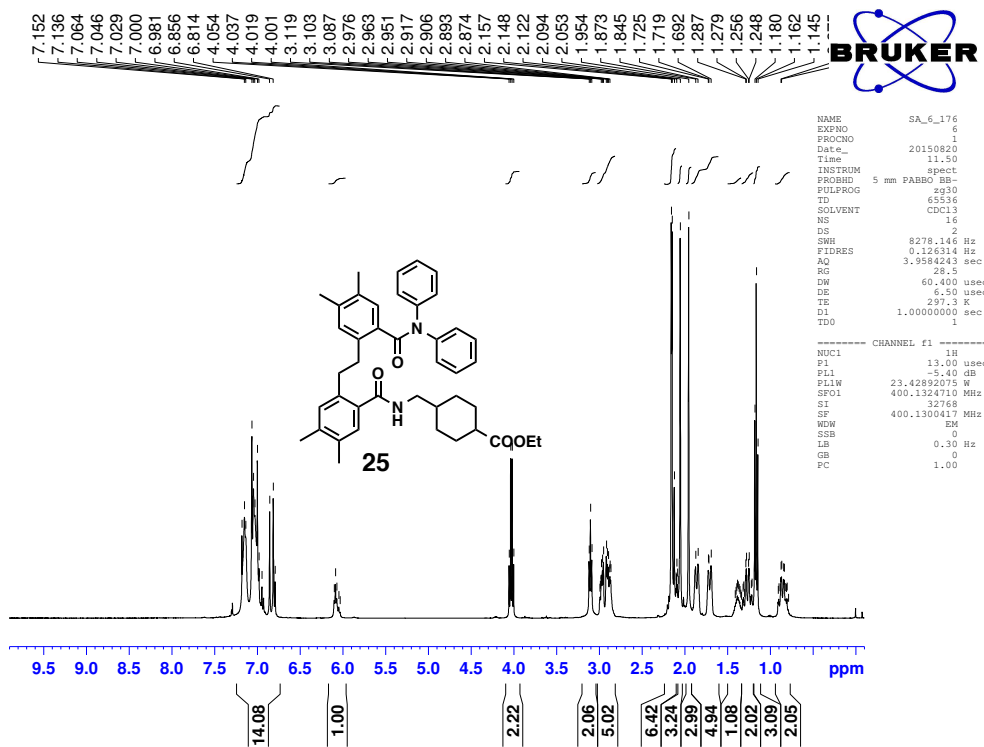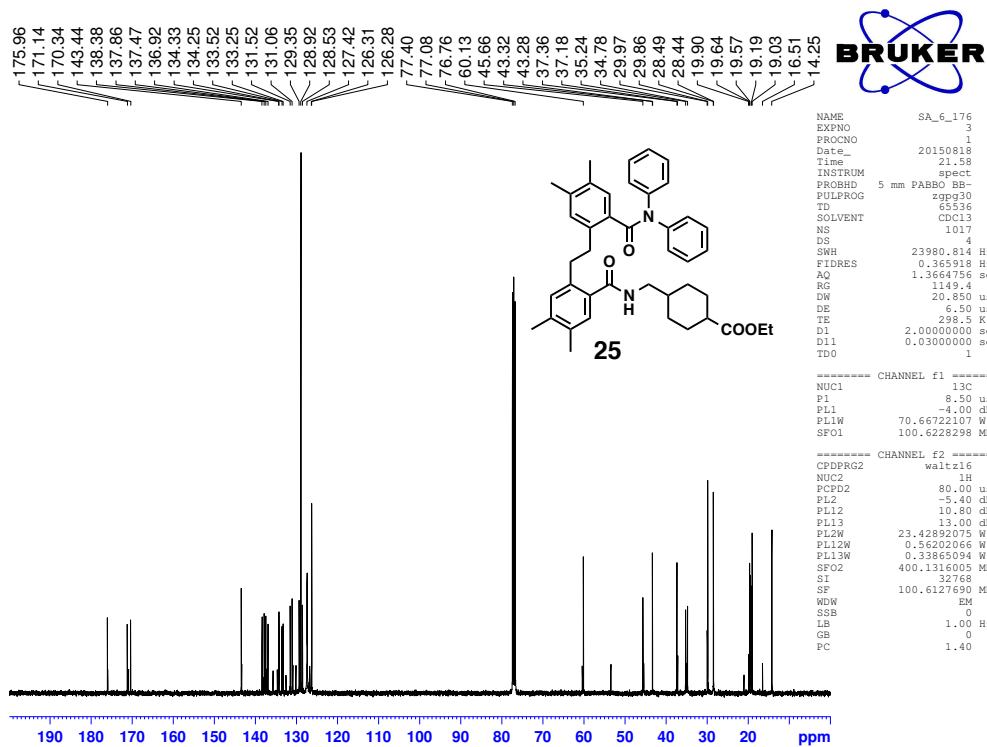

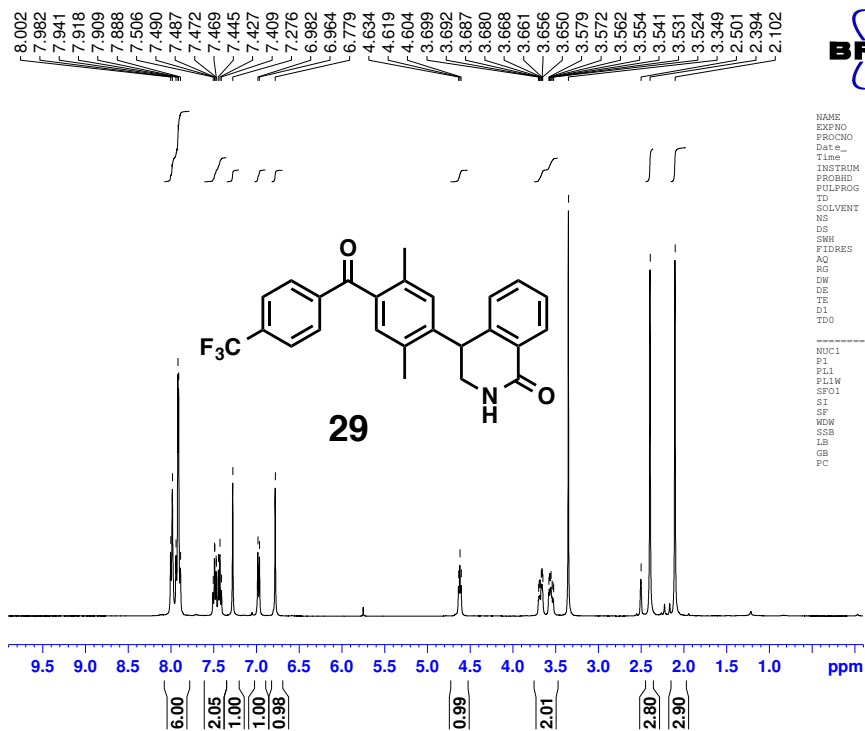

```

NAME SA_6_061
EXPNO 4
PROCNO 1
Date_ 20150701
Time 20.09
INSTRUM spect
PROBHD 5 mm PABBO BB-
PULPROG zg30
TD 65536
SOLVENT DMSO
NS 16
DS 2
SWH 8278.146 Hz
FIDRES 0.126314 Hz
AQ 3.9584243 sec
RG 64
DW 60.400 usec
DE 6.00 usec
TE 297.4 K
D1 1.00000000 sec
TDO

----- CHANNEL f1 -----
NUC1 1H
P1 13.00 usec
PL1 -5.40 dB
PL1W 23.42892075 W
SFO1 400.1324710 MHz
SI 32768
SF 400.1300038 MHz
WDW EM
SSB 0
LB 0.30 Hz
GB 0
PC 1.00

```

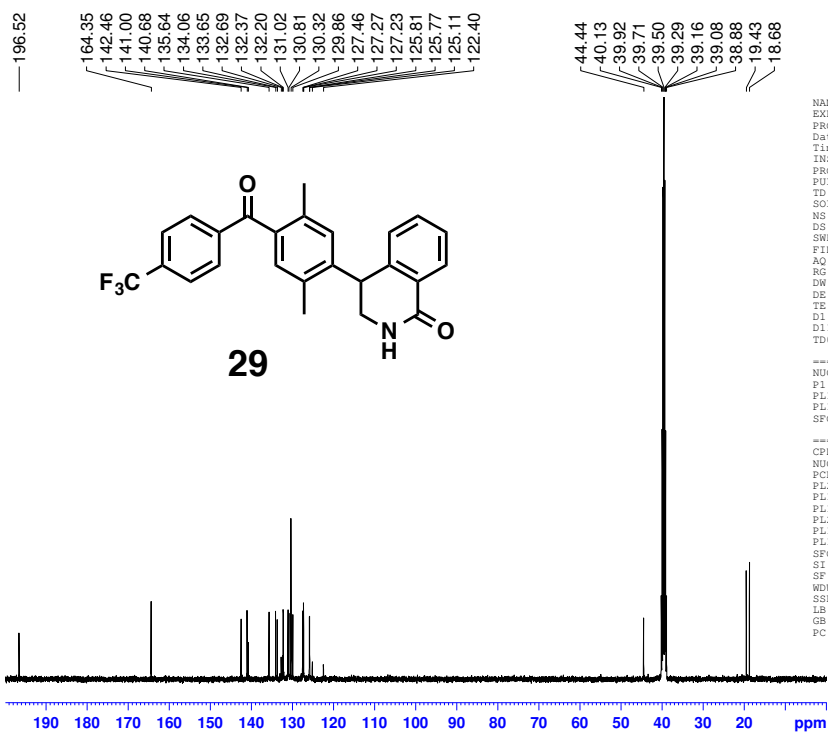

```

NAME SA_6_061
EXPNO 5
PROCNO 1
Date_ 20150701
Time 20.36
INSTRUM spect
PROBHD 5 mm PABBO BB-
PULPROG zgpg30
TD 65536
SOLVENT DMSO
NS 429
DS 4
SWH 23980.814 Hz
FIDRES 0.365918 Hz
AQ 1.3664756 se
RG 1149.4
DW 20.850 us
DE 6.50 us
TE 298.1 K
D1 2.00000000 se
D11 0.03000000 se
TDO 1

----- CHANNEL f1 -----
NUC1 13C
P1 8.50 us
PL1 -4.00 dB
PL1W 70.66722107 W
SFO1 100.6228298 MH

----- CHANNEL f2 -----
CPDPRG2 waltz16
NUC2 1H
PCPD2 80.00 us
PL2 -5.40 dB
PL12 10.80 dB
PL13 13.00 dB
PL1W 23.42892075 W
PL12W 0.56202066 W
PL13W 0.33865094 W
SFO2 400.1316005 MH
SI 32768
SF 100.6128174 MH
WDW EM
SSB 0
LB 1.00 Hz
GB 0
PC 1.40

```

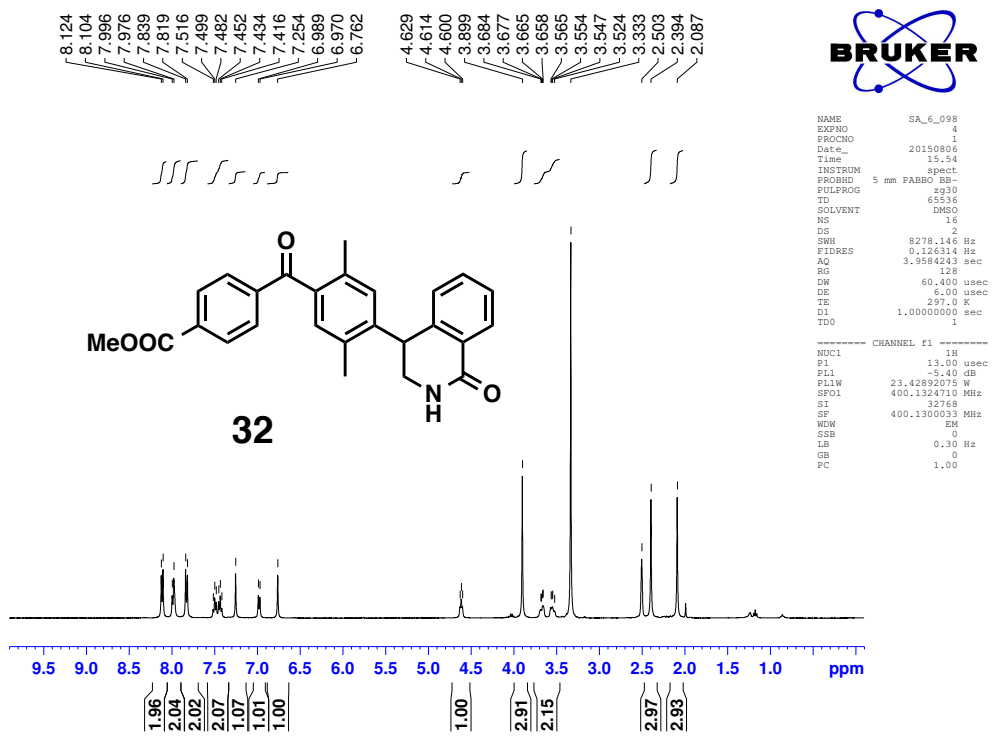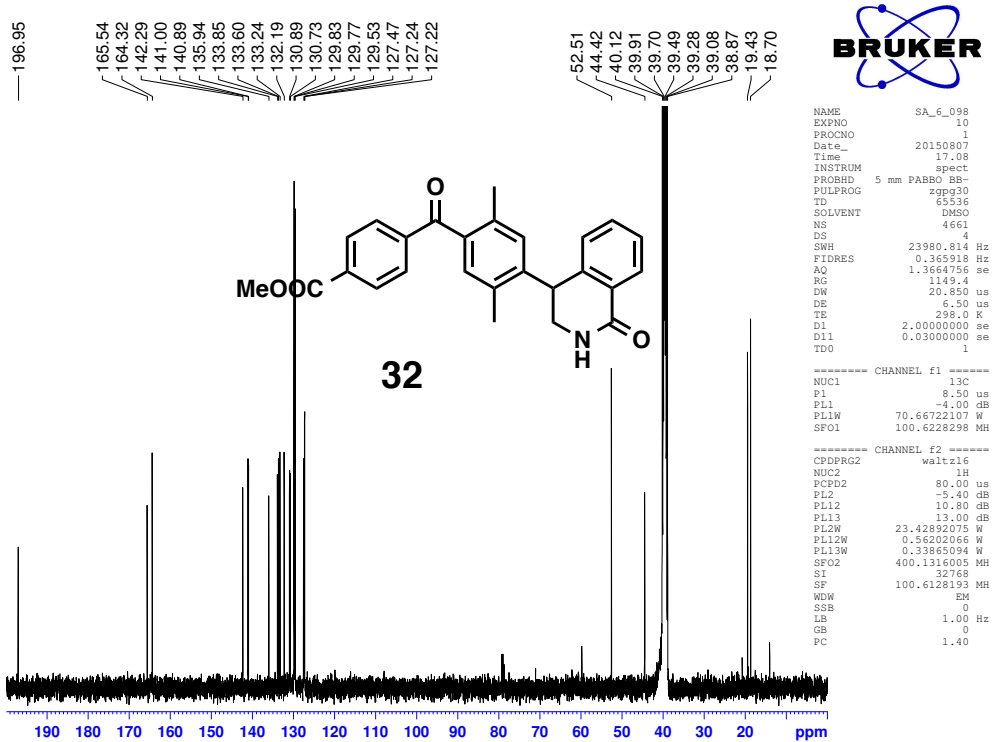

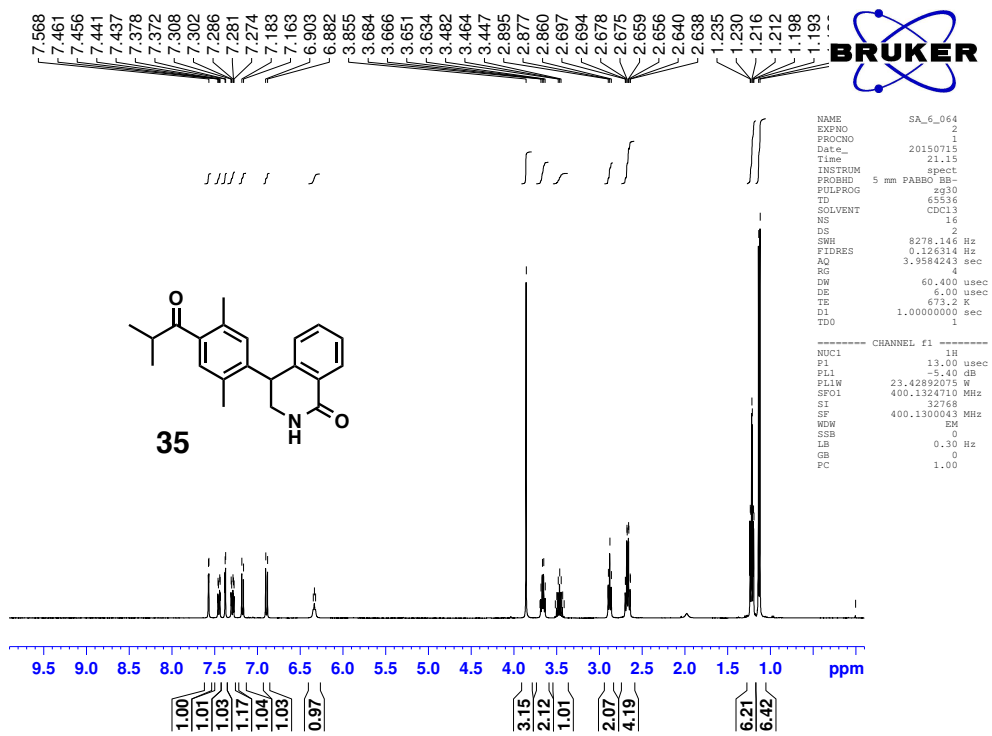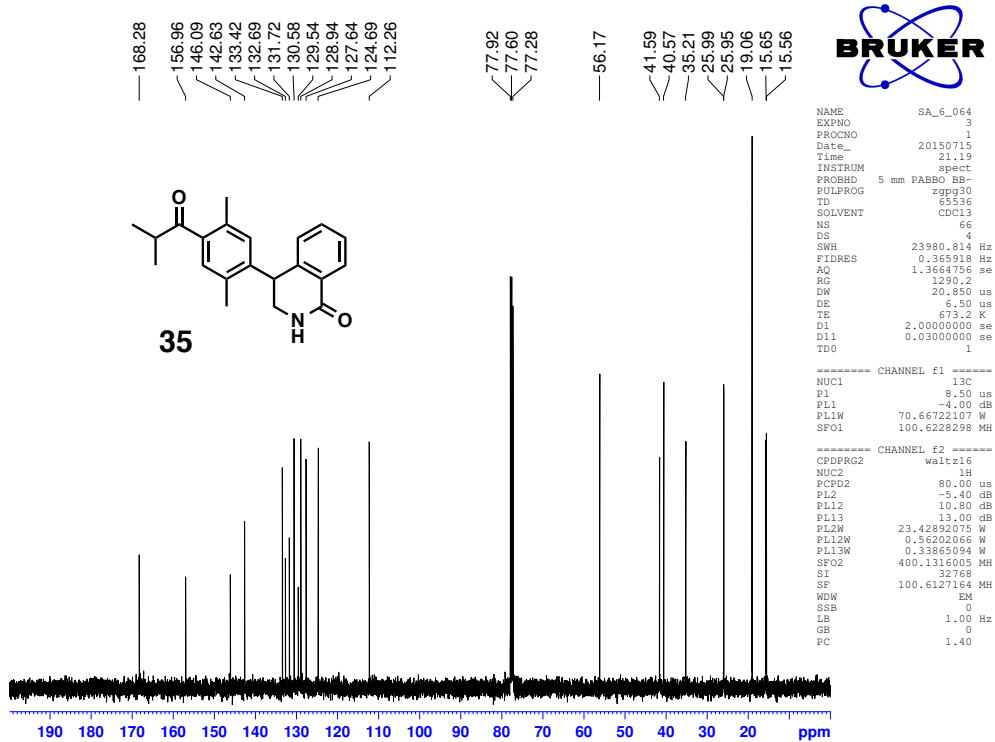

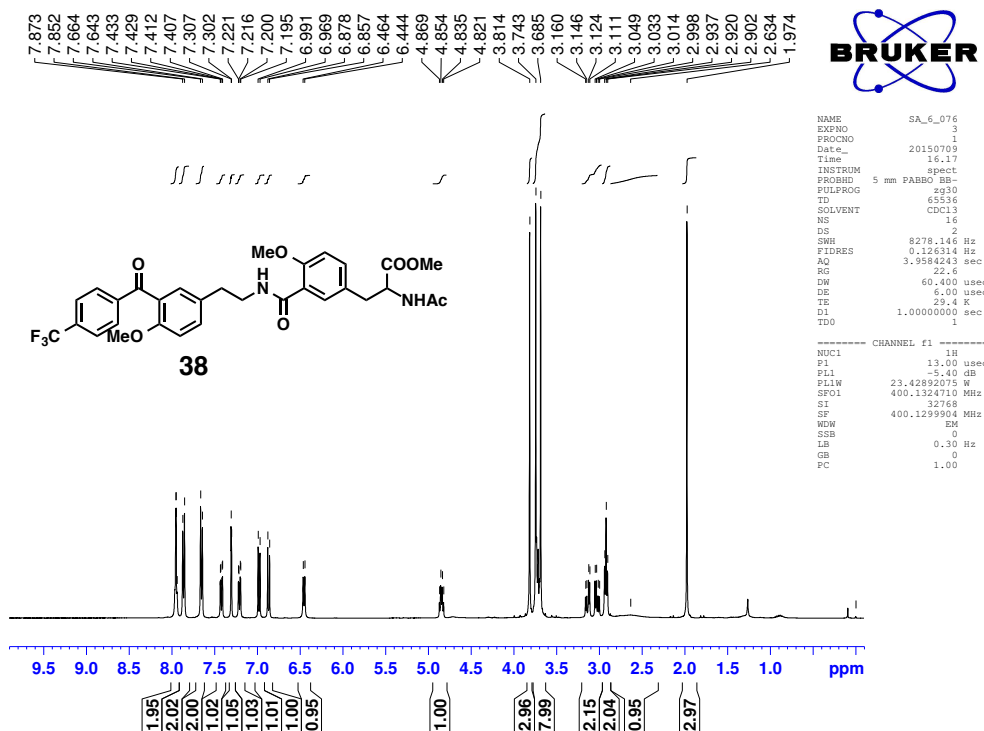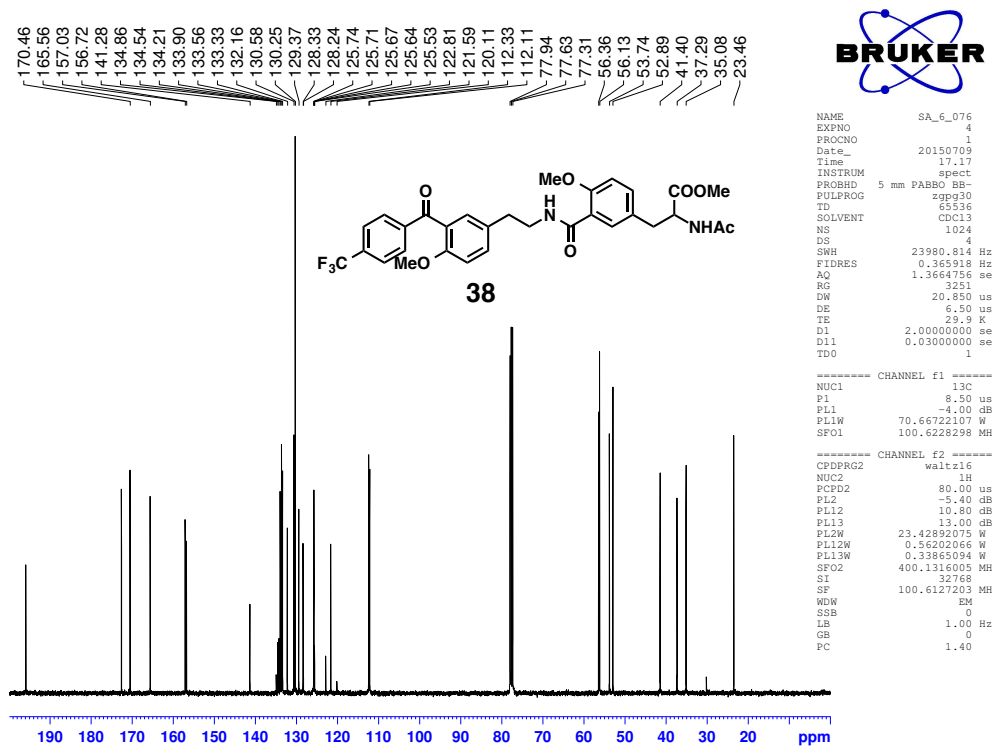



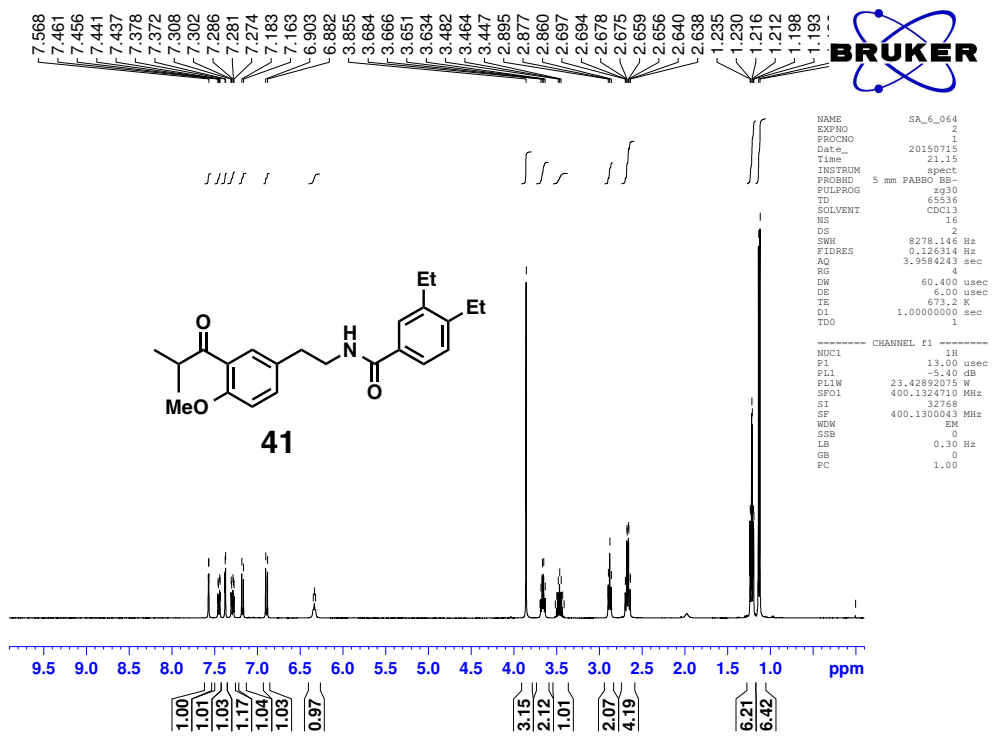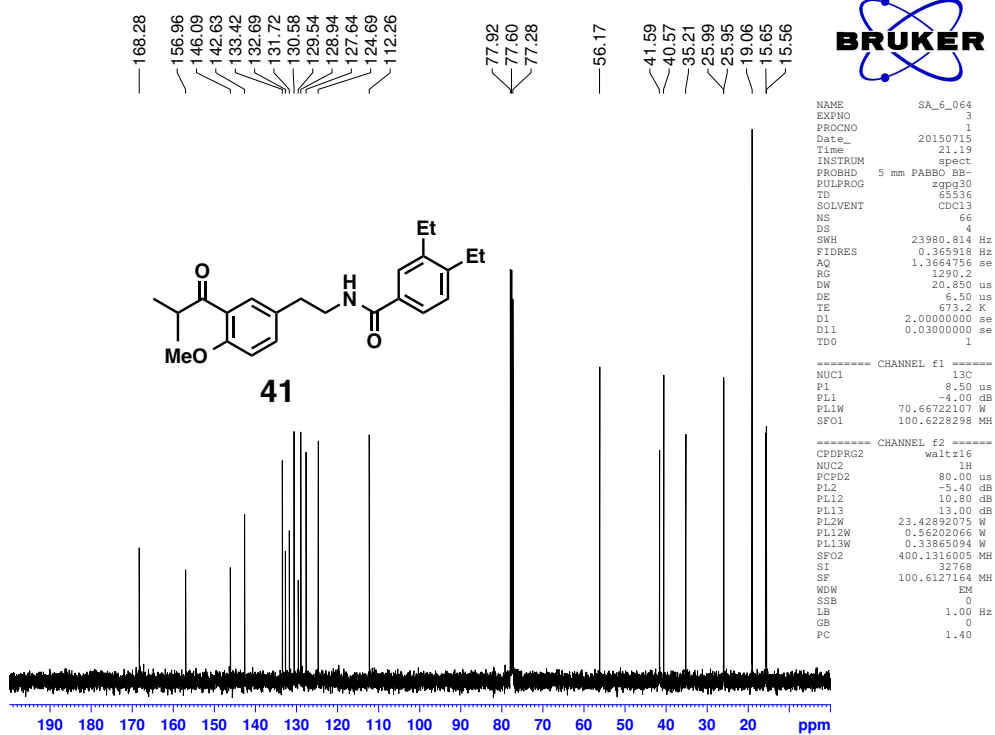

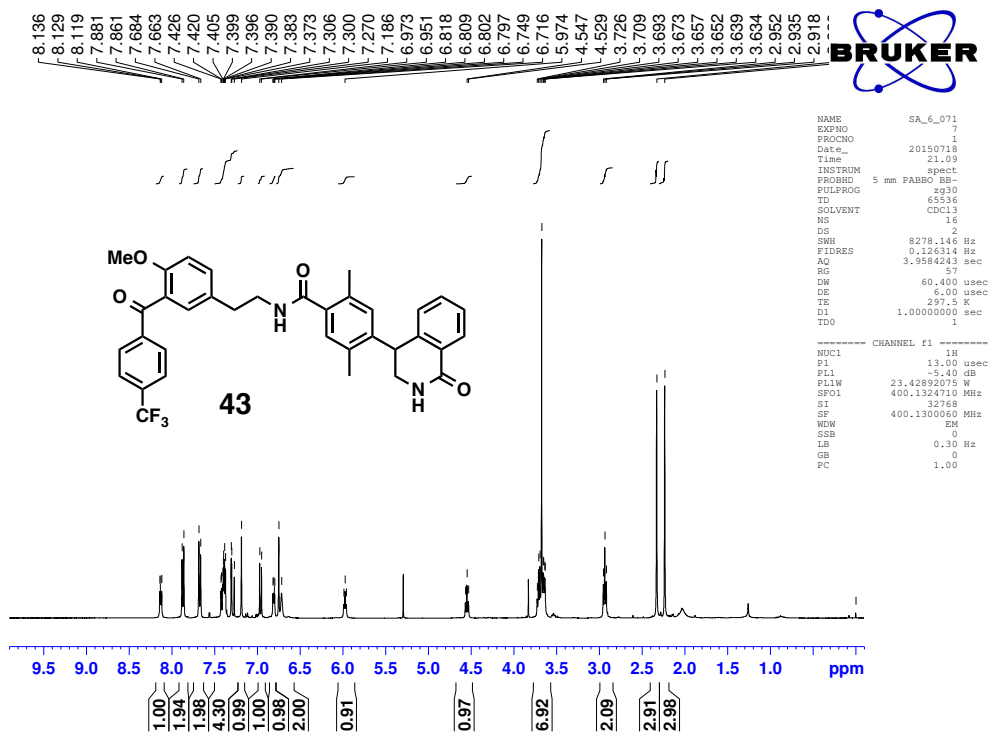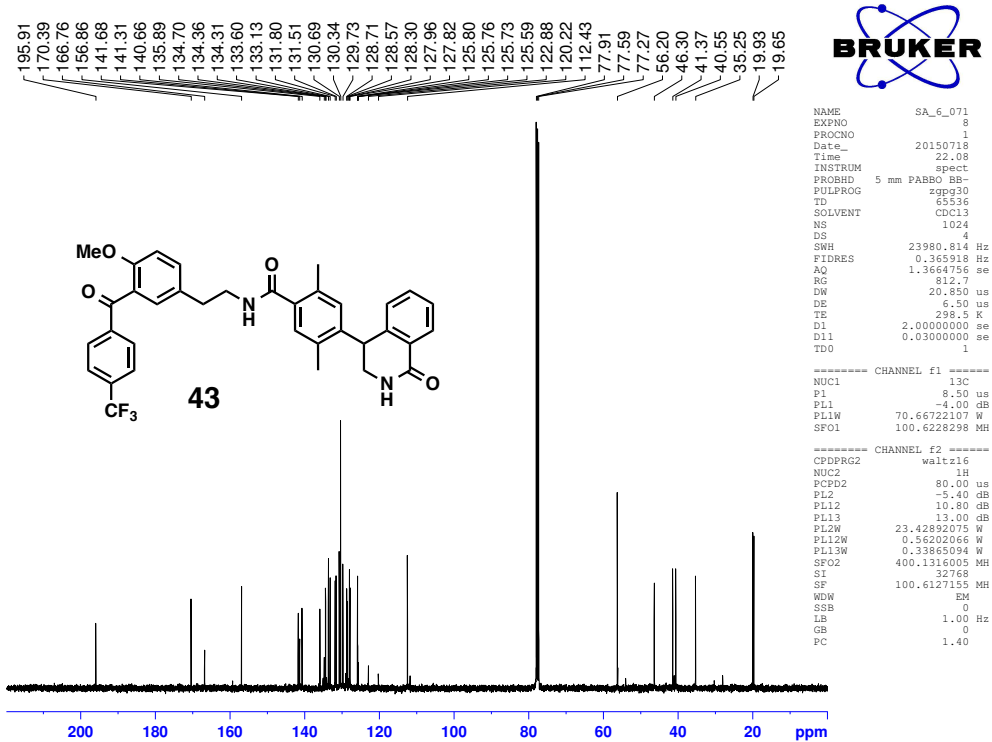

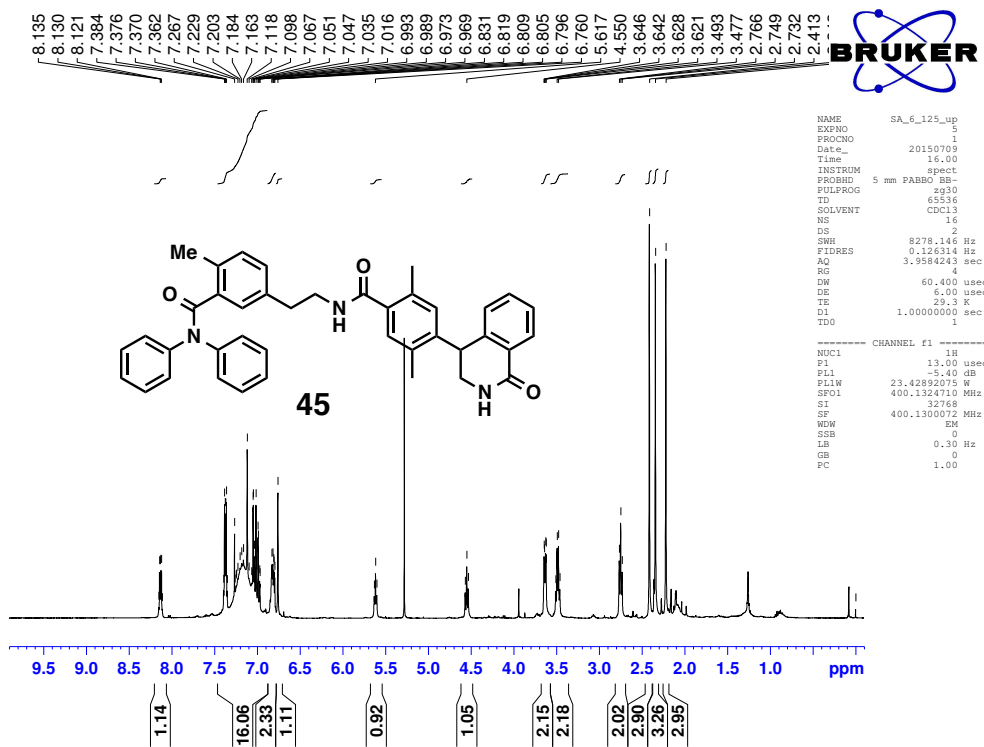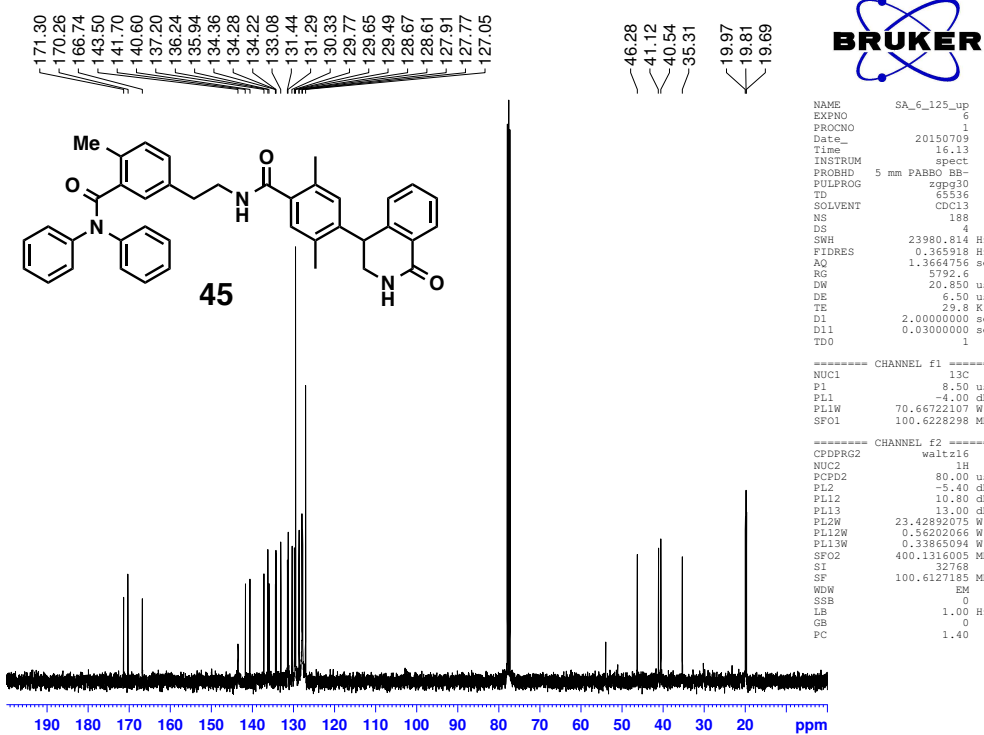

## VI. References in Supporting Information

- [S1] Saito, S.; Saito, S.; Ohwada, T.; Shudo, K. *Chem. Pharm. Bull.* **1991**, *39*(10), 2718 – 2720.
- [S2] Geet ALV (1970) Calibration of methanol nuclear magnetic resonance thermometer at low temperature. *Anal. Chem.* *42* (6): 679 - 680.
- [S3] Frisch, M. J.; Trucks, G. W.; Schlegel, H. B.; Scuseria, G. E.; Robb, M. A.; Cheeseman, J. R.; Scalmani, G.; Barone, V.; Mennucci, B.; Petersson, G. A.; Nakatsuji, H.; Caricato, M.; Li, X.; Hratchian, H. P.; Izmaylov, A. F.; Bloino, J.; Zheng, G.; Sonnenberg, J. L.; Hada, M.; Ehara, M.; Toyota, K.; Fukuda, R.; Hasegawa, J.; Ishida, M.; Nakajima, T.; Honda, Y.; Kitao, O.; Nakai, H.; Vreven, T.; Montgomery, J. A., Jr.; Peralta, J. E.; Ogliaro, F.; Bearpark, M.; Heyd, J. J.; Brothers, E.; Kudin, K. N.; Staroverov, V. N.; Kobayashi, R.; Normand, J.; Raghavachari, K.; Rendell, A.; Burant, J. C.; Iyengar, S. S.; Tomasi, J.; Cossi, M.; Rega, N.; Millam, N. J.; Klene, M.; Knox, J. E.; Cross, J. B.; Bakken, V.; Adamo, C.; Jaramillo, J.; Gomperts, R.; Stratmann, R. E.; Yazyev, O.; Austin, A. J.; Cammi, R.; Pomelli, C.; Ochterski, J. W.; Martin, R. L.; Morokuma, K.; Zakrzewski, V. G.; Voth, G. A.; Salvador, P.; Dannenberg, J. J.; Dapprich, S.; Daniels, A. D.; Farkas, Ö.; Foresman, J. B.; Ortiz, J. V.; Cioslowski, J.; Fox, D. J. (2009) Gaussian 09, Gaussian, Inc., Wallingford CT.
- [S4] Lira AL, Zolotukhin M, Fomina L, Fomine S (2007) Superelectrophilic Activation of 4-Heterocyclohexanones. Implications for polymer synthesis. A theoretical study. *J. Phys. Chem. A* *111* (51): 13606–13610.
- [S5] Corkum R, Milne J (1978) The density, electrical conductivity, freezing point, and viscosity of mixtures of trifluoromethanesulfonic acid and water. *Can. J. Chem.* *56* (13): 1832-1835.
